# Supplementary material for: Socioeconomic position, symptoms of depression and subsequent mental healthcare treatment: a Danish register-based 6-month follow-up study on a population survey
Source: PubMed Central journal article supplement — BMJ Open. 2018 Oct 3;8(10):e020945. doi: 10.1136/bmjopen-2017-020945 (PMC6194401; doi:10.1136/bmjopen-2017-020945), 2018-10-03
Supplement: bmjopen-2017-020945.draft_revisions.pdf [file bmjopen-2017-020945.draft_revisions.pdf]

# BMJ Open

BMJ Open is committed to open peer review. As part of this commitment we make the peer review history of every article we publish publicly available.

When an article is published we post the peer reviewers' comments and the authors' responses online. We also post the versions of the paper that were used during peer review. These are the versions that the peer review comments apply to.

The versions of the paper that follow are the versions that were submitted during the peer review process. They are not the versions of record or the final published versions. They should not be cited or distributed as the published version of this manuscript.

BMJ Open is an open access journal and the full, final, typeset and author-corrected version of record of the manuscript is available on our site with no access controls, subscription charges or pay-per-view fees (<http://bmjopen.bmj.com>).

If you have any questions on BMJ Open's open peer review process please email [info.bmjopen@bmj.com](mailto:info.bmjopen@bmj.com)

# BMJ Open

## Impact of socioeconomic position on symptoms of depression and subsequent mental health care treatment: a Danish six-month register-based follow-up study on a population survey.

|                                 |                                                                                                                                                                                                                                                                                                                                                                                                                                                                                                                                                                                                               |
|---------------------------------|---------------------------------------------------------------------------------------------------------------------------------------------------------------------------------------------------------------------------------------------------------------------------------------------------------------------------------------------------------------------------------------------------------------------------------------------------------------------------------------------------------------------------------------------------------------------------------------------------------------|
| Journal:                        | <i>BMJ Open</i>                                                                                                                                                                                                                                                                                                                                                                                                                                                                                                                                                                                               |
| Manuscript ID                   | bmjopen-2017-020945                                                                                                                                                                                                                                                                                                                                                                                                                                                                                                                                                                                           |
| Article Type:                   | Research                                                                                                                                                                                                                                                                                                                                                                                                                                                                                                                                                                                                      |
| Date Submitted by the Author:   | 02-Dec-2017                                                                                                                                                                                                                                                                                                                                                                                                                                                                                                                                                                                                   |
| Complete List of Authors:       | Packness, Aake; Syddansk Universitet Det Sundhedsvidenskabelige Fakultet, Public Health; Psykiatrien i Region Sjælland, Psychiatric Research Unit<br>Halling, Anders; Lunds Universitet, Department of Clinical Sciences<br>Hastrup, Lene; Psykiatrien i Region Sjælland, Psychiatric Research Unit<br>Simonsen, Erik; Psykiatrien i Region Sjælland, Psychiatric Research Unit<br>Wehberg, Sonja; Syddansk Universitet Institut for Sundhedstjenesteforskning, Department of Public Health<br>Waldorff, Frans; University of Southern Denmark, Research Unit for General Practice, Health Science Department |
| <b>Primary Subject Heading</b>: | Health services research                                                                                                                                                                                                                                                                                                                                                                                                                                                                                                                                                                                      |
| Secondary Subject Heading:      | Mental health, General practice / Family practice, Health policy, Public health, Epidemiology                                                                                                                                                                                                                                                                                                                                                                                                                                                                                                                 |
| Keywords:                       | Depression & mood disorders < PSYCHIATRY, Common Mental Disorders, Access, PUBLIC HEALTH, PRIMARY CARE, Equity                                                                                                                                                                                                                                                                                                                                                                                                                                                                                                |
|                                 |                                                                                                                                                                                                                                                                                                                                                                                                                                                                                                                                                                                                               |

SCHOLARONE™  
Manuscripts

1  
2  
3  
4  
5  
6 **Impact of socioeconomic position on symptoms of depression and subsequent mental health care**  
7 **treatment: a Danish six-month register-based follow-up study on a population survey.**  
8

9 A Packness, A Halling, LH Hastrup, E Simonsen, S Wehberg, FB Waldorff

10  
11 Department of Public Health, University of Southern Denmark, DK-5000 Odense, Denmark. Aake Packness,  
12 MPH, Research Unit for General Practice, University of Southern Denmark. Anders Halling, professor,  
13 Centre for Primary Health Care Research, Family Medicine, Department of Clinical Sciences in Malmö, Lund  
14 University, SE-205 02 Malmö, Sweden. Lene H Hastrup, senior researcher, Psychiatric Research Unit, Region  
15 of Zealand, DK-4200 Slagelse, Denmark. Erik Simonsen, professor, Department of Clinical Medicine,  
16 University of Copenhagen, Psychiatric Research Unit, Region of Zealand, Denmark. Sonja Wehberg,  
17 statistician, Department of Public Health and Research Unit of Clinical Epidemiology, Institute of Clinical  
18 Research, University of Southern Denmark, DK-5000 Odense, Denmark. Frans B Waldorff, professor,  
19 Department of Public Health, University of Southern Denmark, DK-5000 Odense, Denmark.  
20  
21

22 Correspondence to: A Packness [apackness@health.sdu.dk](mailto:apackness@health.sdu.dk)  
23 ORCID-0000-0002-4695-6214  
24

25 Research Unit of General Practice, Institute of Public Health, J.B. Winsløvs Vej 9A, DK-5000 Odense C,  
26 Denmark. Telephone: +45 20537264  
27  
28

29  
30 Word count: 4,343  
31

32 The Corresponding Author has the right to grant on behalf of all authors and does grant on behalf of all  
33 authors, an exclusive licence on a worldwide basis to the BMJ Publishing Group Ltd to permit this article (if  
34 accepted) to be published in BMJ editions and any other BMJ PGL products and sub-licences such use and  
35 exploit all subsidiary rights, as set out in our licence.  
36

37 All authors have completed the Unified Competing Interest form (available on request from the  
38 corresponding author) and declare: no support from any organisation for the submitted, no financial  
39 relationships with any organisations that might have an interest in the submitted work in the previous  
40 three years, and no other relationships or activities that could appear to have influenced the submitted  
41 work.  
42

43  
44 Funding: The study has been supported by an unrestricted grant (No 15-000342) from the Health Research  
45 Foundation of Region Zealand.  
46

47 **Transparency declaration**

48 Aake Packness affirms that this manuscript is an honest, accurate, and transparent account of the study  
49 being reported, that no important aspects of the study have been omitted, and that any discrepancies from  
50 the study as planned have been explained.  
51  
52  
53  
54  
55  
56  
57  
58  
59  
60

## Abstract

**Objective:** The objective was to examine whether the severity of symptoms of depression was determining the type of mental health care treatment received, and if this relationship was influenced by socioeconomic position (SEP).

**Design:** Register-based follow-up study on participants from the Danish General Suburban Population Study (GESUS) 2010 - 2013, who had scored the Major Depression Inventory (MDI).

**Participants:** Of the 21,253 respondents in GESUS, 19,011 were included.

**Interventions:** Mental health care treatment of the participants was tracked in national registers for four months prior and six months after their MDI-score. Health care treatment was graduated in levels. SEP was defined by years of formal education: none; short; medium/long. Data was analysed using logistic and Poisson regression analyses.

**Outcomes:** Mental health treatment included number of contacts to: general practitioner (GP), Mental Health Counselling by GP, prescriptions of antidepressants, psychologist, psychiatrist, emergency contacts and admissions to mental hospital.

**Results:** 988 (5.2%) had symptoms of depression, whereof those in health care contact there was no difference across the educational groups in use of services. However, of the 547 respondents with symptoms of moderate/severe depression, 10% had no treatment contacts at all, and 47% had no treatment beyond GP consultation in the study period. Among respondents with no/few symptoms of depression, longer education was associated with having more contact to specialized services (odds ratio OR 1.92; 95% confidence interval CI 1.18 – 3.13) and fewer prescriptions of antidepressants (OR 0.69; CI 0.50 – 0.95) compared to those without education.

**Conclusion:** We found no indication of inequity in treatment of participants with symptoms of depression, but inequity in treatment of respondents with no/few symptoms of depression: high SEP was referred to specialist services, whereas low SEP more likely was treated with antidepressants. Half the participants with moderate/severe symptoms had no treatment beyond GP consultation.

The study was approved by The Danish Data Protection Agency J. nr. 2015-41-3984.

Accessible at: <https://www.datatilsynet.dk/fortegnelsen/soeg-i-fortegnelsen/>

### Strengths and limitations of this study:

- The design of this study, combining data from a population survey on symptom-score with prospective register data on health care use and medication, is unique in health service research on treatment of people with symptoms of depression.
- The study design made it possible to reduce the inherent problem of recall bias in these types of studies.
- The limited number of health care contacts beyond GP forced us to group symptom-categories and treatment types in order to gain power in the analysis, whereby some accuracy could have been lost.
- The actual reasons for treatment contacts or for prescription of antidepressants were not known and could potentially have been caused by other disorders than depression.

**Title:**

**Impact of socioeconomic position on symptoms of depression and subsequent mental health care treatment: a Danish six-month register-based follow-up study on a population survey.**

**Introduction**

The principles of equal access to health care based on need and reduction of inequalities in health are major policy objectives in most OECD countries<sup>1</sup>. Similarly, the World Health Organization states that addressing social inequalities contributes significantly to health and well-being<sup>2</sup>.

Sustained economic hardship leads to poorer physical, psychological, and cognitive functioning<sup>3</sup>, and social deprivation is associated with more prevalent mental health problems<sup>4</sup>. Specifically, depressive disorders are more prevalent among people in low socioeconomic position (SEP)<sup>5</sup> and enhanced by worsening socioeconomic circumstances<sup>6</sup>. In addition to this, depression is a major health problem, globally ranked as the single largest contributor to non-fatal health loss by 7.5% of all *Years Lived with Disability*<sup>7</sup>. It is estimated that life expectancy is reduced by 14 years for men and 10 years for women treated for severe depression<sup>8</sup>.

Equity in access to health care is commonly defined as equal access for equal need. However, both *access* and *need* are ambiguous concepts<sup>9</sup>. It has been documented that patients in high SEP use more specialized health care services<sup>10;11</sup>, also within mental health care<sup>12</sup>, and far from all in need of mental health care receive it<sup>13-15</sup>. Additionally, not all users of mental health care are in clinical need<sup>16</sup>.

The fact that depressive disorders are widespread and more common among persons in lower SEP makes these disorders well suited for evaluating the capability of health care systems to address the need of deprived citizens. At the same time, being a serious disorder with extensive personal, social and economic consequences makes treatment of depression an important issue.

**Objectives**

We aimed to evaluate whether the Danish health care system delivers equal treatment to patients with symptoms of depression. We defined *mental health care treatment* by specific health care services related to the treatment of depressive disorders as well as treatment with antidepressants.

The objective was to examine if the severity of symptoms of depression (need) was determining the mental health care treatment received, independently of SEP, in both type and frequencies of treatments within six months following a symptom score received in a survey study.

**Method****Setting – Danish health care system**

Health care is tax-funded in Denmark and free at delivery, except dental care and psychologists for adults, which are partly subsidized<sup>17</sup>. The general practitioner (GP) acts as a gatekeeper to more specialized care. Treatment by a psychologist is subsidized for patients with specific conditions, such as reaction to specific traumatic events, moderate depression and, specifically for citizens between 18 and 38 years old, also moderate anxiety disorders. In 2014, the down payment was equivalent to 44€ for each session<sup>18</sup>. The psychologist needs a special authorization by the Danish Supervisory Board of Psychological Practice in order to be subsidized.

### **Study population and data sources**

The study was conducted as a follow-up study on mental health care utilization and use of antidepressants by the participants who scored high on symptoms of depression in the Danish General Suburban Population Study (GESUS)<sup>19</sup> in the municipality of Næstved, Denmark. The municipality is positioned 90 km south of the capital Copenhagen. It has a total population of 81,000 and a socioeconomic index score 4% lower than the national average in 2013<sup>20</sup>. The GESUS data were collected from January 2010 until October 2013. All citizens above the age of 30 were invited, as were a random selection of ¼ of citizens between 20 and 30 years of age. The study consists of 21,253 participants, equivalent to 43% of the invited citizens.

Persons with permanent residence in Denmark are registered in the Danish Civil Registration System (CRS)<sup>21</sup> and are assigned a unique 10 digit identification number, Central Personal Register Number (CPR). The CPR number was registered in the survey data and thus gave information on age and gender and also made it possible to identify the individual in all public registers in Denmark.

Data concerning vital status and migration were gathered from the CRS.

Linking by CPR, the use of healthcare and antidepressants was tracked in registers for four months (120 days) before and six months (180 days) after the respondents entered GESUS, or until their death or migration if that occurred before; thus, the sample consists of respondents entering the GESUS study from May 2010.

### **Independent variables**

Data on all variables came from GESUS, except for outcome data and data on treatment at entry date.

#### *Measure of need*

Depression was chosen as an expression of need, with the Major Depression Inventory (MDI) as measurement tool. The MDI is based on the 12-item Likert scale and found to have an adequate internal and external validity for defining different stages of depression<sup>22</sup>. The MDI is based on the ICD-10 diagnostic criteria for depressive disorder<sup>23</sup>, with scores ranging from 0 to 50. Mild depression is covered by scores from 21 – 25, moderate depression from 26 – 30 and severe depression by scores from 31 – 50<sup>24</sup>. In the study, we reduced the categories to three in order to gain statistical power: no/few symptoms (MDI 0 – 20), mild symptoms (MDI 21-25), and moderate/severe symptoms (MDI 26+). The grouping of symptoms of depression in two groups was supported by the recommended therapeutic approach at the time; patients with mild symptoms were recommended watchful waiting and maybe supportive consultations, whereas the recommended treatment of patients with moderate to severe depression was antidepressants and therapy by a psychologist or a psychiatrist<sup>25</sup>. If more than two items were missing in the MDI, the score was categorized as missing<sup>26</sup>.

#### *Socioeconomic position - Years of education*

SEP is commonly measured by income, occupation, housing tenure, or education, where education is said to gain high response rates in questionnaires<sup>27</sup>. Education was chosen as a measure of SEP in this study, even though older age groups tend to have lower education, they also have lower incomes. Education was determined as: *None*: if the respondent did not study or fulfil any formal education after primary or upper secondary school; *Short*: for *Vocational* 1 – 3 years and *Academy Profession Graduate* 1 – 3 years; *Medium/long*: for *Diploma Graduate* 3 – 4 years; *Academic Graduate* ≥ 5 years. Students were categorized at the same level as the study would end up in, e.g. academic students would be categorized as academics.

**Extrinsic variables:**

Sociodemographic data covered, age, gender, marital status, cohabitation status.

Information on somatic comorbidity included: previous acute myocardial infarction (AMI), arteriosclerosis, angina pectoris, stroke, cancer, diabetes mellitus, hyper- or hypo-thyroidism. The somatic disorders were all grouped into one. Previous depressive episodes were registered separately.

Present medication covered self-reported use of antidepressants. Respondents defined as being *In treatment* included both participants who reported use of antidepressants and participants identified in registers, as described below, who had redeemed a prescription for antidepressants and/or had contact to a psychiatrist and/or a psychologist within four months prior to the date of returning the questionnaire with the depression score; in the following named as the *index date*.

**Dependent variables**

The outcome variables relate to the pathway to treatment of depression as recommended in the national guidelines at the time<sup>25</sup>. They are initiated by counselling and therapy by the GP, followed by a prescription of antidepressants, followed by referral to therapy at a psychologist, then followed by referral to treatment at a psychiatrist and, finally, by referral to outpatient or eventually to inpatient treatment at a psychiatric hospital. (defined by codes in Supplement table 1). Emergency visits to a mental hospital were included in the hospital contacts. The more severe or non-responsive the depression is, the higher the patient is supposed to reach in the recommended treatment hierarchy. Due to few observations in the separate levels, treatments by psychologists or psychiatrists, whether private or public, were pooled into one group for analysis.

Data on the utilization of private psychiatrists, psychologists, and general practitioners (GPs) were drawn from the Danish National Health Service Register for Primary Care<sup>28</sup>. For psychologists only the subsidized services are in the register. Respondents covered by private insurance and treated for depression or anxiety are included in the data as insurance agencies require referral from GPs to compensate for the patients extra expenses. Talk therapy by a GP consists of at least two talks within the first six months and up to seven talks within one year. Talk therapy is registered and paid as additional reimbursement to the GP. In the study, this service was termed as mental health counselling by a GP (MHC by GP). Topics for ordinary consultations by GP are not registered in the national registers.

Data on prescriptions for antidepressants (Anatomical Therapeutic Chemical (ATC) classification system N06A) were extracted from the Danish National Prescription Registry<sup>29;30</sup>. Bupropion (ATC N06AX12) was not included since it is only prescribed for smoking cessation in Denmark.

Information concerning public in- and outpatient psychiatric treatment was drawn from the Danish National Patient Register<sup>31</sup> (ICD-10 coded F00 – F99).

**Statistical analyses**

First, we estimated the association between SEP and the different binary outcome variables (that is, five different types of health care contact: *No health care contact*, *GP consultation*, *Mental health counselling by GP*, *Antidepressants*, and *Specialized mental health services*) in separate logistic regression models, both uni- and multivariable. Each model was stratified into three MDI categories: no/few symptoms (MDI < 21), symptoms of mild depression (MDI 21 – 25), and symptoms of moderate to severe depression (MDI > 26)).

1  
2  
3  
4 The SEP category *No education* was used as reference category. To examine a possible interaction between  
5 SEP and MDI category, we employed logistic regression models for each outcome with patients having *No*  
6 *education* and *no/few depression symptoms* as key reference.  
7

8  
9 Second, in order to evaluate differences in visit and prescription rates, we estimated incidence rate ratios  
10 (IRR) by Poisson regression models for each type of contact (*GP consultation, Mental health counselling by*  
11 *GP, Antidepressants, and Specialized mental health services*). For each type of contact, analyses were  
12 restricted to those patients who had at least one contact. For exposure, death and emigration within 180  
13 days after index date were taken into consideration. As above, analyses were stratified into MDI category,  
14 and the SEP category *No education* was used as reference category.  
15

16  
17 Finally, we performed a linear regression analysis for the effect of combined SEP and MDI category on the  
18 highest reached treatment level (see Table 1 above). The treatment level was categorized as shown in table  
19 1, (0: no treatment/contact; 1: GP consultation; 2: MHC by GP; 3: antidepressants; 4: psychologist; 5:  
20 private psychiatrist; 6: public psychiatrist; 7: psychiatric hospital). Patients having *No education* and *no/few*  
21 *depression symptoms* were the key reference groups.  
22

23  
24 All multivariable regression models included age (*20-59* versus *60+*), gender and present treatment with  
25 antidepressants, psychologist or psychiatrist (*yes/no*) in addition to the variable studied in the univariate  
26 (crude) analysis.  
27

28  
29 The significance level was 5% throughout, and all reported confidence intervals were 95% confidence  
30 intervals. All statistical analyses were performed using Stata 14<sup>32</sup>.  
31

### 32 33 **Ethics**

34 Access to data from the GESUS was approved by the board of the GESUS in December 2015. The data were  
35 stored at a server at Statistics Denmark. The collection and handling of the data has been approved by the  
36 Danish Data Protection Agency, Journal number: 2015-41-3984. Approval by an ethics committee is not  
37 required for register studies in Denmark.  
38  
39  
40  
41  
42  
43  
44  
45  
46  
47  
48  
49  
50  
51  
52  
53  
54  
55  
56  
57  
58  
59  
60



## Results

The study included 19,011 respondents from the GESUS study, after being reduced by 1,627 respondents to fit the register timeframe for the present treatment and by 615 respondents who did not have a valid MDI score. In all, 988 (5.2%) had symptoms of depression. Of these, 441 had symptoms of mild depression and 547 symptoms of moderate and severe depression, whereof 271 were grouped severe. 29 deaths and four persons emigrating were included in the analysis until death or migration (flowchart in Supplement).

In the GESUS sample, respondents with no education were underrepresented by one third when compared to the population they were sampled from; those with a short education had a little higher representation and the proportion with longer education had an almost 30 percent higher representation, compared to the population in Næstved<sup>33</sup>. The educational status of respondents aged 70+ was almost similar to the status of the study population under 70 years.

The baseline characteristics show respondents with symptoms from mild to severe depression to be: younger, more singles, living without a partner, and without formal education (Table 1). More respondents had a prior history of depression and more had a comorbid somatic disorder.

**Table 1. Baseline characteristics of the study population by MDI grade**

| MDI score                                                                                                                                 | All          | MDI < 21     | MDI 21 - 25 | MDI 26+        | MDI missing |
|-------------------------------------------------------------------------------------------------------------------------------------------|--------------|--------------|-------------|----------------|-------------|
| <b>Symptoms of depression</b>                                                                                                             | n (pct.)     | None/few     | Mild        | Moder./severe§ | NA          |
| All                                                                                                                                       | 19626 (100)  | 18023 (100)  | 441 (100)   | 547 (100)      | 615 (100)   |
| <b>In treatment*</b>                                                                                                                      |              |              |             |                |             |
| No                                                                                                                                        | 18076 (92.1) | 16860 (93.5) | 334 (75.7)  | 335 (61.2)     | 547 (88.9)  |
| Yes                                                                                                                                       | 1550 (7.9)   | 1163 (6.5)   | 107 (24.3)  | 212 (38.8)     | 68 (11.1)   |
| <b>Gender</b>                                                                                                                             |              |              |             |                |             |
| Male                                                                                                                                      | 8927 (45.5)  | 8349 (46.3)  | 162 (36.7)  | 168 (30.7)     |             |
| Female                                                                                                                                    | 10699 (54.5) | 9674 (53.7)  | 279 (63.3)  | 379 (69.3)     |             |
| <b>age group</b>                                                                                                                          |              |              |             |                |             |
| 20-29                                                                                                                                     | 294 (1.5)    | 266 (1.5)    | 10 (2.3)    | 17 (3.1)       |             |
| 30-39                                                                                                                                     | 2382 (12.1)  | 2206 (12.2)  | 79 (17.9)   | 86 (15.7)      |             |
| 40-49                                                                                                                                     | 4186 (21.3)  | 3891 (21.6)  | 106 (24)    | 146 (26.7)     |             |
| 50-59                                                                                                                                     | 4417 (22.5)  | 4100 (22.7)  | 115 (26.1)  | 144 (26.3)     |             |
| 60-69                                                                                                                                     | 5123 (26.1)  | 4771 (26.5)  | 74 (16.8)   | 93 (17)        |             |
| 70+                                                                                                                                       | 3224 (16.4)  | 2789 (15.5)  | 57 (12.9)   | 61 (11.2)      |             |
| <b>Marital status</b>                                                                                                                     |              |              |             |                |             |
| Married                                                                                                                                   | 13398 (68.3) | 12519 (69.5) | 234 (53.1)  | 259 (47.3)     |             |
| Separated/divorced                                                                                                                        | 2174 (11.1)  | 1936 (10.7)  | 71 (16.1)   | 117 (21.4)     |             |
| Widow/er                                                                                                                                  | 1385 (7.1)   | 1172 (6.5)   | 37 (8.4)    | 45 (8.2)       |             |
| Nothing of above                                                                                                                          | 2669 (13.6)  | 2396 (13.3)  | 99 (22.4)   | 126 (23)       |             |
| <b>Cohabiting</b>                                                                                                                         |              |              |             |                |             |
| No                                                                                                                                        | 4342 (22.1)  | 3745 (20.8)  | 147 (33.3)  | 217 (39.7)     |             |
| Yes (incl missing)                                                                                                                        | 15284 (77.9) | 14278 (79.2) | 294 (66.7)  | 330 (60.3)     |             |
| <b>Education</b>                                                                                                                          |              |              |             |                |             |
| None                                                                                                                                      | 2988 (15.2)  | 2502 (13.9)  | 93 (21.1)   | 136 (24.9)     |             |
| Vocational/1-3yrs (Short)                                                                                                                 | 8227 (41.9)  | 7645 (42.4)  | 169 (38.3)  | 199 (36.4)     |             |
| Short/<3yrs (Short)                                                                                                                       | 2156 (11)    | 2005 (11.1)  | 56 (12.7)   | 58 (10.6)      |             |
| Medium/3-4yrs (Medium-long)                                                                                                               | 5024 (25.6)  | 4706 (26.1)  | 104 (23.6)  | 137 (25)       |             |
| Academic/5+yrs (Medium-long)                                                                                                              | 1231 (6.3)   | 1165 (6.5)   | 19 (4.3)    | 17 (3.1)       |             |
| <b>Comorb. former depression</b>                                                                                                          |              |              |             |                |             |
| No                                                                                                                                        | 16755 (85.4) | 15826 (87.8) | 255 (57.8)  | 210 (38.4)     |             |
| Yes                                                                                                                                       | 2484 (12.7)  | 1917 (10.6)  | 173 (39.2)  | 319 (58.3)     |             |
| Missing                                                                                                                                   | 387 (2)      | 280 (1.6)    | 13 (2.9)    | 18 (3.3)       |             |
| <b>Comorbidity somatic, all #</b>                                                                                                         |              |              |             |                |             |
| No                                                                                                                                        | 13791 (70.3) | 13109 (72.7) | 195 (44.2)  | 168 (30.7)     |             |
| Yes                                                                                                                                       | 5835 (29.7)  | 4914 (27.3)  | 246 (55.8)  | 379 (69.3)     |             |
| <b>Medication antidepressants #</b>                                                                                                       |              |              |             |                |             |
| No                                                                                                                                        | 18537 (94.5) | 17213 (95.5) | 363 (82.3)  | 385 (70.4)     | 576 (93.7)  |
| Yes                                                                                                                                       | 1089 (5.5)   | 810 (4.5)    | 78 (17.7)   | 162 (29.6)     | 39 (6.3)    |
| § Moderate or severe                                                                                                                      |              |              |             |                |             |
| * In treatment at index date or 120 days before by psychologist, psychiatrist, or with antidepressiva according to GESUS or register data |              |              |             |                |             |
| # Somatic comorbidities: Ischemic heart disease, diabetes, cancer, metabolic diseases                                                     |              |              |             |                |             |
| # replied in questionnaire                                                                                                                |              |              |             |                |             |

1  
2  
3  
4 The crude number of contacts and mean number of visits shows overall more frequent visits by the group  
5 with symptoms of depression; though, of all 1,677 visits to specialized services, two thirds (65%) of the  
6 visits were by respondents with no/few symptoms of depression. (Supplement table 2)  
7

8 Table 2 shows odds ratios for mental health care treatment contacts. Among respondents with symptoms  
9 of depression, there was no statistically significant difference across educational groups in odds for  
10 contacts and prescriptions in the adjusted analyses, except that those with short education and mild  
11 symptoms had a lower use of mental health counselling by GP (adjusted odds ratio (aOR) 0.30, confidence  
12 interval (CI) 0.10 – 0.91), compared to respondents without education. Among respondents with no/few  
13 symptoms, the group with longer education were 30% more likely to have no contact at all compared to  
14 the group without education (aOR 1.32, CI 1.18 – 1.49). They also had fewer consultations by GP (aOR 0.77,  
15 CI 0.68 – 0.86) and fewer prescriptions of antidepressants (aOR 0.69, CI 0.50 – 0.95), compared to those  
16 without education. However, they more often had contact to specialized services (aOR 1.92, CI 1.18 – 3.13),  
17 alongside those with short education (aOR 1.81, CI 1.13 – 2.88).  
18  
19  
20  
21  
22  
23  
24  
25  
26  
27  
28  
29  
30  
31  
32  
33  
34  
35  
36  
37  
38  
39  
40  
41  
42  
43  
44  
45  
46  
47  
48  
49  
50  
51  
52  
53  
54  
55  
56  
57  
58  
59  
60

**Table 2: Odds ratios for type of *Mental health care treatment* by educational level stratified by MDI grade**

| Symptoms of depression             | No/Few<br>(N=18023 pts.) |                         | Mild<br>(N = 441 pts.)  |                         | Moderate/severe<br>(N = 547 pts.) |                  |
|------------------------------------|--------------------------|-------------------------|-------------------------|-------------------------|-----------------------------------|------------------|
|                                    | Crude OR                 | OR (adjusted)*          | Crude OR                | OR (adjusted)*          | Crude OR                          | OR (adjusted)*   |
| <b>No health care contact</b>      | Ref                      | Ref                     | Ref                     | Ref                     | Ref                               | Ref              |
| No education                       | Ref                      | Ref                     | Ref                     | Ref                     | Ref                               | Ref              |
| Short education                    | <b>1.26 (1.13–1.40)</b>  | 1.10 (0.98–1.23)        | 1.96 (0.91–4.22)        | 1.62 (0.71–3.67)        | 1.73 (0.79–3.77)                  | 1.62 (0.72–3.65) |
| Medium/Long education              | <b>1.54 (1.38–1.72)</b>  | <b>1.32 (1.18–1.49)</b> | <b>2.38 (1.05–5.38)</b> | 2.01 (0.84–4.83)        | 1.99 (0.87–4.55)                  | 1.79 (0.76–4.23) |
| <b>GP consultation</b>             |                          |                         |                         |                         |                                   |                  |
| No education                       | Ref                      | Ref                     | Ref                     | Ref                     | Ref                               | Ref              |
| Short education                    | <b>0.80 (0.72–0.89)</b>  | 0.92 (0.82–1.02)        | 0.52 (0.26–1.06)        | 0.64 (0.31–1.35)        | 0.68 (0.35–1.31)                  | 0.70 (0.36–1.37) |
| Medium/Long education              | <b>0.66 (0.59–0.74)</b>  | <b>0.77 (0.68–0.86)</b> | <b>0.46 (0.21–0.97)</b> | 0.54 (0.24–1.19)        | 0.69 (0.34–1.41)                  | 0.74 (0.36–1.53) |
| <b>GP Mental health counseling</b> |                          |                         |                         |                         |                                   |                  |
| No education                       | Ref                      | Ref                     | Ref                     | Ref                     | Ref                               | Ref              |
| Short education                    | 1.20 (0.84–1.71)         | 1.09 (0.76–1.57)        | <b>0.34 (0.12–0.97)</b> | <b>0.30 (0.10–0.91)</b> | 1.20 (0.61–2.33)                  | 1.27 (0.65–2.50) |
| Medium/Long education              | 1.31 (0.90–1.89)         | 1.21 (0.83–1.76)        | 1.26 (0.50–3.17)        | 1.03 (0.38–2.81)        | 1.23 (0.59–2.55)                  | 1.30 (0.62–2.73) |
| <b>Antidepressants</b>             |                          |                         |                         |                         |                                   |                  |
| No education                       | Ref                      | Ref                     | Ref                     | Ref                     | Ref                               | Ref              |
| Short education                    | 0.85 (0.71–1.01)         | 0.75 (0.55–1.01)        | 0.96 (0.52–1.77)        | 1.11 (0.47–2.65)        | 0.72 (0.47–1.10)                  | 0.82 (0.43–1.56) |
| Medium/Long education              | <b>0.69 (0.57–0.83)</b>  | <b>0.69 (0.50–0.95)</b> | 1.17 (0.60–2.29)        | 1.40 (0.54–3.63)        | 0.65 (0.40–1.05)                  | 0.86 (0.42–1.77) |
| <b>Specialized services</b> ⊠      |                          |                         |                         |                         |                                   |                  |
| No education                       | Ref                      | Ref                     | Ref                     | Ref                     | Ref                               | Ref              |
| Short education                    | <b>1.94 (1.24–3.03)</b>  | <b>1.81 (1.13–2.88)</b> | 1.34 (0.52–3.46)        | 0.79 (0.27–2.36)        | 1.30 (0.70–2.43)                  | 1.73 (0.87–3.41) |
| Medium/Long education              | <b>1.91 (1.20–3.05)</b>  | <b>1.92 (1.18–3.13)</b> | 2.01 (0.75–5.41)        | 1.41 (0.45–4.36)        | 1.25 (0.63–2.49)                  | 1.67 (0.78–3.57) |

\* Adjusted for age-group 60 +/-, gender, present treatment of antidepressiva, psychologist or psychiatrist

⊠ Psychologist or psychiatrist public or private

Results significant within a 95% confidence interval are marked in bold

**Table 3: Incidence rate ratios for *Mental health care treatments* by educational level stratified by MDI grade**

| Symptoms of depression                          | No/few                  |                         | Mild                    |                         | Moderate/severe         |                         |
|-------------------------------------------------|-------------------------|-------------------------|-------------------------|-------------------------|-------------------------|-------------------------|
|                                                 | IRR (crude)             | IRR (Adjusted)*         | IRR (crude)             | IRR (Adjusted)*         | IRR (crude)             | IRR (Adjusted)*         |
| <b>GP consultation</b>                          |                         |                         |                         |                         |                         |                         |
| No education                                    | Ref                     | Ref                     | Ref                     | Ref                     | Ref                     | Ref                     |
| Short education                                 | <b>0.82</b> (0.80–0.84) | <b>0.87</b> (0.85–0.89) | <b>0.79</b> (0.69–0.89) | <b>0.88</b> (0.77–0.99) | <b>0.81</b> (0.73–0.89) | <b>0.81</b> (0.74–0.89) |
| Medium/Long education                           | <b>0.77</b> (0.75–0.80) | <b>0.84</b> (0.81–0.86) | <b>0.74</b> (0.64–0.86) | <b>0.83</b> (0.72–0.97) | <b>0.76</b> (0.68–0.85) | <b>0.77</b> (0.69–0.86) |
| <b>GP Mental health counseling</b>              |                         |                         |                         |                         |                         |                         |
| No education                                    | Ref                     | Ref                     | Ref                     | Ref                     | Ref                     | Ref                     |
| Short education                                 | 0.93 (0.73–1.20)        | 0.93 (0.72–1.20)        | 1.36 (0.70–2.64)        | 1.22 (0.58–2.56)        | 1.08 (0.74–1.58)        | 1.13 (0.77–1.65)        |
| Medium/Long education                           | 0.93 (0.72–1.22)        | 0.93 (0.71–1.21)        | 0.85 (0.44–1.61)        | 0.82 (0.40–1.69)        | 0.76 (0.48–1.18)        | 0.79 (0.50–1.24)        |
| <b>Antidepressants#</b>                         |                         |                         |                         |                         |                         |                         |
| No education                                    | Ref                     | Ref                     | Ref                     | Ref                     | Ref                     | Ref                     |
| Short education                                 | 0.95 (0.85–1.05)        | 0.93 (0.84–1.03)        | 1.03 (0.73–1.46)        | 1.05 (0.73–1.50)        | 1.07 (0.89–1.28)        | 1.06 (0.88–1.27)        |
| Medium/Long education                           | 1.00 (0.89–1.12)        | 1.01 (0.90–1.13)        | 1.10 (0.76–1.59)        | 1.11 (0.77–1.62)        | 1.12 (0.91–1.37)        | 1.08 (0.88–1.33)        |
| <b>Specialized services<math>\square</math></b> |                         |                         |                         |                         |                         |                         |
| No education                                    | Ref                     | Ref                     | Ref                     | Ref                     | Ref                     | Ref                     |
| Short education                                 | 0.97 (0.77–1.22)        | 0.94 (0.75–1.19)        | 1.11 (0.71–1.71)        | 0.93 (0.58–1.48)        | 0.93 (0.72–1.21)        | 0.94 (0.72–1.22)        |
| Medium/Long education                           | 1.06 (0.84–1.34)        | 1.02 (0.80–1.29)        | 1.32 (0.85–2.05)        | 1.02 (0.63–1.66)        | 1.09 (0.82–1.43)        | 1.10 (0.83–1.46)        |

\*adjusted for age-group 60 +/-, gender, present treatment of antidepressiva, psychologist or psychiatrist

$\square$  Psychologist or psychiatrist, public or private

# Number reimbursed prescriptions

Results significant within a 95% confidence interval are marked in bold

Table 3 shows that the incidence rate ratios of visits to a GP were higher for the group with no education compared to the others independent of depression score. For all other outcomes, there were no significant differences between educational groups in visit rates, when adjusted for age, gender, and present treatment among those using the services.

Table 4 shows the highest gained treatment level within the 180 days in crude numbers. More severe symptoms were more often met with a higher level of treatment, though 10% of the respondents with symptoms of moderate to severe depression had no contact at all. 47% of the 547 with symptoms of moderate to severe depression had no treatment or contacts beyond a GP consultation. This proportion was the same in all educational groups (not shown).

**Table 4. Highest gained treatment level by MDI grade**

| Final treatment level\MDI grade | No/few       | Mild       | Mod./severe |
|---------------------------------|--------------|------------|-------------|
| <b>No contacts</b>              | 4540 (25.2)  | 73 (16.6)  | 56 (10.2)   |
| <b>GP consultation</b>          | 12084 (67)   | 257 (58.3) | 259 (47.3)  |
| <b>GP MHC</b>                   | 160 (.9)     | 5 (1.1)    | 20 (3.7)    |
| <b>Antidepressants#</b>         | 931 (5.2)    | 64 (14.5)  | 125 (22.9)  |
| <b>Psychologists</b>            | 162 (.9)     | 17 (3.9)   | 27 (4.9)    |
| <b>Priv psychiatrist</b>        | 96 (.5)      | 18 (4.1)   | 39 (7.1)    |
| <b>Out-pat. Psychiatry</b>      | 17 (.1)      | 3 (.7)     | 7 (1.3)     |
| <b>Admission MH &amp; EA **</b> | 33 (.2)      | 4 (.9)     | 14 (2.6)    |
| <b>Sum</b>                      | 18.023 (100) | 441 (100)  | 547 (100)   |

Percent's in brackets

# Reimbursed prescriptions

\* Contact to either psychologist or psychiatrist, public or private

\*\* MH: Mental hospital; EA: Emergency access psychiatric ward

Table 5 shows that respondents with symptoms of depression gained a significantly higher treatment level, increasing with higher symptom score, compared to those with no/few symptoms and no education. For the group with no/few symptoms, respondents with longer education reached all in all a lower level. We found no statistically significant differences between educational groups stratified by grade of symptoms, but a significant increase in treatment level within each educational group, when depression score increased from no/few symptoms to symptoms of mild depression, and again when it changed to symptoms of moderate/severe depression (results not shown).

**Table 5. Mean level of *Mental health care treatment* by educational level and MDI grade**

|                                               | .97 (N=19011) | $\beta^*$                   |
|-----------------------------------------------|---------------|-----------------------------|
| <b>No/few symptoms of depression</b>          |               |                             |
| No education                                  | 0.98 (N=2502) | (Ref)                       |
| Short education                               | 0.94 (N=9650) | -0.01 (-0.04; 0.02)         |
| Medium/Long education                         | 0.87 (N=5871) | <b>-0.05 (-0.08; -0.02)</b> |
| <b>Mild symptoms of depression</b>            |               |                             |
| No education                                  | 1.49 (N=93)   | <b>0.15 (0.01; 0.29)</b>    |
| Short education                               | 1.47 (N=225)  | <b>0.14 (0.05; 0.24)</b>    |
| Medium/Long education                         | 1.58 (N=123)  | <b>0.22 (0.10; 0.35)</b>    |
| <b>Moderate/severe symptoms of depression</b> |               |                             |
| No education                                  | 2.18 (N=136)  | <b>0.37 (0.26; 0.49)</b>    |
| Short education                               | 1.99 (N=257)  | <b>0.35 (0.26; 0.44)</b>    |
| Medium/Long education                         | 2.01 (N=154)  | <b>0.45 (0.33; 0.56)</b>    |

\* adjusted for age 60 +/-, gender, present treatment of antidepressants, psychologist or psychiatrist

Treatment levels: 0: no contact; 1: GP consultation; 2: GP MHC; 3: Antidepressants; 4: psychologist;

5: priv. psychiatrist; 6: publ. psychiatrist; 7: psychiatric hospital & emergency visits

## Discussion

We combined results from a symptom score of depression (MDI) at baseline from GESUS with subsequent mental health care treatment within the following six months. Symptoms of depression were associated with higher treatment level, increasing with severity of symptoms independently of educational level as a measure of SEP.

However, not all in need received treatment for depression. Ten percent of the respondents with symptoms of moderate to severe depression had no contact at all during the six months following the index date. Another 47% of this group, independent of SEP, settled for a consultation by a GP only.

Additionally, not all of the respondents treated were in need. Two thirds of the visits to specialized services, mostly psychologists, were made by respondents with no/few symptoms of depression, and those with short and longer education used specialized mental health services almost twice as often compared to respondents with no education.

A strength of this study was that we were able to obtain reliable data on need from a large sample of people in the GESUS as well as high quality data on healthcare contacts and prescriptions of antidepressants from Danish registers, challenges common in studies of equality in health care<sup>9</sup>. To our knowledge, this is the first study combining survey data reporting depression score with register data on mental health care treatment. Thus we managed to avoid the inherent problem of recall bias, which is a common problem in these types of studies<sup>34</sup>.

The sample size forced us to group depression into two instead of three categories and the specialized services into one, whereby some accuracy could be lost.

1  
2  
3 We used education as indicator of SEP. The span of respondents: from a few students to a high proportion of  
4 older and retired persons, as seen in the sample, makes income and employment status less potent to  
5 differentiate the resources that the respondents could be expected to have. For that reason, education was  
6 chosen, even though older age is associated with lower educational attainment<sup>27</sup>. Additionally, education  
7 comes out as a particularly important factor when evaluating the use of health care specialists<sup>10</sup>. The sample  
8 had a lower proportion without education compared to the population of Næstved in the age group less than  
9 70, but we did not consider this to be relevant in the inter-educational comparisons where we adjusted for age  
10 over 60.  
11  
12

13  
14 The study related to use of services based on an indication of need stretching up to six prior months. Need will  
15 change over time, but such change would not be expected to differ within the educational groups and, if so,  
16 would be expected to change towards higher need for those with no education.  
17

18  
19 The actual reasons for treatment contacts were not known, nor were the reasons for prescriptions of  
20 antidepressants. Both could have been for other disorders than depression. The variety of possible reasons is  
21 not expected to differ between the socioeconomic groups, which is why it should not have an impact on our  
22 conclusions.  
23

24  
25 Not all services used are included in the registers. If the patient is not referred from a GP and pays the full  
26 expense out of own pocket, there will be no reimbursement and subsequently no registration of the service in  
27 the registers. This would usually require a high income, which is often associated with a longer education. We  
28 have no information for this study, but we do not expect it to be common.  
29

### 30 *Need & use*

31  
32 Respondents in need and in contact with health care providers were treated according to their needs. No  
33 association between education, type of treatment, or rates of contacts to GP-MHC and specialized services was  
34 found for the group with symptoms of depression, and treatment levels were associated with severity of  
35 symptoms. Such a finding might be due to lack of statistical power to detect existing differences, however, the  
36 finding is in accordance with other studies on the treatment of respondents with symptoms of depression<sup>35</sup>  
37 that likewise, found no independent impact of SEP on type of treatment<sup>36-38</sup> or intensity of treatment<sup>37;39</sup>. Yet,  
38 some studies have found that higher education was associated with more use of specialized mental health  
39 care, even when adjusted for needs<sup>40-42</sup>. All prior studies rely on recalled service use. It is a strength of the  
40 present study that it relies on register data, which minimizes the risk of recall bias.  
41  
42  
43

### 44 *Need & no use*

45  
46 Firstly, we found that 10 percent of 547 respondents with moderate to severe symptoms of depression had no  
47 contacts at all. A Swedish follow-up study on more than 2,000 respondents with symptoms of depression  
48 (MDI>20) or anxiety likewise found that one third did not seek care at all. People with a higher education were  
49 less likely to seek care at all, and if they did, they more often sought help by a psychologist<sup>43</sup>. Other studies  
50 report that 35 – 52% of respondents with symptoms of severe common mental disorders have no treatment  
51 contacts<sup>36;44</sup>. As in the Swedish study, we found that respondents with a longer education were less likely to  
52 have contacts at all, compared to respondents without education, but not in the group with symptoms of  
53 depression.  
54  
55

56  
57 This finding could be explained by no actual need despite the symptom scores, or it could be due to the  
58 patient's choice.  
59



1  
2  
3 It has been argued that the instruments used, most commonly the *Composite International Diagnostic*  
4 *Interview (CIDI)*, generate inflated prevalence estimates of depression due to a high number of false positives  
5 and are thus overestimating unmet needs<sup>45</sup>. A recent publication from the Netherlands Mental Health Survey  
6 and Incidence Study (NEMESIS-1) found most respondents who met the criteria for a common mental disorder  
7 to remit without treatment, and it supports the argument that the diagnostic criteria in large epidemiological  
8 samples do not necessarily indicate a need for mental health treatment<sup>46</sup>.

9  
10  
11 Whether or not unmet needs are overestimated in these studies, they would not have an impact on the  
12 socioeconomic comparisons within the studies, though.

13  
14 A French mixed method study found the patients' reasons for not consulting a GP during a depressive episode  
15 to be the negative perception of treatment, the negative perception of the disease, the importance of the  
16 social environment, and the doctor-patient relationship. The negative perception of depression was the  
17 dominant reason for not consulting the GP and covered feelings of low self-worth and stigmatization, whereas  
18 social support was a reason for not feeling a need to consult a GP<sup>47</sup>.

19  
20  
21 Secondly, 47% of the 547 respondents with symptoms of moderate to severe depression had consultation by  
22 GP and no additional treatment. GPs' ability to detect depression could be questioned. When compared to  
23 ratings by semi-structured interviews, the detection rates for depression in primary health care are relatively  
24 low with a sensitivity rate of 50% and a specificity rate of 81%<sup>48</sup>, and more recently, a sensitivity rate of 51%  
25 and a specificity rate of 87%, when compared to the Patient Health Questionnaire-9<sup>49</sup>. The use of depression  
26 scoring tools validated for primary care could improve detection rates; if self-administered, it will be a less  
27 time-consuming and a more realistic approach<sup>49</sup>. It is noteworthy that the proportion having the highest  
28 treatment level at a GP was the same across educational groups.

### 29 30 31 32 33 *No need & use*

34 The group treated, but not in need, may indicate an overuse of services. "No-need" reflects a low symptom  
35 score on the MDI. The actual need was not known within the six months, and the term should be taken with  
36 this reservation. However, we consider a comparison across educational groups relevant in this group, as in the  
37 other symptoms groups.

38  
39  
40 Firstly, we found no/ few symptoms of depression associated with more use of specialized mental health  
41 services for respondents with short and longer education compared to those with no education, when adjusted  
42 for age, gender and present treatment. Whereas the treatment of respondents with symptoms of depression  
43 seems to indicate needs met, this finding could indicate the so-called "met un-need"<sup>50</sup>. For patients with  
44 longer education and no/few symptoms, the GPs prescribed less antidepressants and more often referred to a  
45 psychologist. Two thirds of the specialized services were used by the group with no/few symptoms.

46  
47  
48 An Australian study found that only a small proportion (4%) of individuals without any disorders or need  
49 indicators did receive mental health care. Though this group comprised a fair proportion of service users, the  
50 vast majority only sought brief primary care or counselling treatment rather than consultations with  
51 psychiatrists, where they constituted 7% of all patients<sup>51</sup>. This study did not relate the use of services to SEP.  
52 However, a Canadian study did find individuals using mental health care and having no symptom of mental  
53 disorders to be better educated, compared to those with mental disorders using the services<sup>16</sup>.

1  
2  
3 Secondly, we found that prescription of antidepressants was more common in the group with no/few  
4 symptoms and no education. Similar findings were shown in another Australian study, where low SEP was  
5 associated with higher prescription rates not attributable to higher rates of depression<sup>52</sup>. It could be due to  
6 maintenance treatment that it is more common among persons in low SEP, which is plausible as depressive  
7 disorders are more prevalent in this group too. Alternatively, it could be due to prescription of antidepressants  
8 instead of referral to a psychologist, because of the expenses associated with the treatment. It could be due to  
9 the GP's assessment of the patient's capacity to engage in that type of treatment. A combination of all is also  
10 possible.  
11  
12

### 13 *Implications*

14 For clinicians and policy makers it is of particular interest to know that this study showed that GPs treated  
15 patients with no/few symptoms of depression differently. Patients in higher SEP were more likely to be  
16 referred to specialist services, primary psychologists, while patients in lower SEP were more likely to be treated  
17 with antidepressants. This difference was most likely due to the expenses associated with the use of  
18 psychologists in Denmark<sup>53</sup> and is in consistence with other studies<sup>54;55</sup>. If, or to what extent, the capacity to  
19 engage in e.g. cognitive therapy is related to educational groups in general, or among survey responders in  
20 particular, is not known.  
21  
22  
23

24 Future research could explore why relatively many patients with symptoms of moderate to severe symptoms  
25 of depression do not consult their GP. It would also be of interest to know to what extent the GP prescribes  
26 antidepressant treatment when a psychologist might have been the first choice, given the access was free.  
27  
28  
29

30 We found equal treatment for patients in equal need, but unequal treatment of patients in seemingly no need.  
31 It would be interesting to explore in future research if this differentiation in use of specialist services is also  
32 found in somatic health care, which means that mild symptoms are treated differently depending on SEP, but  
33 severe symptoms are not.  
34  
35  
36

### 37 **Conclusion**

38 We found no socioeconomic differentiation in the treatment of respondents with symptoms of depression.  
39 However, GPs treated patients with no/few symptoms of depression differently. Patients in higher SEP were  
40 more likely to receive specialist services by primary psychologists, whereas patients in a lower SEP were more  
41 likely to be treated with antidepressants, which is most likely due to the difference in the associated expenses  
42 for the patient.  
43  
44  
45  
46  
47  
48  
49  
50  
51  
52  
53  
54

### 55 **Author contributions.**

56  
57  
58  
59  
60

1  
2 The statistical analyses were performed by statistician SW. AP conceived the research and wrote the first draft  
3 of the manuscript assisted by FBW. FBW contributed substantially to the study design and choice of analysis.  
4 AH, ES, and LH contributed to the data analysis, interpretation of results and critical revision of the manuscript.  
5  
6

### 7 **Acknowledgement**

8 With acknowledgment to Mogens Vestergaard professor Department of Public Health, Aarhus University,  
9 Denmark for comments and contributions in the initial stage of the study. We thank GESUS for sharing data,  
10 the Health Research Foundation of Region Zealand for financial support, and former head nurse Tove Kjærbo  
11 for initiating the study.  
12  
13

14 Data sharing: no additional data available.  
15  
16  
17  
18  
19  
20  
21  
22  
23  
24  
25  
26  
27  
28  
29  
30  
31  
32  
33  
34  
35  
36  
37  
38  
39  
40  
41  
42  
43  
44  
45  
46  
47  
48  
49  
50  
51  
52  
53  
54  
55  
56  
57  
58  
59  
60

## Reference List

- 1  
2  
3  
4  
5  
6  
7 (1) OECD. Health policies and data: Health Inequalities. 11-6-2017. Ref Type: Online Source
- 8  
9 (2) World Health Organization. Health 2020. A European policy framework and strategy for the 21st  
10 century. 1-184. 2013. Copenhagen, WHO Regional Office for Europe. Ref Type: Report
- 11  
12 (3) Lynch JW, Kaplan GA, Shema SJ. Cumulative impact of sustained economic hardship on physical,  
13 cognitive, psychological, and social functioning. *N Engl J Med* 1997; 337(26):1889-1895.
- 14  
15 (4) Ahnquist J, Wamala SP. Economic hardships in adulthood and mental health in Sweden. The Swedish  
16 National Public Health Survey 2009 236. *BMC Public Health* 2011; 11:788. doi: 10.1186/1471-2458-11-  
17 788.:788-11.
- 18  
19 (5) Lorant V, Deliege D, Eaton W, Robert A, Philippot P, Anseau M. Socioeconomic inequalities in  
20 depression: a meta-analysis. *Am J Epidemiol* 2003; 157(2):98-112.
- 21  
22 (6) Lorant V, Croux C, Weich S, Deliege D, Mackenbach J, Anseau M. Depression and socio-economic risk  
23 factors: 7-year longitudinal population study. *Br J Psychiatry* 2007; 190:293-8.:293-298.
- 24  
25 (7) World Health Organization. Depression and Other Common Mental Disorders: Global Health Estimates.  
26 1-24. 2017. Geneva, WHO. Ref Type: Report
- 27  
28 (8) Laursen TM, Musliner KL, Benros ME, Vestergaard M, Munk-Olsen T. Mortality and life expectancy in  
29 persons with severe unipolar depression. *J Affect Disord* 2016; 193:203-7. doi:  
30 10.1016/j.jad.2015.12.067. Epub;%2016 Jan 6.:203-207.
- 31  
32 (9) Goddard M, Smith P. Equity of access to health care services: theory and evidence from the UK. *Soc Sci*  
33 *Med* 2001; 53(9):1149-1162.
- 34  
35 (10) Fjaer EL, Balaj M, Stornes P, Todd A, McNamara CL, Eikemo TA. Exploring the differences in general  
36 practitioner and health care specialist utilization according to education, occupation, income and social  
37 networks across Europe: findings from the European social survey (2014) special module on the social  
38 determinants of health. *Eur J Public Health* 2017; 27(suppl\_1):73-81.
- 39  
40 (11) Hanratty B, Zhang T, Whitehead M. How close have universal health systems come to achieving equity  
41 in use of curative services? A systematic review. *Int J Health Serv* 2007; 37(1):89-109.
- 42  
43 (12) ten Have M, Iedema J, Ormel J, Vollebergh W. Explaining service use for mental health problems in the  
44 Dutch general population: the role of resources, emotional disorder and functional impairment 246.  
45 *Soc Psychiatry Psychiatr Epidemiol* 2006; 41(4):285-293.
- 46  
47 (13) Andrews G, Issakidis C, Carter G. Shortfall in mental health service utilisation. *Br J Psychiatry* 2001;  
48 179:417-25.:417-425.
- 49  
50 (14) Kohn R, Saxena S, Levav I, Saraceno B. The treatment gap in mental health care. *Bull World Health*  
51 *Organ* 2004; 82(11):858-866.
- 52  
53  
54  
55  
56  
57  
58  
59  
60

- 1  
2  
3 (15) Lin E, Goering P, Offord DR, Campbell D, Boyle MH. The use of mental health services in Ontario:  
4 epidemiologic findings. *Can J Psychiatry* 1996; 41(9):572-577.  
5  
6 (16) Fleury MJ, Ngui AN, Bamvita JM, Grenier G, Caron J. Predictors of healthcare service utilization for  
7 mental health reasons. *Int J Environ Res Public Health* 2014; 11(10):10559-10586.  
8  
9 (17) Pedersen KM, Andersen JS, Sondergaard J. General practice and primary health care in Denmark. *J Am*  
10 *Board Fam Med* 2012; 25 Suppl 1:S34-8. doi: 10.3122/jabfm.2012.02.110216.:S34-S38.  
11  
12 (18) Larsen A. Psykologbehandling. 29-9-2014. [www.sundhed.dk](http://www.sundhed.dk). Ref Type: Online Source  
13  
14 (19) Bergholdt HK, Bathum L, Kvetny J, Rasmussen DB, Moldow B, Hoeg T et al. Study design, participation  
15 and characteristics of the Danish General Suburban Population Study. *Dan Med J* 2013; 60(9):A4693.  
16  
17 (20) Økonomi- og Indenrigsministeriet. [Equalizing between municipalities and general subsidizes 2014]  
18 Kommunal udligning og generelle tilskud 2014. Økonomi- og Indenrigsministeriet, editor. 1-246. 2013.  
19 København, Økonomi- og Indenrigsministeriet. Ref Type: Report  
20  
21  
22 (21) Pedersen CB. The Danish Civil Registration System. *Scand J Public Health* 2011; 39(7 Suppl):22-25.  
23  
24 (22) Olsen LR, Jensen DV, Noerholm V, Martiny K, Bech P. The internal and external validity of the Major  
25 Depression Inventory in measuring severity of depressive states. *Psychol Med* 2003; 33(2):351-356.  
26  
27 (23) WHO. ICD-10 International statistical classification of diseases and related problems. 10th ed. Geneva:  
28 WHO; 2016.  
29  
30 (24) Bech P, Timmerby N, Martiny K, Lunde M, Soendergaard S. Psychometric evaluation of the Major  
31 Depression Inventory (MDI) as depression severity scale using the LEAD (Longitudinal Expert  
32 Assessment of All Data) as index of validity. *BMC Psychiatry* 2015; 15:190. doi: 10.1186/s12888-015-  
33 0529-3.:190-0529.  
34  
35  
36 (25) Sundhedsstyrelsen. [Referenceprogram for treatment of unipolar depression in adults]. Sekretariatet  
37 for Referenceprogrammer (SfR), editor. 1-138. 1-11-2007. Copenhagen, Sundhedsstyrelsen. Ref Type:  
38 Report  
39  
40 (26) Bech P. Clinical Psychometrics. First ed. Oxford: John Wiley & Sons, Ltd.; 2012. 153.  
41  
42 (27) Galobardes B, Shaw M, Lawlor DA, Lynch JW, Davey SG. Indicators of socioeconomic position (part 1). *J*  
43 *Epidemiol Community Health* 2006; 60(1):7-12.  
44  
45 (28) Andersen JS, Olivarius NF, Krasnik A. The Danish National Health Service Register. *Scand J Public Health*  
46 2011; 39(7 Suppl):34-37.  
47  
48 (29) Kildemoes HW, Sorensen HT, Hallas J. The Danish National Prescription Registry. *Scand J Public Health*  
49 2011; 39(7 Suppl):38-41.  
50  
51 (30) WHO Collaborating Centre for Drug Statistics Metodologi. Guidelines for ATC classification and DDD  
52 assignment 2014. 17 ed. Oslo: Norwegian Institute of Public Health; 2013.  
53  
54 (31) Lynge E, Sandegaard JL, Rebolj M. The Danish National Patient Register. *Scand J Public Health* 2011;  
55 39(7 Suppl):30-33.  
56  
57  
58  
59

- 1  
2  
3 (32) Stata Statistical Software: Release 14. [ College Station,TX:StataCorp LP.]; 2015.  
4  
5 (33) Statistics Denmark. StatBank Denmark. [www.statistikbanken.dk](http://www.statistikbanken.dk) . 2015. Statistics Denmark. 25-11-  
6 2015. Ref Type: Online Source  
7  
8 (34) Brusco NK, Watts JJ. Empirical evidence of recall bias for primary health care visits. *BMC Health Serv*  
9 *Res* 2015; 15:381. doi: 10.1186/s12913-015-1039-1.:381-1039.  
10  
11 (35) McCracken C, Dalgard OS, Ayuso-Mateos JL, Casey P, Wilkinson G, Lehtinen V et al. Health service use  
12 by adults with depression: Community survey in five European countries - Evidence from the ODIN  
13 study. *British Journal of Psychiatry* 2006; 189(AUG.):August.  
14  
15 (36) Gabilondo A, Rojas-Farreras S, Rodriguez A, Fernandez A, Pinto-Meza A, Vilagut G et al. Use of primary  
16 and specialized mental health care for a major depressive episode in Spain by ESEMeD respondents.  
17 *Psychiatr Serv* 2011; 62(2):152-161.  
18  
19 (37) Glozier N, Davenport T, Hickie IB. Identification and management of depression in Australian primary  
20 care and access to specialist mental health care. *Psychiatr Serv* 2012; 63(12):1247-1251.  
21  
22 (38) Dey M, Jorm AF. Social determinants of mental health service utilization in Switzerland. *Int J Public*  
23 *Health* 2017; 62(1):85-93.  
24  
25 (39) ten Have M, Nuyen J, Beekman A, de Graaf R. Common mental disorder severity and its association  
26 with treatment contact and treatment intensity for mental health problems 242. *Psychol Med* 2013;1-  
27 11.  
28  
29 (40) Hansen AH, Halvorsen PA, Ringberg U, Forde OH. Socio-economic inequalities in health care utilisation  
30 in Norway: a population based cross-sectional survey. *BMC Health Serv Res* 2012; 12:336. doi:  
31 10.1186/1472-6963-12-336.:336-12.  
32  
33 (41) ten Have M, Oldehinkel A, Vollebergh W, Ormel J. Does educational background explain inequalities in  
34 care service use for mental health problems in the Dutch general population? *Acta Psychiatr Scand*  
35 2003; 107:178-187.  
36  
37 (42) Vasiliadis HM, Tempier R, Lesage A, Kates N. General practice and mental health care: determinants of  
38 outpatient service use. *Can J Psychiatry* 2009; 54(7):468-476.  
39  
40 (43) Wallerblad A, Moller J, Forsell Y. Care-Seeking Pattern among Persons with Depression and Anxiety: A  
41 Population-Based Study in Sweden. *Int J Family Med* 2012; 2012:895425. doi: 10.1155/2012/895425.  
42 Epub;%2012 May 10.:895425.  
43  
44 (44) Perkins D, Fuller J, Kelly BJ, Lewin TJ, Fitzgerald M, Coleman C et al. Factors associated with reported  
45 service use for mental health problems by residents of rural and remote communities: cross-sectional  
46 findings from a baseline survey. *BMC Health Serv Res* 2013; 13:157. doi: 10.1186/1472-6963-13-  
47 157.:157-13.  
48  
49 (45) Kurdyak PA, Gnam WH. Small signal, big noise: performance of the CIDI depression module. *Can J*  
50 *Psychiatry* 2005; 50(13):851-856.  
51  
52  
53  
54  
55  
56  
57  
58  
59  
60

- 1  
2  
3 (46) Wang Y, Henriksen CA, Ten HM, de GR, Stein MB, Enns MW et al. Common Mental Disorder Diagnosis  
4 and Need for Treatment are Not the Same: Findings from the NEMESIS Study. *Adm Policy Ment Health*  
5 2016.
- 6  
7 (47) Rondet C, Parizot I, Cadwallader JS, Lebas J, Chauvin P. Why underserved patients do not consult their  
8 general practitioner for depression: results of a qualitative and a quantitative survey at a free  
9 outpatient clinic in Paris, France. *BMC Fam Pract* 2015; 16:57. doi: 10.1186/s12875-015-0273-2.:57-  
10 0273.
- 11  
12 (48) Mitchell AJ, Vaze A, Rao S. Clinical diagnosis of depression in primary care: a meta-analysis. *Lancet*  
13 2009; 374(9690):609-619.
- 14  
15 (49) Carey M, Jones K, Meadows G, Sanson-Fisher R, D'Este C, Inder K et al. Accuracy of general practitioner  
16 unassisted detection of depression. *Aust N Z J Psychiatry* 2014; 48(6):571-578.
- 17  
18 (50) Jorm AF. 'Unmet need' and 'met un-need' in mental health services: artefacts of a categorical view of  
19 mental health problems. *Epidemiol Psychiatr Sci* 2017;1-2.
- 20  
21  
22 (51) Bobevski I, Rosen A, Meadows G. Mental health service use and need for care of Australians without  
23 diagnoses of mental disorders: findings from a large epidemiological survey. *Epidemiol Psychiatr Sci*  
24 2017; %19:1-11. doi: 10.1017/S2045796017000300.:1-11.
- 25  
26 (52) Butterworth P, Olesen SC, Leach LS. Socioeconomic differences in antidepressant use in the PATH  
27 Through Life Study: evidence of health inequalities, prescribing bias, or an effective social safety net? *J*  
28 *Affect Disord* 2013; 149(1-3):75-83.
- 29  
30  
31 (53) Kiil A, Houlberg K. How does copayment for health care services affect demand, health and  
32 redistribution? A systematic review of the empirical evidence from 1990 to 2011. *Eur J Health Econ*  
33 2014; 15(8):813-828.
- 34  
35 (54) Chaupain-Guillot S, Guillot O. Health system characteristics and unmet care needs in Europe: an  
36 analysis based on EU-SILC data. *Eur J Health Econ* 2015; 16(7):781-796.
- 37  
38 (55) Gundgaard J. Income-related inequality in utilization of health services in Denmark: evidence from  
39 Funen County. *Scand J Public Health* 2006; 34(5):462-471.
- 40  
41  
42  
43  
44  
45  
46  
47  
48  
49  
50  
51  
52  
53  
54  
55  
56  
57  
58  
59  
60



Impact of socioeconomic position on symptoms of depression and subsequent mental health care treatment: a Danish six-month register-based follow-up study on a population survey.

**Supplementary figure and tables**

Figure 1

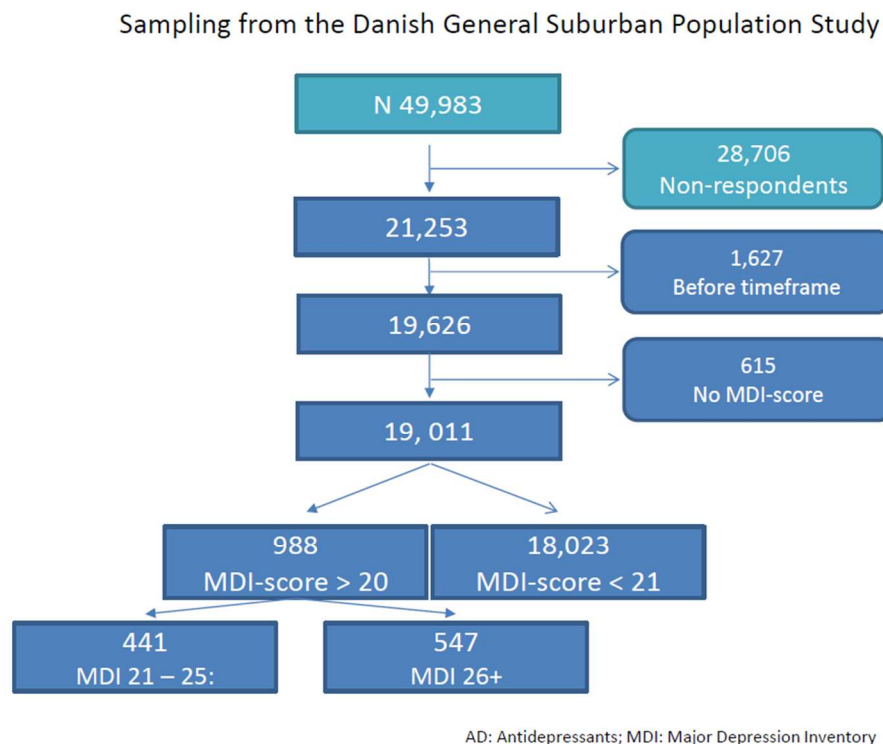

Supplement Table1. Definition of treatment levels:

| Level | Primary health care | Additional health care supply      | Defined by source and code:                             |
|-------|---------------------|------------------------------------|---------------------------------------------------------|
| 0     | No contact          |                                    | Not in NPR, NHR, NPrR                                   |
| 1     | GP                  | Consultation                       | + NHR GP (800101 + 800120 + (800411 – 800491) + 804001) |
| 2     | GP                  | Mental health counselling by GP    | + NHR GP & contact concerning mental health (806101)    |
| 3     | GP                  | Antidepressants                    | + NPrR by ATC: NO6A – excl N06AX12                      |
| 4     | GP                  | Private psychologist               | +NHR (630110 – 630211) + (630214 – 630340)              |
| 5     | GP                  | Private psychiatrist               | +NHR (240110 – 240140) + (240210 – 240236) + 241401     |
| 6     | GP                  | Out-patient psychiatry             | +NPR by ICD-10: F 00– F99.99                            |
| 7     | GP                  | Mental hospital & Emergency visits | +NPR by ICD-10: F 00– F99.99                            |

NPR: The National Patient Register; NHR: The National Health Service Register; NPrR: The National Prescription Registry; ATC: Anatomical Therapeutic Chemical classification.



Impact of socioeconomic position on symptoms of depression and subsequent mental health care treatment:  
a Danish six-month register-based follow-up study on a population survey.

**Supplement Table 2. Number and mean number of Mental health care treatments by MDI grade**

| Symptoms of depression          | No/few       | Mild       | Moderate/severe | Total        |
|---------------------------------|--------------|------------|-----------------|--------------|
| Persons n (Pct.)                | 18023 (100)  | 441 (100)  | 547 (100)       | 19011 (100)  |
| <b>No contact</b>               |              |            |                 |              |
| Persons n (Pct.)                | 4540 (25.2)  | 73 (16.6)  | 56 (10.2)       | 4669 (24.6)  |
| <b>GP consultation</b>          |              |            |                 |              |
| Persons n (Pct.)                | 13329 (74.0) | 356 (80.7) | 474 (86.7)      | 14159 (74.5) |
| Visits n                        | 45044        | 1433       | 2252            | 48729        |
| Visit rates $\bar{x}$           | 3.38         | 4.03       | 4.75            | 3.44         |
| <b>GP MHC</b>                   |              |            |                 |              |
| Persons n (Pct.)                | 329 (1.8)    | 28 (6.3)   | 64 (11.7)       | 421 (2.2)    |
| Visits n                        | 611          | 57         | 168             | 836          |
| Visit rates $\bar{x}$           | 1.86         | 2.04       | 2.63            | 1.99         |
| <b>Antidepressants#</b>         |              |            |                 |              |
| Persons n (Pct.)                | 1056 (5.9)   | 87 (29.7)  | 186 (34.0)      | 1329 (7.0)   |
| Prescriptions n                 | 2769         | 227        | 670             | 3666         |
| Prescrip rates $\bar{x}$        | 2.62         | 2.61       | 3.60            | 2.76         |
| <b>Psychologists</b>            |              |            |                 |              |
| Persons n (Pct.)                | 167 (0.9)    | 19 (4.3)   | 31 (5.7)        | 217 (1.1)    |
| Visits n                        | 706          | 112        | 144             | 962          |
| Visit rates $\bar{x}$           | 4.23         | 5.89       | 4.65            | 4.43         |
| <b>Private psychiatrist</b>     |              |            |                 |              |
| Persons n (Pct.)                | 100 (0.6)    | 20 (4.5)   | 42 (7.7)        | 162 (0.9)    |
| Visits n                        | 274          | 57         | 201             | 532          |
| Visit rates $\bar{x}$           | 2.74         | 2.85       | 4.79            | 3.28         |
| <b>Out-patient Psychiatry</b>   |              |            |                 |              |
| Persons n (Pct.)                | 22 (0.1)     | 4 (0.9)    | 9 (1.6)         | 35 (0.2)     |
| Visits n                        | 103          | 34         | 46              | 183          |
| Visit rates $\bar{x}$           | 4.68         | 8.50       | 5.11            | 5.23         |
| <b>Specialized services*</b>    |              |            |                 |              |
| Persons n (Pct.)                | 283 (1.6)    | 40 (9.1)   | 76 (13.9)       | 399 (2.1)    |
| Visits n                        | 1083         | 203        | 391             | 1677         |
| Visit rates $\bar{x}$           | 3.83         | 5.07       | 5.14            | 4.20         |
| <b>Admission MH &amp; EA **</b> |              |            |                 |              |
| Persons n (Pct.)                | 33 (0.2)     | 4 (0.9)    | 14 (2.6)        | 51 (0.3)     |
| Visits n                        | 49           | 11         | 37              | 97           |
| Visit rates $\bar{x}$           | 1.48         | 2.75       | 2.64            | 1.90         |

$\bar{x}$  Mean number of visits by respondents using the service/prescriptions

# Reimbursed prescriptions

\* Contact to either psychologist or psychiatrist, public or private

\*\* MH: Mental hospital; EA: Emergency access psychiatric ward

STROBE Statement for the study: **Impact of socioeconomic position on symptoms of depression and subsequent health care utilization and treatment: a Danish six-month register-based follow-up on a survey study.**

|                              | Item No | Recommendation                                                                                                                                                                                    | Addressed on page:  |
|------------------------------|---------|---------------------------------------------------------------------------------------------------------------------------------------------------------------------------------------------------|---------------------|
| <b>Title and abstract</b>    | 1       | (a) Indicate the study's design with a commonly used term in the title or the abstract                                                                                                            | 1                   |
|                              |         | (b) Provide in the abstract an informative and balanced summary of what was done and what was found                                                                                               | 2                   |
| <b>Introduction</b>          |         |                                                                                                                                                                                                   |                     |
| Background/rationale         | 2       | Explain the scientific background and rationale for the investigation being reported                                                                                                              | 3                   |
| Objectives                   | 3       | State specific objectives, including any prespecified hypotheses                                                                                                                                  | 3                   |
| <b>Methods</b>               |         |                                                                                                                                                                                                   |                     |
| Study design                 | 4       | Present key elements of study design early in the paper                                                                                                                                           | 4                   |
| Setting                      | 5       | Describe the setting, locations, and relevant dates, including periods of recruitment, exposure, follow-up, and data collection                                                                   | 4                   |
| Participants                 | 6       | (a) Give the eligibility criteria, and the sources and methods of selection of participants. Describe methods of follow-up                                                                        | 4 - 5               |
|                              |         | (b) For matched studies, give matching criteria and number of exposed and unexposed                                                                                                               |                     |
| Variables                    | 7       | Clearly define all outcomes, exposures, predictors, potential confounders, and effect modifiers. Give diagnostic criteria, if applicable                                                          | 4 - 5<br>Table 1    |
| Data sources/<br>measurement | 8*      | For each variable of interest, give sources of data and details of methods of assessment (measurement). Describe comparability of assessment methods if there is more than one group              | 4 - 5<br>Table 1    |
| Bias                         | 9       | Describe any efforts to address potential sources of bias                                                                                                                                         |                     |
| Study size                   | 10      | Explain how the study size was arrived at                                                                                                                                                         | 4 + 7 &<br>Figure 1 |
| Quantitative variables       | 11      | Explain how quantitative variables were handled in the analyses. If applicable, describe which groupings were chosen and why                                                                      | 5 - 6               |
| Statistical methods          | 12      | (a) Describe all statistical methods, including those used to control for confounding                                                                                                             | 5 - 6               |
|                              |         | (b) Describe any methods used to examine subgroups and interactions                                                                                                                               |                     |
|                              |         | (c) Explain how missing data were addressed                                                                                                                                                       | 7                   |
|                              |         | (d) If applicable, explain how loss to follow-up was addressed                                                                                                                                    | 4                   |
|                              |         | (e) Describe any sensitivity analyses                                                                                                                                                             |                     |
| <b>Results</b>               |         |                                                                                                                                                                                                   |                     |
| Participants                 | 13*     | (a) Report numbers of individuals at each stage of study—eg numbers potentially eligible, examined for eligibility, confirmed eligible, included in the study, completing follow-up, and analysed | 7                   |
|                              |         | (b) Give reasons for non-participation at each stage                                                                                                                                              | Figure 1            |
|                              |         | (c) Consider use of a flow diagram                                                                                                                                                                | Figure 1            |
| Descriptive data             | 14*     | (a) Give characteristics of study participants (eg demographic, clinical, social) and information on exposures and potential confounders                                                          | Table 2             |
|                              |         | (b) Indicate number of participants with missing data for each variable of interest                                                                                                               | Table 2             |
|                              |         | (c) Summarise follow-up time (eg, average and total amount)                                                                                                                                       |                     |

|    |                          |     |                                                                                  |             |
|----|--------------------------|-----|----------------------------------------------------------------------------------|-------------|
| 1  | Outcome data             | 15* | Report numbers of outcome events or summary measures over time                   |             |
| 2  | Main results             | 16  | (a) Give unadjusted estimates and, if applicable, confounder-adjusted            | Table 3     |
| 3  |                          |     | estimates and their precision (eg, 95% confidence interval). Make clear          | Table 4 + 5 |
| 4  |                          |     | which confounders were adjusted for and why they were included                   |             |
| 5  |                          |     | (b) Report category boundaries when continuous variables were categorized        | 4           |
| 6  |                          |     | (c) If relevant, consider translating estimates of relative risk into absolute   |             |
| 7  |                          |     | risk for a meaningful time period                                                |             |
| 8  | Other analyses           | 17  | Report other analyses done—eg analyses of subgroups and interactions, and        | 7           |
| 9  |                          |     | sensitivity analyses                                                             |             |
| 10 | <b>Discussion</b>        |     |                                                                                  |             |
| 11 | Key results              | 18  | Summarise key results with reference to study objectives                         | 8           |
| 12 | Limitations              | 19  | Discuss limitations of the study, taking into account sources of potential       | 8           |
| 13 |                          |     | bias or imprecision. Discuss both direction and magnitude of any potential       |             |
| 14 |                          |     | bias                                                                             |             |
| 15 | Interpretation           | 20  | Give a cautious overall interpretation of results considering objectives,        | 8 - 10      |
| 16 |                          |     | limitations, multiplicity of analyses, results from similar studies, and other   |             |
| 17 |                          |     | relevant evidence                                                                |             |
| 18 | Generalisability         | 21  | Discuss the generalisability (external validity) of the study results            | 10          |
| 19 | <b>Other information</b> |     |                                                                                  |             |
| 20 | Funding                  | 22  | Give the source of funding and the role of the funders for the present study     | 1           |
| 21 |                          |     | and, if applicable, for the original study on which the present article is based |             |

\*Give information separately for exposed and unexposed groups.

**Note:** An Explanation and Elaboration article discusses each checklist item and gives methodological background and published examples of transparent reporting. The STROBE checklist is best used in conjunction with this article (freely available on the Web sites of PLoS Medicine at <http://www.plosmedicine.org/>, Annals of Internal Medicine at <http://www.annals.org/>, and Epidemiology at <http://www.epidem.com/>). Information on the STROBE Initiative is available at <http://www.strobe-statement.org>.

# BMJ Open

## Socioeconomic position, symptoms of depression, and subsequent mental health care treatment: a Danish register-based six-month follow-up study on a population survey.

|                                 |                                                                                                                                                                                                                                                                                                                                                                                                                                                                                                                                                                                                                                                 |
|---------------------------------|-------------------------------------------------------------------------------------------------------------------------------------------------------------------------------------------------------------------------------------------------------------------------------------------------------------------------------------------------------------------------------------------------------------------------------------------------------------------------------------------------------------------------------------------------------------------------------------------------------------------------------------------------|
| Journal:                        | <i>BMJ Open</i>                                                                                                                                                                                                                                                                                                                                                                                                                                                                                                                                                                                                                                 |
| Manuscript ID                   | bmjopen-2017-020945.R1                                                                                                                                                                                                                                                                                                                                                                                                                                                                                                                                                                                                                          |
| Article Type:                   | Research                                                                                                                                                                                                                                                                                                                                                                                                                                                                                                                                                                                                                                        |
| Date Submitted by the Author:   | 04-Apr-2018                                                                                                                                                                                                                                                                                                                                                                                                                                                                                                                                                                                                                                     |
| Complete List of Authors:       | Packness, Aake; Syddansk Universitet Det Sundhedsvidenskabelige Fakultet, Public Health; Psykiatrien i Region Sjælland, Psychiatric Research Unit<br>Halling, Anders; Linnaeus Universitetet Institutionen for sprak, Department of Medicine and Optometry<br>Hastrup, Lene; Psykiatrien i Region Sjælland, Psychiatric Research Unit<br>Simonsen, Erik; Psykiatrien i Region Sjælland, Psychiatric Research Unit<br>Wehberg, Sonja; Syddansk Universitet Institut for Sundhedstjenesteforskning, Department of Public Health<br>Waldorff, Frans; University of Southern Denmark, Research Unit for General Practice, Health Science Department |
| <b>Primary Subject Heading</b>: | Health services research                                                                                                                                                                                                                                                                                                                                                                                                                                                                                                                                                                                                                        |
| Secondary Subject Heading:      | Mental health, General practice / Family practice, Health policy, Public health, Epidemiology                                                                                                                                                                                                                                                                                                                                                                                                                                                                                                                                                   |
| Keywords:                       | Depression & mood disorders < PSYCHIATRY, Common Mental Disorders, Access, PUBLIC HEALTH, PRIMARY CARE, Equity                                                                                                                                                                                                                                                                                                                                                                                                                                                                                                                                  |
|                                 |                                                                                                                                                                                                                                                                                                                                                                                                                                                                                                                                                                                                                                                 |

SCHOLARONE™  
Manuscripts

1  
2  
3  
4  
5 **Socioeconomic position, symptoms of depression, and subsequent mental health care treatment: a Danish**  
6 **register-based six-month follow-up study on a population survey.**  
7

8 A Packness, A Halling, LH Hastrup, E Simonsen, S Wehberg, FB Waldorff  
9

10  
11 Department of Public Health, University of Southern Denmark, DK-5000 Odense, Denmark. Aake Packness, MPH,  
12 Research Unit for General Practice, University of Southern Denmark. Anders Halling, professor, Department of  
13 Medicine and Optometry, Faculty of Health and Life Sciences, Linnaeus University, SE-391 85 Kalmar, Sweden.  
14 Lene H Hastrup, senior researcher, Psychiatric Research Unit, Region of Zealand, DK-4200 Slagelse, Denmark. Erik  
15 Simonsen, professor, Department of Clinical Medicine, University of Copenhagen, Psychiatric Research Unit,  
16 Region of Zealand, Denmark. Sonja Wehberg, statistician, Department of Public Health and Research Unit of  
17 Clinical Epidemiology, Institute of Clinical Research, University of Southern Denmark, DK-5000 Odense, Denmark.  
18 Frans B Waldorff, professor, Department of Public Health, University of Southern Denmark, DK-5000 Odense,  
19 Denmark.  
20

21  
22 Correspondence to: A Packness [apackness@health.sdu.dk](mailto:apackness@health.sdu.dk)  
23 ORCID-0000-0002-4695-6214  
24

25 Research Unit of General Practice, Institute of Public Health, J.B. Winsløvs Vej 9A, DK-5000 Odense C, Denmark.  
26 Telephone: +45 20537264  
27

28  
29  
30 Word count: 4,763  
31

32  
33 The Corresponding Author has the right to grant on behalf of all authors and does grant on behalf of all authors an  
34 exclusive licence on a worldwide basis to the BMJ Publishing Group Ltd to permit this article (if accepted) to be  
35 published in BMJ editions and any other BMJGL products and sub-licences such use and exploit all subsidiary  
36 rights, as set out in our licence.  
37

38 All authors have completed the Unified Competing Interest form (available on request from the corresponding  
39 author) and declare: no support from any organisation for the submitted, no financial relationships with any  
40 organisations that might have an interest in the submitted work in the previous three years, and no other  
41 relationships or activities that could appear to have influenced the submitted work.  
42

43  
44 Funding: The study has been supported by an unrestricted grant (No 15-000342) from the Health Research  
45 Foundation of Region Zealand.  
46

47 **Transparency declaration**

48 Aake Packness affirms that this manuscript is an honest, accurate, and transparent account of the study being  
49 reported, that no important aspects of the study have been omitted, and that any discrepancies from the study as  
50 planned have been explained.  
51  
52  
53  
54  
55  
56  
57  
58  
59  
60

## Abstract

**Objective:** Examine whether the severity of symptoms of depression were associated with the type of mental health care treatment (MHCT) received, independent of socioeconomic position (SEP).

**Design:** Register-based six-month follow-up study on participants from the Danish General Suburban Population Study (GESUS) 2010-2013, who scored the Major Depression Inventory (MDI).

**Participants:** 19,011 respondents from GESUS.

**Interventions:** MHCT of the participants was tracked in national registers four months prior and six months after their MDI score. MHCT was graduated in levels. SEP was defined by years of formal postsecondary education and income categorised in three levels. Data was analysed using logistic and Poisson regression analyses.

**Outcomes:** MHCT included number of contacts to: general practitioner (GP), GP mental health counselling, psychologist, psychiatrist, emergency contacts, admissions to mental hospital, and prescriptions of antidepressants.

**Results:** For 547 respondents with moderate to severe symptoms of depression there was no difference across SEP in use of services, contact (y/n), frequency of contact, or level of treatment, except respondents with low SEP had more frequent contact with their GP. However, of the 547, 10% had no treatment contacts at all, and 47% had no treatment beyond GP consultation. Among respondents with no/few symptoms of depression, postsecondary education  $\geq 3$  years was associated with more contact with specialized services (adjusted odds ratio aOR 1.92; 95% confidence interval (CI) 1.18-3.13); however, this difference did not apply for income; additionally, high SEP was associated with fewer prescriptions of antidepressants (education aOR 0.69; CI 0.50-0.95; income aOR 0.56, CI 0.39-0.80) compared to low SEP.

**Conclusion:** Participants with symptoms of depression were treated according to the severity of their symptoms, independent of SEP; however, more than half with moderate to severe symptoms received no treatment beyond GP consultation. People with low SEP and no/few symptoms of depression were more often treated with antidepressants.

The study was approved by The Danish Data Protection Agency Journal number 2015-41-3984.

Accessible at: <https://www.datatilsynet.dk/fortegnelsen/soeg-i-fortegnelsen/>

### Strengths and limitations of this study

- The design of this study, combining data from a population survey on depression symptom-scores with prospective register data on health care use and medication, is unique in health service research on treatment of people with symptoms of depression.
- The study design made it possible to reduce the inherent problem of recall bias in these types of studies.
- The actual reasons for treatment contacts or for prescription of antidepressants were not known, they could have been caused by other disorders than depression.
- The study sample was generally better educated than the population they were sampled from

## Title:

**Socioeconomic position, symptoms of depression, and subsequent mental health care treatment: a Danish register-based six-month follow-up study on a population survey.**

## Introduction

Equal access to health care based on need and the reduction of health inequalities are major policy objectives in most OECD countries<sup>1</sup>. Similarly, the World Health Organization states that addressing social inequalities contributes significantly to health and well-being of individuals and countries<sup>2</sup>.

Sustained economic hardship can lead to poorer physical, psychological, and cognitive functioning<sup>3</sup>, and is furthermore associated with a higher prevalence of mental health problems<sup>4</sup>. Specifically, depressive disorders are more prevalent among people with a low socioeconomic position (SEP)<sup>5</sup> and enhanced by worsening socioeconomic circumstances<sup>6</sup>. In addition to this, depression is a major health problem, globally ranked as the single largest contributor to non-fatal health loss, accounting for 7.5% overall in years lived with disability<sup>7</sup>. It is estimated that life expectancy is reduced by 14 years for men and 10 years for women treated for severe depression<sup>8</sup>.

Equity in access to health care is commonly defined as equal access for equal need. However, both *access* and *need* are ambiguous concepts<sup>9</sup>. It has been documented that patients with a high SEP use more specialized health care services<sup>10,11</sup>, also within mental health care<sup>12</sup>; yet there remains a gap between those in need of mental health care and those who receive it<sup>13-15</sup>. Additionally, not all users of mental health care are in clinical need<sup>16</sup>. As for depression and anxiety disorders, some studies have found access to specialist care to be reflective of clinical need, with little inequity in SEP<sup>17,18</sup>, whereas others report specialized mental health services are not provided to persons with low SEP according to need<sup>19,20</sup>, or that higher SEP is associated with more use of specialized mental health services<sup>21,22</sup>. This uncertainty and the fact that depressive disorders are widespread and more common among persons with lower SEP makes these disorders both relevant and well suited to evaluate the capability of health care systems to address the needs of economically deprived citizens. Depression is a serious disorder with extensive personal, social and economic consequences, which makes its treatment an important issue and health equality an urgent cause.

## Objectives

We aimed to evaluate whether the Danish health care system delivers equal treatment to patients with symptoms of depression. We defined *mental health care treatment* (MCHT) as the use of specific health care services related to the treatment of depressive disorders, as well as treatment with antidepressants.

The objective was to examine if the severity of symptoms of depression (need) was associated with the mental health care treatment received, independent of SEP in both type and frequency of treatments, and highest gained treatment level within six months following a symptom score in a survey study.

## Method

### *Design*

A six-month follow-up study on respondents with symptoms of depression, combining survey data with register data on mental health care treatment.

### **Setting: Danish health care system**



1  
2  
3 Health care is tax-funded in Denmark and free at delivery, except for dental care and visits to psychologists for  
4 adults, which are both partly subsidized<sup>23</sup>. The general practitioner (GP) acts as a gatekeeper to more specialized  
5 care. Treatment by a psychologist is subsidized for patients with specific conditions, such as reaction to specific  
6 traumatic events, moderate depression, and, specifically for citizens between 18 and 38 years, also moderate  
7 anxiety disorders. In 2014, the co-payment for a psychologist appointment was equivalent to 44€ per session<sup>24</sup>.  
8 Each psychologist is obliged to obtain a special authorization from the Danish Supervisory Board of Psychological  
9 Practice in order to be subsidized.  
10

### 11 ***Study population and data sources***

12 The study was conducted as a follow-up study on mental health care utilization and use of antidepressants,  
13 examining participants who scored high on symptoms of depression in the Danish General Suburban Population  
14 Study (GESUS)<sup>25</sup> in the municipality of Næstved, Denmark. The municipality of Næstved is located 90 kilometres  
15 south of the capital Copenhagen. It has a total population of 81,000 and a socioeconomic index score 4% lower  
16 than the 2013 national average<sup>26</sup>. The GESUS data was collected from January 2010 through October 2013. All  
17 citizens over the age of 30 were invited, as were a random selection of one-quarter of citizens between 20 and 30  
18 years of age. The study consists of 21,253 participants, equivalent to 43% of the invited citizens, the median age of  
19 participants were 56 years and 52 years for the non-participants. Data from the self-administered GESUS  
20 questionnaire was used in the present study.  
21  
22  
23  
24  
25

26 Persons with permanent residence in Denmark are registered in the Danish Civil Registration System (CRS)<sup>27</sup> and  
27 are assigned a unique 10-digit identification number, the Central Personal Register Number (CPR). The CPR  
28 number was registered in the survey data and thus provided a way to match respondents with information on  
29 their age and gender, and also made it is possible to identify the individuals in all public data registers in Denmark.  
30 In addition to the data sources already mentioned, data concerning vital status and dates of migration were  
31 gathered from the CRS as well.  
32  
33  
34

35 Using the CPRs from GESUS, we linked to national registers and tracked the use of healthcare services and  
36 antidepressants for four months (120 days) prior and six months (180 days) after the respondents entered the  
37 GESUS study, or until their death or migration, if that occurred before. Data from national registers covered the  
38 years 2010-2014 in order to fit a timeframe of four months prior to index date; however, the sample was reduced  
39 to include only respondents entering the GESUS study from May 2010, due to lack of data availability from 2009.  
40 The period of four months prior to the study was chosen assuming active treatment would include a treatment  
41 appointment or renewed prescription at least every three to four months.  
42  
43  
44

### 45 ***Independent variables***

46 Data on independent variables came from GESUS.  
47

### 48 ***Measure of need***

49 Depression was chosen as an expression of need, with the Major Depression Inventory (MDI) as a measurement  
50 tool, extracted from the GESUS questionnaire. The MDI is based on the 12-item Likert scale and has been found to  
51 have an adequate internal and external validity for defining different stages of depression<sup>28</sup>. The MDI is also based  
52 on the ICD-10 diagnostic criteria for depressive disorder<sup>29</sup>, with scores ranging from 0 to 50: scores  $\leq 20$  do not  
53 indicate depression; mild depression is defined as a score from 21-25; moderate depression from 26-30; and  
54 severe depression from 31-50<sup>30</sup>. In the study, we collapsed moderate and severe depression into the same  
55 category, reducing the categories to three in order to gain statistical power: *no/few symptoms* (summed MDI 0 –  
56  
57  
58  
59  
60



1  
2 20), *mild symptoms* (summed MDI 21-25), and *moderate/severe symptoms* (summed MDI 26+). This splitting of  
3 symptomatic individuals into only two groups (mild or moderate/severe) was supported by the recommended  
4 therapeutic approach at the time: patients with mild symptoms were recommended “watchful waiting” and  
5 perhaps supportive consultations, whereas patients with moderate to severe depression were recommended  
6 antidepressants and therapy by a psychologist or a psychiatrist<sup>31</sup>. If more than two items were missing in the MDI,  
7 the score was categorized as missing<sup>32</sup>.  
8  
9

### 10 11 *Socioeconomic position*

12 SEP is commonly measured by income, occupation, housing tenure, or education; higher education in particular is  
13 known to predict higher response rates in questionnaires<sup>33</sup>. Education and income were chosen as measures of  
14 SEP in this study due to the respondents’ age distribution skewing older than the general population; older age  
15 groups tend to have lower education, and they also have lower incomes, but occupation is not a useful SEP  
16 measurement for retired individuals. Education was classified as, *No postsecondary education*: if the respondent  
17 did not complete any postsecondary education; *1-3 years postsecondary education*: for vocational education of 1 -  
18 3 years; *or for academy/professional graduates of 1 - 3 years*; *3+ postsecondary education*: for baccalaureate who  
19 completed 3 - 4 years, and *Academic* for those who completed graduate study of  $\geq 5$  years. Students were  
20 categorized at the level that their studies would end in, e.g. students in doctoral programs would be categorized  
21 as Academics even though they had not yet completed 5 years of graduate study.  
22  
23  
24  
25

26 Information on income was also extracted from the GESUS questionnaire, where it was reported in Danish Kroner  
27 (DDK). 100 DDK equals 13.42€, a fixed exchange rate for many years. Income was grouped into three equal  
28 groups: *Less than 300,000 DDK*; *300,000-599,999 DDK*; and *600,000+ DDK* and reported as:  $<40,250\text{€}$ ;  $\geq 40,250 <$   
29  $80,499\text{€}$ ; or  $\geq 80,500\text{€}$ .  
30  
31

32 When both income and education show the same association to an outcome, it will be addressed as an association  
33 to SEP; otherwise the association will be addressed to the variable in question (income/education).  
34  
35  
36  
37

### 38 ***Extrinsic variables***

39 Sociodemographic data included age, gender, marital status, and cohabitation status.  
40

41 Information on *somatic comorbidity* included: previous acute myocardial infarction (AMI), arteriosclerosis, angina  
42 pectoris, stroke, cancer, diabetes mellitus, hyper- or hypo-thyroidism. The somatic disorders were all grouped into  
43 one variable. Previous depressive episodes were registered separately.  
44  
45

46 *Present medication* covered self-reported use of antidepressants. Respondents defined as being in *present*  
47 *treatment* included both participants who reported use of antidepressants and participants identified in registers,  
48 as described below, who had redeemed a prescription for antidepressants and/or had contact with a psychiatrist  
49 and/or a psychologist within four months prior to the date of returning the questionnaire (in the following termed  
50 the *index date*) with the depression score.  
51  
52  
53

### 54 ***Dependent variables***

55 Data on dependable variables was drawn from national registers.  
56  
57  
58  
59  
60

1  
2  
3 The outcome variables were graded according to the stepwise treatment of increasing intensity for depression as  
4 was recommended in the Danish national guidelines at the time<sup>25</sup>. The guidelines start with #1) counselling and #  
5 2) therapy provided by the GP, followed by # 3) prescription of antidepressants, followed by # 4) referral to  
6 therapy with a psychologist, then # 5) referral to treatment by a psychiatrist, and finally referral to # 6) outpatient  
7 public psychiatrist or eventually #7) inpatient treatment at a psychiatric hospital (see code definitions in  
8 Supplement Table 1; an additional #0 refer to no treatment contact). Emergency visits to a mental hospital were  
9 included in the category of hospital contacts. The more severe or non-respondent the depression is to the  
10 proscribed treatment, the higher the patient is supposed to move in the recommended treatment hierarchy.  
11 Treatment by psychologists (#step 4) or psychiatrists (#steps 5 # and #6), whether private or public, were pooled  
12 into one group in some analyses due to low numbers of observations. Data on the utilization of private  
13 psychiatrists, psychologists, and general practitioners (GPs) was drawn from the Danish National Health Service  
14 Register for Primary Care<sup>34</sup>. For psychologists, only subsidized services are in the register. Respondents covered by  
15 private insurance and treated for depression or anxiety are included in the data, as insurance agencies require  
16 referral from GPs to compensate the patient.  
17  
18  
19  
20

21 Mental health counselling provided by a GP consists of at least two talks within the first six months and up to  
22 seven talks within one year. This type of therapeutic counselling is registered and paid as additional  
23 reimbursement to the GP. In the study, this service was termed mental health counselling by a GP (MHC by GP).  
24 Topics for ordinary consultations by GP are not registered in the national registers.  
25  
26

27 Data on prescriptions for antidepressants (Anatomical Therapeutic Chemical (ATC) classification system N06A)  
28 were extracted from the Danish National Prescription Registry<sup>35 36</sup>. However, bupropion (ATC N06AX12), which is  
29 approved for the treatment of depression in some countries, was excluded from this study since it is only  
30 prescribed for smoking cessation in Denmark.  
31  
32

33 Information concerning public in- and outpatient psychiatric treatment was drawn from the Danish National  
34 Patient Register<sup>37</sup> (ICD-10 coded F00 – F99).  
35  
36

### 37 **Statistical analyses**

38 First, we estimated the association between SEP and the different binary outcome variables (that is, the five  
39 different types of health care contact: *No health care contact*, *GP consultation*, *Mental health counselling by GP*,  
40 *Antidepressants*, and *Specialized mental health services*) in separate logistic regression models, both uni- and  
41 multivariable. Each model was stratified into three MDI categories: no/few symptoms (MDI < 21), symptoms of  
42 mild depression (MDI 21-25), and symptoms of moderate to severe depression (MDI ≥ 26). The SEP category '*No*  
43 *postsecondary education* and income <40,250€' was used as the reference category. To examine a possible  
44 interaction between SEP and MDI category, we employed logistic regression models for each outcome, with  
45 patients having *No postsecondary education / <40,250€* and *no/few depression symptoms* as key reference.  
46  
47  
48

49 Second, in order to evaluate differences in visits and prescription rates, we estimated incidence rate ratios (IRR) by  
50 Poisson regression models for each type of contact (*GP consultation*, *Mental health counselling by GP*,  
51 *Antidepressants*, and *Specialized mental health services*). For each type of contact, analyses were restricted to  
52 those patients who had at least one contact. For exposure, death and emigration within 180 days after index date  
53 were taken into consideration. As above, analyses were stratified into MDI category, and the SEP category '*No*  
54 *education* and < 40,250€' was used as a reference category.  
55  
56  
57  
58  
59  
60

1  
2  
3 Finally, we performed a linear regression analysis for the effect of combined SEP and MDI category on the highest  
4 reached treatment level (see treatment progression described above). The treatment levels were categorized as  
5 shown in Supplementary Table 1 (0: no treatment/contact; 1: GP consultation; 2: MHC by GP; 3: antidepressants;  
6 4: psychologist; 5: private psychiatrist; 6: public psychiatrist; 7: psychiatric hospital). Patients having *No*  
7 *postsecondary education* / < 40,250€ and *no/few depression symptoms* were the key reference groups.  
8  
9

10 All multivariable regression models included age (20-59 versus 60+), gender, present treatment with  
11 antidepressants, and psychologist or psychiatrist (*yes/no*), in addition to the variable studied in the univariate  
12 (crude) analysis. In analyses including income, cohabitation was also included.  
13  
14

15 The significance level was 5% throughout, and all reported confidence intervals were 95%. All statistical analyses  
16 were performed using Stata 14<sup>38</sup>.  
17  
18

### 19 **Patient and Public Involvement**

20 The study did not involve patients or public in planning or execution.  
21  
22

### 23 **Ethics**

24 Access to data from the GESUS was approved by the GESUS board in December 2015. The data were stored at a  
25 server at Statistics Denmark. The collection and handling of the data has been approved by the Danish Data  
26 Protection Agency, Journal number: 2015-41-3984. Approval by an ethics committee is not required for register  
27 studies in Denmark.  
28  
29  
30  
31  
32  
33  
34  
35  
36  
37  
38  
39  
40  
41  
42  
43  
44  
45  
46  
47  
48  
49  
50  
51  
52  
53  
54  
55  
56  
57  
58  
59  
60

## Results

The study included 19,011 respondents from the GESUS study; the original 21,253 were reduced by 1,627 respondents who entered before May 2010 due to data unavailability for 2009. The respondents were further reduced by an additional 615 who did not have a valid MDI score (see flowchart, Supplement Figure 1). 29 deaths and four persons emigrating were included in the analysis only until death or migration. In all, 988 (5.2%) had symptoms of depression. Of these, 441 had symptoms of mild depression and 547 had symptoms of moderate and severe depression, and of the latter group 271 were rated severe.

Respondents with no education beyond the secondary level were underrepresented by one-third when compared to the total sample population, according to Statistics Denmark; those with only 1-3 years of postsecondary education had a little higher representation, and the proportion with more than 3 years of postsecondary education had an almost 30 percent higher representation compared to the population in Næstved<sup>39</sup>.

| MDI score                                        | All<br>n (pct.) | MDI < 21<br>None/few | MDI 21 - 25<br>Mild | MDI 26+<br>Moder./sev§ | MDI missing<br>NA |
|--------------------------------------------------|-----------------|----------------------|---------------------|------------------------|-------------------|
| <b>Symptoms of depression</b>                    |                 |                      |                     |                        |                   |
| All                                              | 19626 (100)     | 18023 (100)          | 441 (100)           | 547 (100)              | 615 (100)         |
| <b>In treatment*</b>                             |                 |                      |                     |                        |                   |
| No                                               | 18076 (92.1)    | 16860 (93.5)         | 334 (75.7)          | 335 (61.2)             | 547 (88.9)        |
| Yes                                              | 1550 (7.9)      | 1163 (6.5)           | 107 (24.3)          | 212 (38.8)             | 68 (11.1)         |
| <b>Gender</b>                                    |                 |                      |                     |                        |                   |
| Male                                             | 8927 (45.5)     | 8349 (46.3)          | 162 (36.7)          | 168 (30.7)             |                   |
| Female                                           | 10699 (54.5)    | 9674 (53.7)          | 279 (63.3)          | 379 (69.3)             |                   |
| <b>Age group</b>                                 |                 |                      |                     |                        |                   |
| 20-29                                            | 294 (1.5)       | 266 (1.5)            | 10 (2.3)            | 17 (3.1)               |                   |
| 30-39                                            | 2382 (12.1)     | 2206 (12.2)          | 79 (17.9)           | 86 (15.7)              |                   |
| 40-49                                            | 4186 (21.3)     | 3891 (21.6)          | 106 (24)            | 146 (26.7)             |                   |
| 50-59                                            | 4417 (22.5)     | 4100 (22.7)          | 115 (26.1)          | 144 (26.3)             |                   |
| 60-69                                            | 5123 (26.1)     | 4771 (26.5)          | 74 (16.8)           | 93 (17)                |                   |
| 70+                                              | 3224 (16.4)     | 2789 (15.5)          | 57 (12.9)           | 61 (11.2)              |                   |
| <b>Marital status</b>                            |                 |                      |                     |                        |                   |
| Married                                          | 13398 (68.3)    | 12519 (69.5)         | 234 (53.1)          | 259 (47.3)             |                   |
| Separated/divorced                               | 2174 (11.1)     | 1936 (10.7)          | 71 (16.1)           | 117 (21.4)             |                   |
| Widow/er                                         | 1385 (7.1)      | 1172 (6.5)           | 37 (8.4)            | 45 (8.2)               |                   |
| None of the above                                | 2669 (13.6)     | 2396 (13.3)          | 99 (22.4)           | 126 (23)               |                   |
| <b>Cohabiting</b>                                |                 |                      |                     |                        |                   |
| No                                               | 4342 (22.1)     | 3745 (20.8)          | 147 (33.3)          | 217 (39.7)             |                   |
| Yes (incl missing)                               | 15284 (77.9)    | 14278 (79.2)         | 294 (66.7)          | 330 (60.3)             |                   |
| <b>Education</b>                                 |                 |                      |                     |                        |                   |
| None (No postsecondary)                          | 2988 (15.2)     | 2502 (13.9)          | 93 (21.1)           | 136 (24.9)             |                   |
| Vocational/1-3yrs (1-3 years postsecondary)      | 8227 (41.9)     | 7645 (42.4)          | 169 (38.3)          | 199 (36.4)             |                   |
| Academy/professional <3yrs (1-3 yrs postsecund.) | 2156 (11)       | 2005 (11.1)          | 56 (12.7)           | 58 (10.6)              |                   |
| Baccalaureate /3-4yrs (3+ years postsecondary)   | 5024 (25.6)     | 4706 (26.1)          | 104 (23.6)          | 137 (25)               |                   |
| Academic/5+yrs (3+ years postsecondary)          | 1231 (6.3)      | 1165 (6.5)           | 19 (4.3)            | 17 (3.1)               |                   |
| <b>Income</b>                                    |                 |                      |                     |                        |                   |
| less than 150,000DKK (< 40,250€)                 | 1063 (5.4)      | 847 (4.7)            | 38 (8.6)            | 69 (12.6)              |                   |
| 150,000 - 299,999DKK (<40,250€)                  | 3406 (17.4)     | 3003 (16.7)          | 100 (22.7)          | 139 (25.4)             |                   |
| 300,000 - 449,999 DDK (≥40,250 <80,500€)         | 3601 (18.3)     | 3344 (18.6)          | 73 (16.6)           | 98 (17.9)              |                   |
| 450,000 - 599,000DKK (≥40,250 <80,500€)          | 3025 (15.4)     | 2863 (15.9)          | 64 (14.5)           | 66 (12.1)              |                   |
| 600,000 - 749,999DKK (≥80,500€)                  | 3245 (16.5)     | 3086 (17.1)          | 74 (16.8)           | 64 (11.7)              |                   |
| 750,000 - 899,999DKK (≥80,500€)                  | 1856 (9.5)      | 1794 (10)            | 22 (5)              | 29 (5.3)               |                   |
| 900,000 - 1,049,999DKK (≥80,500€)                | 693 (3.5)       | 667 (3.7)            | 12 (2.7)            | 9 (1.6)                |                   |
| 1,050,000DKR + (≥80,500€)                        | 706 (3.6)       | 691 (3.8)            | 8 (1.8)             | 5 (.9)                 |                   |
| Missing                                          | 2031 (10.3)     | 1728 (9.6)           | 50 (11.3)           | 68 812.4)              |                   |
| <b>Comorb. former depression</b>                 |                 |                      |                     |                        |                   |
| No                                               | 16755 (85.4)    | 15826 (87.8)         | 255 (57.8)          | 210 (38.4)             |                   |
| Yes                                              | 2484 (12.7)     | 1917 (10.6)          | 173 (39.2)          | 319 (58.3)             |                   |
| Missing                                          | 387 (2)         | 280 (1.6)            | 13 (2.9)            | 18 (3.3)               |                   |
| <b>Comorbidity somatic, all ¶</b>                |                 |                      |                     |                        |                   |
| No                                               | 13791 (70.3)    | 13109 (72.7)         | 195 (44.2)          | 168 (30.7)             |                   |
| Yes                                              | 5835 (29.7)     | 4914 (27.3)          | 246 (55.8)          | 379 (69.3)             |                   |
| <b>Medication antidepressants #</b>              |                 |                      |                     |                        |                   |
| No                                               | 18537 (94.5)    | 17213 (95.5)         | 363 (82.3)          | 385 (70.4)             | 576 (93.7)        |
| Yes                                              | 1089 (5.5)      | 810 (4.5)            | 78 (17.7)           | 162 (29.6)             | 39 (6.3)          |

§ Moderate or severe  
\* In treatment at index date or 120 days before by psychologist, psychiatrist, or antidepressant prescription, according to GESUS or registers  
¶ Somatic comorbidities: Ischemic heart disease, diabetes, cancer, metabolic diseases  
# replied in questionnaire

1  
2 The baseline characteristics of the study sample are shown in table 1, in total, and stratified by severity of  
3 symptoms of depression. Respondents with symptoms of mild to severe depression tended to be: younger, more  
4 singles, living without a partner, and without formal education, compared to those with no/few symptoms.  
5  
6

7 Table 2 shows odds ratios for mental health care treatment contacts. Respondents in low SEP more often  
8 established contact with their GP than those in high SEP, whereas respondents in high SEP more often had no  
9 health care contacts at all; however, these differences disappeared in the group with symptoms of depression.  
10  
11

12 Among respondents with symptoms of depression, there was no statistically significant difference across  
13 educational groups or income groups in odds for contacts and prescriptions in the adjusted analyses, except those  
14 with 1-3 years of postsecondary education and mild symptoms had a lower use of mental health counselling by GP  
15 (adjusted odds ratio (aOR) 0.30, confidence interval (CI) 0.10 - 0.91) compared to respondents without any  
16 postsecondary education.  
17  
18

19 Among respondents with no/few symptoms, the group with three or more years of postsecondary education were  
20 30% more likely to have no healthcare contacts at all when compared to the group without postsecondary  
21 education (aOR 1.32, CI 1.18 - 1.49); likewise, respondents in the highest income group were 66% more likely to  
22 have no healthcare contacts at all when compared to the lowest income group (aOR 1.66, CI 1.46-1.89). Higher  
23 education (3+ years) as well as high income was associated with fewer consultations with a GP and fewer  
24 prescriptions of antidepressants, compared to those without postsecondary education or with low income.  
25 However, increased educational level was associated with more contact with specialized services (aOR 1.81, CI  
26 1.13 - 2.88; aOR 1.92, CI 1.18 - 3.13); however, this difference was not seen between the income groups.  
27  
28  
29  
30  
31  
32  
33  
34  
35  
36  
37  
38  
39  
40  
41  
42  
43  
44  
45  
46  
47  
48  
49  
50  
51  
52  
53  
54  
55  
56  
57  
58  
59  
60

**Table 2: Odds ratios for type of Mental health care treatment by educational- and income level stratified by MDI grade**

| Symptoms, depression                    | No/Few (MDI <21)           |                         | Mild (MDI 21-25)           |                         | Moderate/severe (MDI >25)  |                  |
|-----------------------------------------|----------------------------|-------------------------|----------------------------|-------------------------|----------------------------|------------------|
|                                         | Crude OR<br>(N=18023 pts.) | OR (adjusted)*          | Crude OR<br>(N = 441 pts.) | OR (adjusted)*          | Crude OR<br>(N = 547 pts.) | OR (adjusted)*   |
| <b>No contact at all</b>                |                            |                         |                            |                         |                            |                  |
| <b>Education</b>                        |                            |                         |                            |                         |                            |                  |
| No postsecondary educ.                  | Ref                        | Ref                     | Ref                        | Ref                     | Ref                        | Ref              |
| 1-3 years postsec. educ.                | <b>1.26 (1.13–1.40)</b>    | 1.10 (0.98–1.23)        | 1.96 (0.91–4.22)           | 1.62 (0.71–3.67)        | 1.73 (0.79–3.77)           | 1.62 (0.72–3.65) |
| 3+ years postsec. educ.                 | <b>1.54 (1.38–1.72)</b>    | <b>1.32 (1.18–1.49)</b> | <b>2.38 (1.05–5.38)</b>    | 2.01 (0.84–4.83)        | 1.99 (0.87–4.55)           | 1.79 (0.76–4.23) |
| <b>Income</b>                           | (N=16295)                  |                         | (N=391)                    |                         | (N=479)                    |                  |
| Income < 40,250€                        | Ref                        | Ref**                   | Ref                        | Ref**                   | Ref                        | Ref**            |
| Income ≥ 40,250 <80,500€                | <b>1.69 (1.53–1.87)</b>    | <b>1.39 (1.24–1.56)</b> | 1.20 (0.62–2.33)           | 0.79 (0.36–1.76)        | 1.74 (0.89–3.40)           | 1.59 (0.72–3.52) |
| Income ≥80,500€                         | <b>2.27 (2.06–2.51)</b>    | <b>1.66 (1.46–1.89)</b> | 1.90 (0.99–3.63)           | 1.35 (0.55–3.33)        | 1.16 (0.51–2.63)           | 1.04 (0.38–2.82) |
| <b>GP consultation</b>                  |                            |                         |                            |                         |                            |                  |
| No postsecondary educ.                  | Ref                        | Ref                     | Ref                        | Ref                     | Ref                        | Ref              |
| 1-3 years postsec. educ.                | 0.80 (0.72–0.89)           | 0.92 (0.82–1.02)        | 0.52 (0.26–1.06)           | 0.64 (0.31–1.35)        | 0.68 (0.35–1.31)           | 0.70 (0.36–1.37) |
| 3+ years postsec. educ.                 | 0.66 (0.59–0.74)           | <b>0.77 (0.68–0.86)</b> | <b>0.46 (0.21–0.97)</b>    | 0.54 (0.24–1.19)        | 0.69 (0.34–1.41)           | 0.74 (0.36–1.53) |
| <b>Income</b>                           |                            |                         |                            |                         |                            |                  |
| Income < 40,250€                        | Ref                        | Ref**                   | Ref                        | Ref**                   | Ref                        | Ref**            |
| Income ≥ 40,250 <80,500€                | <b>0.60 (0.54–0.66)</b>    | <b>0.72 (0.64–0.80)</b> | 0.90 (0.48–1.67)           | 1.25 (0.60–2.61)        | 0.55 (0.30–1.00)           | 0.53 (0.27–1.07) |
| Income ≥80,500€                         | <b>0.45 (0.41–0.50)</b>    | <b>0.60 (0.53–0.68)</b> | 0.63 (0.34–1.84)           | 0.79 (0.34–1.84)        | 0.94 (0.44–1.97)           | 0.81 (0.33–2.01) |
| <b>GP Mental health counseling</b>      |                            |                         |                            |                         |                            |                  |
| No postsecondary educ.                  | Ref                        | Ref                     | Ref                        | Ref                     | Ref                        | Ref              |
| 1-3 years postsec. educ.                | 1.20 (0.84–1.71)           | 1.09 (0.76–1.57)        | <b>0.34 (0.12–0.97)</b>    | <b>0.30 (0.10–0.91)</b> | 1.20 (0.61–2.33)           | 1.27 (0.65–2.50) |
| 3+ years postsec. educ.                 | 1.31 (0.90–1.89)           | 1.21 (0.83–1.76)        | 1.26 (0.50–3.17)           | 1.03 (0.38–2.81)        | 1.23 (0.59–2.55)           | 1.30 (0.62–2.73) |
| <b>Income</b>                           |                            |                         |                            |                         |                            |                  |
| Income < 40,250€                        | Ref                        | Ref**                   | Ref                        | Ref**                   | Ref                        | Ref**            |
| Income ≥ 40,250 <80,500€                | 1.07 (0.80–1.43)           | 1.09 (0.78–1.53)        | 1.14 (0.43–3.05)           | 1.40 (0.44–4.47)        | <b>2.06 (1.05–4.02)</b>    | 1.79 (0.81–3.97) |
| Income ≥80,500€                         | 0.84 (0.62–1.14)           | 0.85 (0.57–1.28)        | 1.20 (0.44–3.31)           | 1.33 (0.34–3.96)        | 1.66 (0.77–3.59)           | 1.35 (0.52–3.53) |
| <b>Antidepressants</b>                  |                            |                         |                            |                         |                            |                  |
| No postsecondary educ.                  | Ref                        | Ref                     | Ref                        | Ref                     | Ref                        | Ref              |
| 1-3 years postsec. educ.                | 0.85 (0.71–1.01)           | 0.75 (0.55–1.01)        | 0.96 (0.52–1.77)           | 1.11 (0.47–2.65)        | 0.72 (0.47–1.10)           | 0.82 (0.43–1.56) |
| 3+ years postsec. educ.                 | <b>0.69 (0.57–0.83)</b>    | <b>0.69 (0.50–0.95)</b> | 1.17 (0.60–2.29)           | 1.40 (0.54–3.63)        | 0.65 (0.40–1.05)           | 0.86 (0.42–1.77) |
| <b>Income</b>                           |                            |                         |                            |                         |                            |                  |
| Income < 40,250€                        | Ref                        | Ref**                   | Ref                        | Ref**                   | Ref                        | Ref**            |
| Income ≥ 40,250 <80,500€                | <b>0.67 (0.57–0.78)</b>    | <b>0.71 (0.52–0.95)</b> | 0.77 (0.43–1.39)           | 1.29 (0.51–3.25)        | 0.67 (0.43–1.03)           | 0.53 (0.25–1.11) |
| Income ≥80,500€                         | <b>0.44 (0.37–0.52)</b>    | <b>0.56 (0.39–0.80)</b> | 0.63 (0.33–1.20)           | 1.25 (0.39–3.96)        | <b>0.53 (0.32–0.89)</b>    | 0.53 (0.20–1.36) |
| <b>Specialized services<sup>‡</sup></b> |                            |                         |                            |                         |                            |                  |
| No postsecondary educ.                  | Ref                        | Ref                     | Ref                        | Ref                     | Ref                        | Ref              |
| 1-3 years postsec. educ.                | <b>1.94 (1.24–3.03)</b>    | <b>1.81 (1.13–2.88)</b> | 1.34 (0.52–3.46)           | 0.79 (0.27–2.36)        | 1.30 (0.70–2.43)           | 1.73 (0.87–3.41) |
| 3+ years postsec. educ.                 | <b>1.91 (1.20–3.05)</b>    | <b>1.92 (1.18–3.13)</b> | 2.01 (0.75–5.41)           | 1.41 (0.45–4.36)        | 1.25 (0.63–2.49)           | 1.67 (0.78–3.57) |
| <b>Income</b>                           |                            |                         |                            |                         |                            |                  |
| Income < 40,250€                        | Ref                        | Ref**                   | Ref                        | Ref**                   | Ref                        | Ref**            |
| Income ≥ 40,250 <80,500€                | 1.03 (0.75–1.42)           | 1.11 (0.76–1.64)        | 0.67 (0.30–1.49)           | 0.79 (0.36–1.76)        | 1.32 (0.73–2.37)           | 1.47 (0.69–3.14) |
| Income ≥80,500€                         | 0.89 (0.64–1.23)           | 0.99 (0.63–1.55)        | 0.96 (0.44–2.09)           | 1.35 (0.55–3.33)        | 1.05 (0.53–2.11)           | 1.36 (0.52–3.56) |

\* Adjusted for age- group 60 +/-, gender, present treatment of antidepressants, psychologist or psychiatrist  
\*\* Adjusted for age-group 60 +/-, gender, present treatment of antidepressants, psychologist or psychiatrist, cohabitation  
<sup>‡</sup> Psychologist or psychiatrist public or private  
Results significant within a 95% confidence interval are marked in bold



**Table 3 Incidence rate ratios for *Mental health care treatments* by education- and income level stratified by MDI grade**

| Symptoms of depression             | No/few (MDI <21)        |                         | Mild (MDI 21-25)        |                         | Moderate/severe (MDI >25) |                         |
|------------------------------------|-------------------------|-------------------------|-------------------------|-------------------------|---------------------------|-------------------------|
|                                    | IRR (crude)             | IRR (Adjusted)*         | IRR (crude)             | IRR (Adjusted)*         | IRR (crude)               | IRR (Adjusted)*         |
| <b>GP consultation</b>             | (N=18023)               |                         | (N=441)                 |                         | (N=547)                   |                         |
| <b>Education</b>                   | Ref                     | Ref                     | Ref                     | Ref                     | Ref                       | Ref                     |
| No postsecondary educ.             |                         |                         |                         |                         |                           |                         |
| 1-3 years postsec. educ.           | <b>0.82 (0.80–0.84)</b> | <b>0.87 (0.85–0.89)</b> | <b>0.79 (0.69–0.89)</b> | <b>0.88 (0.77–0.99)</b> | <b>0.81 (0.73–0.89)</b>   | <b>0.81 (0.74–0.89)</b> |
| 3+ years postsec. educ.            | <b>0.77 (0.75–0.80)</b> | <b>0.84 (0.81–0.86)</b> | <b>0.74 (0.64–0.86)</b> | <b>0.83 (0.72–0.97)</b> | <b>0.76 (0.68–0.85)</b>   | <b>0.77 (0.69–0.86)</b> |
| <b>Income</b>                      | (N=16295)               |                         | (N=391)                 |                         | (N=479)                   |                         |
| Income < 40,250€                   | Ref                     | Ref**                   | Ref                     | Ref**                   | Ref                       | Ref**                   |
| Income ≥40,250 <80,500€            | <b>0.81 (0.80-0.83)</b> | <b>0.88 (0.85-0.90)</b> | <b>0.75 (0.66–0.85)</b> | 0.88 (0.76–1.02)        | <b>0.74 (0.67-0.82)</b>   | <b>0.81 (0.72-0.91)</b> |
| Income ≥80,500€                    | <b>0.67 (0.66-0.69)</b> | <b>0.78 (0.76-0.81)</b> | <b>0.63 (0.55–0.73)</b> | <b>0.78 (0.65–0.94)</b> | <b>0.66 (0.59-0.75)</b>   | <b>0.75 (0.65-0.86)</b> |
| <b>GP Mental health counseling</b> |                         |                         |                         |                         |                           |                         |
| No postsecondary educ.             | Ref                     | Ref                     | Ref                     | Ref                     | Ref                       | Ref                     |
| 1-3 years postsec. educ.           | 0.93 (0.73–1.20)        | 0.93 (0.72–1.20)        | 1.36 (0.70–2.64)        | 1.22 (0.58–2.56)        | 1.08 (0.74–1.58)          | 1.13 (0.77–1.65)        |
| 3+ years postsec. educ.            | 0.93 (0.72–1.22)        | 0.93 (0.71–1.21)        | 0.85 (0.44–1.61)        | 0.82 (0.40–1.69)        | 0.76 (0.48–1.18)          | 0.79 (0.50–1.24)        |
| Income < 40,250€                   | Ref                     | Ref                     | Ref                     | Ref                     | Ref                       | Ref                     |
| Income ≥40,250 <80,500€            | 0.98 (0.79–1.22)        | 0.93 (0.74–1.18)        | 0.73 (0.39–1.36)        | 0.97 (0.49–1.91)        | 0.83 (0.56–1.23)          | 0.69 (0.42–1.14)        |
| Income ≥80,500€                    | 1.00 (0.80–1.25)        | 0.94 (0.71–1.24)        | <b>0.45 (0.22–0.96)</b> | <b>0.39 (0.18–0.88)</b> | 1.07 (0.69–1.64)          | 0.86 (0.50–1.48)        |
| <b>Antidepressants#</b>            |                         |                         |                         |                         |                           |                         |
| No postsecondary educ.             | Ref                     | Ref                     | Ref                     | Ref                     | Ref                       | Ref                     |
| 1-3 years postsec. educ.           | 0.95 (0.85–1.05)        | 0.93 (0.84–1.03)        | 1.03 (0.73–1.46)        | 1.05 (0.73–1.50)        | 1.07 (0.89–1.28)          | 1.06 (0.88–1.27)        |
| 3+ years postsec. educ.            | 1.00 (0.89–1.12)        | 1.01 (0.90–1.13)        | 1.10 (0.76–1.59)        | 1.11 (0.77–1.62)        | 1.12 (0.91–1.37)          | 1.08 (0.88–1.33)        |
| Income < 40,250€                   | Ref                     | Ref**                   | Ref                     | Ref**                   | Ref                       | Ref**                   |
| Income ≥40,250 <80,500€            | 0.98 (0.90–1.08)        | 1.00 (0.90–1.11)        | 1.09 (0.79–1.49)        | 1.29 (0.90–1.84)        | 0.97 (0.80–1.18)          | 0.92 (0.73–1.16)        |
| Income ≥80,500€                    | 0.92 (0.83–1.02)        | 0.95 (0.84–1.09)        | 1.02 (0.71–1.46)        | 1.18 (0.74–1.88)        | 1.18 (0.94–1.47)          | 1.11 (0.84–1.46)        |
| <b>Specialized services#</b>       |                         |                         |                         |                         |                           |                         |
| No postsecondary educ.             | Ref                     | Ref                     | Ref                     | Ref                     | Ref                       | Ref                     |
| 1-3 years postsec. educ.           | 0.97 (0.77–1.22)        | 0.94 (0.75–1.19)        | 1.11 (0.71–1.71)        | 0.93 (0.58–1.48)        | 0.93 (0.72–1.21)          | 0.94 (0.72–1.22)        |
| 3+ years postsec. educ.            | 1.06 (0.84–1.34)        | 1.02 (0.80–1.29)        | 1.32 (0.85–2.05)        | 1.02 (0.63–1.66)        | 1.09 (0.82–1.43)          | 1.10 (0.83–1.46)        |
| Income < 40,250€                   | Ref                     | Ref**                   | Ref                     | Ref**                   | Ref                       | Ref**                   |
| Income ≥40,250 <80,500€            | 1.09 (0.92–1.28)        | 1.20 (0.99–1.45)        | 1.30 (0.91–1.85)        | 1.30 (0.88–1.94)        | 1.01 (0.78–1.30)          | 0.77 (0.57–1.06)        |
| Income ≥80,500€                    | 1.18 (1.00–1.39)        | <b>1.35 (1.09–1.68)</b> | <b>1.58 (1.14–2.19)</b> | 1.21 (0.79–1.86)        | 1.46 (1.12–1.92)          | 1.00 (0.69–1.45)        |

\* Adjusted for age-group 60 +/-, gender, present treatment of antidepressants, psychologist or psychiatrist  
 \*\* Adjusted for age-group 60 +/-, gender, present treatment of antidepressants, psychologist or psychiatrist, cohabitation  
 # Psychologist or psychiatrist, public or private  
 # Number reimbursed prescriptions  
 Results significant within a 95% confidence interval are marked in bold

Table 3 shows that the rate (incidence rate ratios (IRR)) of visits to a GP were higher for the group with no postsecondary education compared to the others, independent of depression score. For all other outcomes, there were no significant differences between educational groups in visit rates when adjusted for age, gender, and present treatment among those using services. SEP measured by income showed the same results, except participants with mild symptoms of depression and high income had a lower visit rate for GP-MHC than the low-income group (aIRR 0.39, CI 0.18-0.88). Additionally, among participants with no/few symptoms of depression, high income was associated with more frequent visits to a specialist, compared to the low income group (aIRR 1.35, CI 1.09-1.68).

Table 4 shows the highest gained treatment level within the 180 day window in crude numbers. (Supplementary table 2 shows Number and mean number of mental health care treatment by MDI grade). More severe symptoms were met with a higher level of treatment, though 10% of the respondents with symptoms of moderate to severe depression had no contact at all. 47% of the 547 with symptoms of moderate to severe depression had no treatment or contacts beyond a GP consultation.

**Table 4. Highest gained treatment level by MDI grade**

| Final treatment level\MDI grade | No/few       | Mild       | Mod./severe |
|---------------------------------|--------------|------------|-------------|
| No contacts                     | 4540 (25.2)  | 73 (16.6)  | 56 (10.2)   |
| GP consultation                 | 12084 (67)   | 257 (58.3) | 259 (47.3)  |
| GP MHC                          | 160 (.9)     | 5 (1.1)    | 20 (3.7)    |
| Antidepressants#                | 931 (5.2)    | 64 (14.5)  | 125 (22.9)  |
| Psychologists                   | 162 (.9)     | 17 (3.9)   | 27 (4.9)    |
| Priv psychiatrist               | 96 (.5)      | 18 (4.1)   | 39 (7.1)    |
| Out-pat. Psychiatry             | 17 (.1)      | 3 (.7)     | 7 (1.3)     |
| Admission MH & EA **            | 33 (.2)      | 4 (.9)     | 14 (2.6)    |
| Sum                             | 18.023 (100) | 441 (100)  | 547 (100)   |

Percent's in brackets

# Reimbursed prescriptions

\* Contact to either psychologist or psychiatrist, public or private

\*\* MH: Mental hospital; EA: Emergency access psychiatric ward

Table 5 shows that respondents with symptoms of depression gained a significantly higher treatment level, increasing with higher symptom score, compared to those with no/few symptoms and no postsecondary education or low income (Supplementary table 3 shows highest treatment level gained within six months by education, income and severity of symptoms, in crude numbers and percentage). For the group with no/few symptoms, respondents with 3+ years of postsecondary education or higher income reached a lower level overall. We found no statistically significant differences between educational groups stratified by grade of symptoms, but a significant increase in treatment level within each educational group when depression score increased from no/few symptoms to symptoms of mild depression, and again when it changed to symptoms of moderate/severe depression (results not shown). SEP measured by income had similar outcomes, but differed in the group with mild symptoms of depression, where only respondents with high income gained a higher treatment level compared to the low income group with no/few symptoms.



**Table 5. Mean level of Mental health care treatment by educational and income level and MDI grade**

| No/few symptoms of depression                                                                                        |               | $\beta^*$                   |
|----------------------------------------------------------------------------------------------------------------------|---------------|-----------------------------|
| <b>Education</b>                                                                                                     | .97 (N=19011) |                             |
| No postsecondary education                                                                                           | 0.98 (N=2502) | (Ref)                       |
| 1-3 years postsecondary education                                                                                    | 0.94 (N=9650) | <b>-0.06 (-0.09; -0.03)</b> |
| 3+ years postsecondary education                                                                                     | 0.87 (N=5871) | <b>-0.05 (-0.08; -0.02)</b> |
| <b>Income</b>                                                                                                        | .96 (N=17165) |                             |
| Income < 40,250€                                                                                                     | 1.07 (N=3850) | (Ref)**                     |
| Income ≥40,250 <80,500€                                                                                              | 0.93 (N=6207) | -0.01 (-0.04; 0.02)         |
| Income ≥80,500€                                                                                                      | 0.81 (N=6238) | <b>-0.12 (-0.15; -0.09)</b> |
| <b>Mild symptoms of depression</b>                                                                                   |               |                             |
| No postsecondary education                                                                                           | 1.49 (N=93)   | <b>0.15 (0.01; 0.29)</b>    |
| 1-3 years postsecondary education                                                                                    | 1.47 (N=225)  | <b>0.14 (0.05; 0.24)</b>    |
| 3+ years postsecondary education                                                                                     | 1.58 (N=123)  | <b>0.22 (0.10; 0.35)</b>    |
| Income < 40,250€                                                                                                     | 1.62 (N=138)  | 0.05 (-0.06; 0.17)          |
| Income ≥40,250 <80,500€                                                                                              | 1.46 (N=137)  | 0.11 (-0.01; 0.23)          |
| Income ≥80,500€                                                                                                      | 1.47 (N=116)  | <b>0.22 (0.09; 0.34)</b>    |
| <b>Moderate/severe symptoms of depression</b>                                                                        |               |                             |
| No postsecondary education                                                                                           | 2.18 (N=136)  | <b>0.37 (0.26; 0.49)</b>    |
| 1-3 years postsecondary education                                                                                    | 1.99 (N=257)  | <b>0.35 (0.26; 0.44)</b>    |
| 3+ years postsecondary education                                                                                     | 2.01 (N=154)  | <b>0.45 (0.33; 0.56)</b>    |
| Income < 40,250€                                                                                                     | 2.10 (N=208)  | <b>0.28 (0.18; 0.37)</b>    |
| Income ≥40,250 <80,500€                                                                                              | 2.06 (N=164)  | <b>0.40 (0.29; 0.51)</b>    |
| Income ≥80,500€                                                                                                      | 1.80 (N=107)  | <b>0.34 (0.21; 0.47)</b>    |
| * Adjusted for age 60 +/-, gender, present treatment of antidepressants, psychologist or psychiatrist                |               |                             |
| ** Adjusted for age 60 +/-, gender, present treatment of antidepressants, psychologist or psychiatrist, cohabitation |               |                             |
| Treatment levels: 0; no contact; 1: GP consultation; 2: GP MHC; 3: Antidepressants; 4: psychologist;                 |               |                             |
| 5: priv. psychiatrist; 6: publ. psychiatrist; 7: psychiatric hospital & emergency visits                             |               |                             |

## Discussion

Participants with symptoms of depression were treated according to the severity of the symptoms, independent of SEP; however, more than half with moderate to severe symptoms received no treatment beyond GP consultation. People in low SEP and with no/few symptoms of depression were more often treated with antidepressants.

### *Symptoms of depression & use of services*

Respondents in need and in contact with health care providers were treated according to their needs. This finding aligns with other studies on treatment of depression<sup>40</sup> that likewise found SEP had no independent impact on the type of treatment<sup>17 41 42</sup> or intensity of treatment<sup>37;43</sup>. Yet some studies have found that higher education was associated with more use of specialized mental health care, even when adjusted for needs<sup>44-46</sup>. All these prior studies rely on recalled service use only, however, and thus may be subject to recall bias.

### *Symptoms of depression & no use*

1  
2  
3 A Swedish follow-up study of more than 2,000 respondents with symptoms of depression (MDI>20) or anxiety  
4 likewise found that one-third did not seek care at all. People with a higher education were less likely to seek care  
5 at all, and if they did, they more often sought help from a psychologist<sup>47</sup>. Other studies report that 35-52% of  
6 respondents with symptoms of severe common mental disorders have no treatment contacts<sup>36,48</sup>. As in the  
7 Swedish study, we found respondents with 3+ years of postsecondary education or high income were less likely to  
8 have contacts at all, compared to respondents without postsecondary education or low income, but these  
9 differences were not significant in the groups with symptoms of depression.

10  
11  
12 GPs' ability to detect depression could be questioned, since only half the respondents with moderate to severe  
13 symptoms of depression are treated. When compared to ratings determined through semi-structured interviews,  
14 the detection rates for depression in primary health care are relatively low, with a sensitivity rate of 50% and a  
15 specificity rate of 81%<sup>49</sup> in 2009, and more recently in 2014, a sensitivity rate of 51% and a specificity rate of 87%,  
16 when compared to a standardised instrument as the Patient Health Questionnaire-9<sup>50</sup>. The use of depression  
17 scoring tools validated for primary care could improve detection rates; if self-administered, it would be less time-  
18 consuming for GPs and perhaps a more realistic approach<sup>49</sup>. It is noteworthy that the proportion receiving the  
19 highest treatment level from a GP was the same across educational groups.

20  
21  
22  
23 A German study on trends in non-help-seeking for mental disorders found a downward trend, finding that 57% of  
24 the citizens with present symptoms of a mental disorder had never sought help for a mental problem in the years  
25 2009-2012<sup>51</sup>; this result is very similar to the findings of our study.

### 26 27 28 29 30 *No/few symptoms of depression & use of services*

31 The group that was treated, but scored with no/few symptoms of depression, may indicate emerging needs or an  
32 overuse of services. Since respondents did not each undergo additional screening by a professional, there is a lack  
33 of verification for the level of need beyond the self-reported symptoms on the inventory. However, we consider a  
34 comparison across socioeconomic groups relevant in this group, as in the other symptoms groups.

35  
36  
37 Firstly, we found no/few symptoms of depression was associated with more use of specialized mental health  
38 services for respondents with postsecondary education when compared to those with no postsecondary  
39 education, adjusting for age, gender, and present treatment. Notably, when income was used as an indicator of  
40 SEP, no difference in use of specialist services was found. Other researchers have found higher education is  
41 associated with more use of specialized services and suggest it could be due to the fact that higher-educated  
42 individuals might recognize and accept psychiatric needs more than lower-educated individuals<sup>44</sup>; or that mental  
43 health treatment makes heavy demands on a client's cognitive capacities and this presents a greater obstacle for  
44 people with less education<sup>45</sup>. What is seen in the group with no/few symptoms could be the treatment of  
45 emerging mental health problems, and a result of specialized services being requested more by patients with  
46 postsecondary education, or that specialized services are a more evident first choice by the GP for some patients.  
47 We had also expected the expenses associated with the use of psychologists in Denmark<sup>52</sup> would have an impact,  
48 but it did not.

49  
50  
51  
52  
53  
54 An Australian study found that only a small proportion (4%) of individuals without any disorders or need indicators  
55 were among those receiving mental health care. Though this group comprised a fair proportion of service users,  
56 the vast majority only sought brief primary care or counselling treatment rather than consultations with  
57 psychiatrists, where they constituted only 7% of psychiatry patients<sup>53</sup>. That study did not relate the use of services

1  
2 to SEP. However, a Canadian study did find that individuals using mental health care and having no symptoms of  
3 mental disorders were better educated compared to those with mental disorders using the services<sup>16</sup>.

4  
5  
6 Secondly, we found that prescription of antidepressants was more common in the group with no/few symptoms  
7 and in low SEP. Similar findings were shown in another Australian study, where low SEP was associated with  
8 higher prescription rates not attributable to higher rates of depression<sup>54</sup>. The most plausible reason for this  
9 association is that depressive disorders are more prevalent in this group and antidepressants are the first choice of  
10 treatment, or that antidepressants are more commonly used as analgesic medications in this group, as chronic  
11 pain is more common for persons with low SEP<sup>55</sup>.

### 12 13 14 *Strengths and limitations*

15  
16 A major strength of this study was that we were able to obtain reliable data on need from a large sample of  
17 people in the GESUS as well as high-quality data on healthcare contacts and prescriptions of antidepressants from  
18 national registers, addressing challenges common in studies of equality in health care<sup>9</sup>. To our knowledge, this is  
19 the first study combining survey data of depression scores with register data on mental health care treatment.  
20 Thus we managed to avoid the inherent problem of recall bias, which is a common problem in these types of  
21 studies<sup>56</sup>.

22  
23  
24  
25 SEP may be defined in different several ways<sup>33</sup>, but in the present study we used education and income as  
26 indicators of SEP. The span of respondents seen in the sample, from a few students to a high proportion of older  
27 and retired persons, indicated that income and employment status would be less potent to differentiate the  
28 resources that respondents could be expected to have. For that reason, education was the first choice, paired with  
29 income, even though older age is associated with lower educational attainment<sup>27</sup>. Additionally, education seems a  
30 particularly important factor when evaluating the use of health care specialists<sup>10</sup>.

31  
32  
33  
34 The study related respondents' use of services based on an indication of need (MDI score) that might not capture  
35 the fluctuations in all six months afterwards, which is a potential limitation. Even though need will change over  
36 time, such change would not be expected to differ among the socioeconomic groups; however, if it did, it would  
37 be expected to trend towards higher need for those in low SEP.

38  
39  
40 The actual reasons for treatment contacts were not known, nor were the reasons for prescriptions of  
41 antidepressants known; both could have been for disorders other than depression, indicating a potential  
42 limitation of the study design. The variety of other possible disorders would tend to be more common for people  
43 in low SEP, and may explain the generally higher use of GP by respondents in low SEP.

44  
45  
46 Another potential limitation is that not all services used are included in the registers. If a patient is not referred by  
47 a GP and pays the full expense for a treatment out of pocket, there is no state reimbursement and subsequently  
48 no registration of the treatment in the registers. This would usually indicate high-income individuals, which is  
49 often associated with more years of postsecondary education. We do not expect this to be a common scenario,  
50 though we have no data to support this.

### 51 52 53 *Implications*

54 For clinicians and policy makers it is of particular interest to know that the treatment of patients with symptoms of  
55 depression matched the severity of symptoms and was independent of the SEP of the patient.

1  
2  
3 A high proportion with symptoms of depression was not treated. Initiatives to improve mental health literacy  
4 might help people with symptoms of depression to address mental health problems when consulting their GP and  
5 thereby increase treatment rates. Better attention to mental health by the GP is also necessary, and probably a  
6 more systematic approach in evaluating patients' mental health should be implemented.  
7

8  
9 An interesting disparity between education and income on use of specialized services was found in the group with  
10 no/few symptoms. Are specialized services – most likely psychologists – the first choice for the GP when the  
11 patient has more years of postsecondary education? Is the initial treatment of patients with depressive symptoms  
12 different depending on their education, and why are the prescription rates of antidepressants much higher for  
13 persons in low SEP compared to those in high SEP? These issues deserve in-depth exploration in order to more  
14 fully address issues of health inequity.  
15  
16

### 17 18 19 **Conclusion**

20 We found no differentiation between socioeconomic groups in the treatment of respondents with symptoms of  
21 moderate to severe depression when looking at treatment contact, frequency of contacts, or level of treatment.  
22 However, more than half the respondents with moderate to severe symptoms had no treatment beyond GP  
23 consultation. Respondents with no/few symptoms of depression used services differently; people with low SEP  
24 were more often treated with antidepressants than people with high SEP, whereas people with postsecondary  
25 education were more likely to receive specialist services compared to those without postsecondary education,  
26 though this association was not found for income.  
27  
28  
29  
30  
31  
32  
33  
34  
35

### 36 37 **Author contributions**

38 The statistical analyses were performed by statistician SW. AP conceived the research and wrote the first draft of  
39 the manuscript assisted by FBW. FBW contributed substantially to the study design and choice of analysis. AH, ES,  
40 and LH contributed to the data analysis, interpretation of results and critical revision of the manuscript.  
41

### 42 43 **Acknowledgement**

44 With acknowledgment to Mogens Vestergaard professor Department of Public Health, Aarhus University,  
45 Denmark for comments and contributions in the initial stage of the study. We thank GESUS for sharing data, the  
46 Health Research Foundation of Region Zealand for financial support, and former head nurse Tove Kjærbo for  
47 initiating the study.  
48

49 Data sharing: no additional data available.  
50  
51  
52  
53  
54  
55  
56  
57  
58  
59  
60

1. OECD. Health policies and data: Health Inequalities 2017 [updated 6/11/2017. Available from: <http://www.oecd.org/els/health-systems/inequalities-in-health.htm>.
2. World Health Organization. Health 2020. A European policy framework and strategy for the 21st century. Copenhagen, 2013:1-184.
3. Lynch JW, Kaplan GA, Shema SJ. Cumulative impact of sustained economic hardship on physical, cognitive, psychological, and social functioning. *N Engl J Med* 1997;337(26):1889-95. doi: 10.1056/NEJM199712253372606 [doi]
4. Ahnquist J, Wamala SP. Economic hardships in adulthood and mental health in Sweden. The Swedish National Public Health Survey 2009. *BMC Public Health* 2011;11:788. doi: 10.1186/1471-2458-11-788 [published Online First: 2011/10/13]
5. Lorant V, Deliege D, Eaton W, et al. Socioeconomic inequalities in depression: a meta-analysis. *Am J Epidemiol* 2003;157(2):98-112.
6. Lorant V, Croux C, Weich S, et al. Depression and socio-economic risk factors: 7-year longitudinal population study. *Br J Psychiatry* 2007;190:293-8.:293-98.
7. World Health Organization. Depression and Other Common Mental Disorders: Global Health Estimates. Geneva, 2017:1-24.
8. Laursen TM, Musliner KL, Benros ME, et al. Mortality and life expectancy in persons with severe unipolar depression. *J Affect Disord* 2016;193:203-7. doi: 10.1016/j.jad.2015.12.067. Epub;2016 Jan 6.:203-07.
9. Goddard M, Smith P. Equity of access to health care services: theory and evidence from the UK. *Soc Sci Med* 2001;53(9):1149-62.
10. Fjaer EL, Balaj M, Stornes P, et al. Exploring the differences in general practitioner and health care specialist utilization according to education, occupation, income and social networks across Europe: findings from the European social survey (2014) special module on the social determinants of health. *Eur J Public Health* 2017;27(suppl\_1):73-81.
11. Hanratty B, Zhang T, Whitehead M. How close have universal health systems come to achieving equity in use of curative services? A systematic review. *Int J Health Serv* 2007;37(1):89-109.
12. ten Have M, Iedema J, Ormel J, et al. Explaining service use for mental health problems in the Dutch general population: the role of resources, emotional disorder and functional impairment
246. *Soc Psychiatry Psychiatr Epidemiol* 2006;41(4):285-93.
13. Andrews G, Issakidis C, Carter G. Shortfall in mental health service utilisation. *Br J Psychiatry* 2001;179:417-25.:417-25.
14. Kohn R, Saxena S, Levav I, et al. The treatment gap in mental health care. *Bull World Health Organ* 2004;82(11):858-66.
15. Lin E, Goering P, Offord DR, et al. The use of mental health services in Ontario: epidemiologic findings. *Can J Psychiatry* 1996;41(9):572-77.
16. Fleury MJ, Ngui AN, Bamvita JM, et al. Predictors of healthcare service utilization for mental health reasons. *Int J Environ Res Public Health* 2014;11(10):10559-86.
17. Glozier N, Davenport T, Hickie IB. Identification and management of depression in Australian primary care and access to specialist mental health care. *Psychiatr Serv* 2012;63(12):1247-51. doi: 1392910 [pii];10.1176/appi.ps.201200017 [doi]
18. Boerema AM, Ten Have M, Kleiboer A, et al. Demographic and need factors of early, delayed and no mental health care use in major depression: a prospective study. *BMC psychiatry* 2017;17(1):367. doi: 10.1186/s12888-017-1531-8 [published Online First: 2017/11/18]

19. Hansen AH, Høye A. Gender differences in the use of psychiatric outpatient specialist services in Tromsø, Norway are dependent on age: a population-based cross-sectional survey. *BMC Health Serv Res* 2015;15: doi:10.1186/s12913-015-1146-z:doi-1146.
20. Dezetter A, Duhoux A, Menear M, et al. Reasons and Determinants for Perceiving Unmet Needs for Mental Health in Primary Care in Quebec. *Can J Psychiatry* 2015;60(6):284-93.
21. Evans-Lacko S, Aguilar-Gaxiola S, Al-Hamzawi A, et al. Socio-economic variations in the mental health treatment gap for people with anxiety, mood, and substance use disorders: results from the WHO World Mental Health (WMH) surveys. *Psychol Med* 2017;1-12. doi: 10.1017/s0033291717003336 [published Online First: 2017/11/28]
22. Packness A, Waldorff FB, Christensen RD, et al. Impact of socioeconomic position and distance on mental health care utilization: a nationwide Danish follow-up study. *Soc Psychiatry Psychiatr Epidemiol* 2017;10-1437.
23. Pedersen KM, Andersen JS, Sondergaard J. General practice and primary health care in Denmark. *J Am Board Fam Med* 2012;25 Suppl 1:S34-8. doi: 10.3122/jabfm.2012.02.110216.:S34-S38.
24. Larsen A. Psykologbehandling: [www.sundhed.dk](http://www.sundhed.dk); 2014 [updated 9/29/2014. Available from: [www.sundhed.dk/borger/sygdomme-a-aa/sociale-ydelser/sociale-ydelser/behandling/psykologbehandling/](http://www.sundhed.dk/borger/sygdomme-a-aa/sociale-ydelser/sociale-ydelser/behandling/psykologbehandling/).
25. Bergholdt HK, Bathum L, Kvetny J, et al. Study design, participation and characteristics of the Danish General Suburban Population Study. *Dan Med J* 2013;60(9):A4693. doi: A4693 [pii]
26. Økonomi- og Indenrigsministeriet. [Equalizing between municipalities and general subsidizes 2014] Kommunal udligning og generelle tilskud 2014. In: Indenrigsministeriet Ø-o, ed. København, 2013:1-246.
27. Pedersen CB. The Danish Civil Registration System. *Scand J Public Health* 2011;39(7 Suppl):22-25.
28. Olsen LR, Jensen DV, Noerholm V, et al. The internal and external validity of the Major Depression Inventory in measuring severity of depressive states. *Psychol Med* 2003;33(2):351-56.
29. World Health Organization. The ICD-10 Classification of Mental and Behavioural Disorders 1989.
30. Bech P, Timmerby N, Martiny K, et al. Psychometric evaluation of the Major Depression Inventory (MDI) as depression severity scale using the LEAD (Longitudinal Expert Assessment of All Data) as index of validity. *BMC Psychiatry* 2015;15:190. doi: 10.1186/s12888-015-0529-3.:190-0529.
31. Sundhedsstyrelsen. [Referenceprogram for treatment of unipolar depression in adults]. In: (SfR) SfR, ed. Copenhagen, 2007:1-138.
32. Bech P. Clinical Psychometrics. First ed. Oxford: John Wiley & Sons, Ltd. 2012:153-53.
33. Galobardes B, Shaw M, Lawlor DA, et al. Indicators of socioeconomic position (part 1). *J Epidemiol Community Health* 2006;60(1):7-12. doi: 10.1136/jech.2004.023531 [doi]
34. Andersen JS, Olivarius NF, Krasnik A. The Danish National Health Service Register. *Scand J Public Health* 2011;39(7 Suppl):34-37.
35. Kildemoes HW, Sorensen HT, Hallas J. The Danish National Prescription Registry. *Scand J Public Health* 2011;39(7 Suppl):38-41.
36. World Health Organization CCfDSM. Guidelines for ATC classification and DDD assignment 2014. 17 ed. Oslo: Norwegian Institute of Public Health 2013:1-273.
37. Lynge E, Sandegaard JL, Rebolj M. The Danish National Patient Register. *Scand J Public Health* 2011;39(7 Suppl):30-33.
38. Stata Statistical Software: Release 14. [program]. 1 version: College Station,TX:StataCorp LP., 2015.
39. Statistics Denmark. StatBank Denmark [Public Database]. Statistics Denmark; [Available from: [www.statistikbanken.dk](http://www.statistikbanken.dk) accessed 11/11 2015.
40. McCracken C, Dalgard OS, Ayuso-Mateos JL, et al. Health service use by adults with depression: Community survey in five European countries - Evidence from the ODIN study. *British Journal of Psychiatry* 2006;189(AUG.):August. doi: <http://dx.doi.org/10.1192/bjp.bp.105.015081>
41. Gabilondo A, Rojas-Farreras S, Rodriguez A, et al. Use of primary and specialized mental health care for a major depressive episode in Spain by ESEMeD respondents. *Psychiatr Serv* 2011;62(2):152-61.



42. Dey M, Jorm AF. Social determinants of mental health service utilization in Switzerland. *Int J Public Health* 2017;62(1):85-93.
43. ten Have M, Nuyen J, Beekman A, et al. Common mental disorder severity and its association with treatment contact and treatment intensity for mental health problems. *Psychol Med* 2013:1-11.
44. Hansen AH, Halvorsen PA, Ringberg U, et al. Socio-economic inequalities in health care utilisation in Norway: a population based cross-sectional survey. *BMC Health Serv Res* 2012;12:336. doi: 10.1186/1472-6963-12-336.:336-12.
45. ten Have M, Oldehinkel A, Vollebergh W, et al. Does educational background explain inequalities in care service use for mental health problems in the Dutch general population? *Acta Psychiatr Scand* 2003;107:178-87.
46. Vasiliadis HM, Tempier R, Lesage A, et al. General practice and mental health care: determinants of outpatient service use. *Can J Psychiatry* 2009;54(7):468-76.
47. Wallerblad A, Moller J, Forsell Y. Care-Seeking Pattern among Persons with Depression and Anxiety: A Population-Based Study in Sweden. *Int J Family Med* 2012;2012:895425. doi: 10.1155/2012/895425. Epub;2012 May 10.:895425.
48. Perkins D, Fuller J, Kelly BJ, et al. Factors associated with reported service use for mental health problems by residents of rural and remote communities: cross-sectional findings from a baseline survey. *BMC Health Serv Res* 2013;13:157. doi: 10.1186/1472-6963-13-157.:157-13.
49. Mitchell AJ, Vaze A, Rao S. Clinical diagnosis of depression in primary care: a meta-analysis. *Lancet* 2009;374(9690):609-19.
50. Carey M, Jones K, Meadows G, et al. Accuracy of general practitioner unassisted detection of depression. *Aust N Z J Psychiatry* 2014;48(6):571-78.
51. Brandstetter S, Dodoo-Schittko F, Speerforck S, et al. Trends in non-help-seeking for mental disorders in Germany between 1997-1999 and 2009-2012: a repeated cross-sectional study. *Soc Psychiatry Psychiatr Epidemiol* 2017:10-1384.
52. Kiil A, Houlberg K. How does copayment for health care services affect demand, health and redistribution? A systematic review of the empirical evidence from 1990 to 2011. *Eur J Health Econ* 2014;15(8):813-28.
53. Bobevski I, Rosen A, Meadows G. Mental health service use and need for care of Australians without diagnoses of mental disorders: findings from a large epidemiological survey. *Epidemiol Psychiatr Sci* 2017;%19:1-11. doi: 10.1017/S2045796017000300.:1-11.
54. Butterworth P, Olesen SC, Leach LS. Socioeconomic differences in antidepressant use in the PATH Through Life Study: evidence of health inequalities, prescribing bias, or an effective social safety net? *J Affect Disord* 2013;149(1-3):75-83.
55. Riskowski JL. Associations of socioeconomic position and pain prevalence in the United States: findings from the National Health and Nutrition Examination Survey. *Pain medicine (Malden, Mass)* 2014;15(9):1508-21. doi: 10.1111/pme.12528 [published Online First: 2014/08/21]
56. Brusco NK, Watts JJ. Empirical evidence of recall bias for primary health care visits. *BMC Health Serv Res* 2015;15:381. doi: 10.1186/s12913-015-1039-1.:381-1039.

Socioeconomic position, symptoms of depression and subsequent mental health care treatment: a Danish register-based six-month follow-up study on a population survey.

**Supplementary figure and tables**

Figure 1

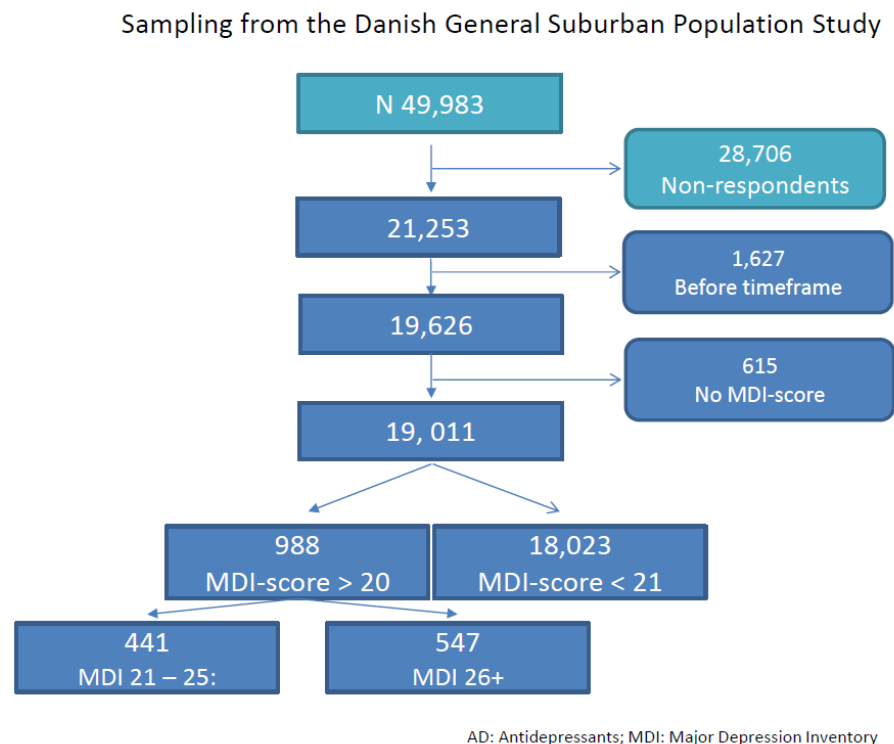

Supplement Table 1. Definition of treatment levels

| Level | Primary health care | Additional health care             | Defined by source and code                             |
|-------|---------------------|------------------------------------|--------------------------------------------------------|
| 0     | No contact          |                                    | Not in NPR, NHR, NPrR                                  |
| 1     | GP                  | Consultation                       | + NHR GP (800101 + 800120 +(800411 – 800491) + 804001) |
| 2     | GP                  | Mental health counselling by GP    | + NHR GP & contact concerning mental health (806101)   |
| 3     | GP                  | Antidepressants                    | + NPrR by ATC: NO6A – excluding N06AX12                |
| 4     | GP                  | Private psychologist               | +NHR (630110 – 630211) + (630214 – 630340)             |
| 5     | GP                  | Private psychiatrist               | +NHR (240110 – 240140) + (240210 – 240236) + 241401    |
| 6     | GP                  | Out-patient psychiatry             | +NPR by ICD-10: F 00– F99.99                           |
| 7     | GP                  | Mental hospital & Emergency visits | +NPR by ICD-10: F 00– F99.99                           |

NPR: The National Patient Register; NHR: The National Health Service Register; NPrR: The National Prescription Registry; ATC: Anatomical Therapeutic Chemical classification.



Socioeconomic position, symptoms of depression and subsequent mental health care treatment:  
a Danish register-based six-month follow-up study on a population survey.

**Supplement Table 2. Number and mean number of Mental health care treatments by MDI grade**

| Symptoms of depression          | No/few       | Mild       | Moderate/severe | Total        |
|---------------------------------|--------------|------------|-----------------|--------------|
| Persons n (Pct.)                | 18023 (100)  | 441 (100)  | 547 (100)       | 19011 (100)  |
| <b>No contact</b>               |              |            |                 |              |
| Persons n (Pct.)                | 4540 (25.2)  | 73 (16.6)  | 56 (10.2)       | 4669 (24.6)  |
| <b>GP consultation</b>          |              |            |                 |              |
| Persons n (Pct.)                | 13329 (74.0) | 356 (80.7) | 474 (86.7)      | 14159 (74.5) |
| Visits n                        | 45044        | 1433       | 2252            | 48729        |
| Visit rates $\bar{x}$           | 3.38         | 4.03       | 4.75            | 3.44         |
| <b>GP MHC</b>                   |              |            |                 |              |
| Persons n (Pct.)                | 329 (1.8)    | 28 (6.3)   | 64 (11.7)       | 421 (2.2)    |
| Visits n                        | 611          | 57         | 168             | 836          |
| Visit rates $\bar{x}$           | 1.86         | 2.04       | 2.63            | 1.99         |
| <b>Antidepressants#</b>         |              |            |                 |              |
| Persons n (Pct.)                | 1056 (5.9)   | 87 (29.7)  | 186 (34.0)      | 1329 (7.0)   |
| Prescriptions n                 | 2769         | 227        | 670             | 3666         |
| Prescrip rates $\bar{x}$        | 2.62         | 2.61       | 3.60            | 2.76         |
| <b>Psychologists</b>            |              |            |                 |              |
| Persons n (Pct.)                | 167 (0.9)    | 19 (4.3)   | 31 (5.7)        | 217 (1.1)    |
| Visits n                        | 706          | 112        | 144             | 962          |
| Visit rates $\bar{x}$           | 4.23         | 5.89       | 4.65            | 4.43         |
| <b>Private psychiatrist</b>     |              |            |                 |              |
| Persons n (Pct.)                | 100 (0.6)    | 20 (4.5)   | 42 (7.7)        | 162 (0.9)    |
| Visits n                        | 274          | 57         | 201             | 532          |
| Visit rates $\bar{x}$           | 2.74         | 2.85       | 4.79            | 3.28         |
| <b>Out-patient Psychiatry</b>   |              |            |                 |              |
| Persons n (Pct.)                | 22 (0.1)     | 4 (0.9)    | 9 (1.6)         | 35 (0.2)     |
| Visits n                        | 103          | 34         | 46              | 183          |
| Visit rates $\bar{x}$           | 4.68         | 8.50       | 5.11            | 5.23         |
| <b>Specialized services*</b>    |              |            |                 |              |
| Persons n (Pct.)                | 283 (1.6)    | 40 (9.1)   | 76 (13.9)       | 399 (2.1)    |
| Visits n                        | 1083         | 203        | 391             | 1677         |
| Visit rates $\bar{x}$           | 3.83         | 5.07       | 5.14            | 4.20         |
| <b>Admission MH &amp; EA **</b> |              |            |                 |              |
| Persons n (Pct.)                | 33 (0.2)     | 4 (0.9)    | 14 (2.6)        | 51 (0.3)     |
| Visits n                        | 49           | 11         | 37              | 97           |
| Visit rates $\bar{x}$           | 1.48         | 2.75       | 2.64            | 1.90         |

$\bar{x}$  Mean number of visits by respondents using the service/prescriptions

# Reimbursed prescriptions

\* Contact to either psychologist or psychiatrist, public or private

\*\* MH: Mental hospital; EA: Emergency access psychiatric ward

Supplement Table 3. Highest treatment level gained within six months by education, income, and severity of symptoms, in crude numbers and percentage

| Crude                             |      |      |     |      |     |     |     |     |      | Crude                           |             |      |    |     |    |    |   |    |      |     |       |
|-----------------------------------|------|------|-----|------|-----|-----|-----|-----|------|---------------------------------|-------------|------|----|-----|----|----|---|----|------|-----|-------|
| Highest gained treatment level*   |      |      |     |      |     |     |     |     |      | Highest gained treatment level* |             |      |    |     |    |    |   |    |      |     |       |
| No postsec education              | 0    | 1    | 2   | 3    | 4   | 5   | 6   | 7   |      | Income < 40,250€                | 0           | 1    | 2  | 3   | 4  | 5  | 6 | 7  |      |     |       |
| MDI < 21                          | 512  | 1783 | 17  | 162  | 5   | 11  | 6   | 6   | 2502 | MDI < 21                        | 649         | 2809 | 28 | 292 | 26 | 27 | 7 | 12 | 3850 |     |       |
| MDI 21 - 25                       | 9    | 62   | 2   | 13   | 3   | 3   | 0   | 1   | 93   | MDI 21 - 25                     | 19          | 80   | 2  | 20  | 9  | 6  | 1 | 1  | 138  |     |       |
| MDI >25                           | 9    | 63   | 5   | 39   | 3   | 11  | 2   | 4   | 136  | MDI >25                         | 17          | 99   | 4  | 58  | 7  | 16 | 1 | 6  | 208  |     |       |
| Missing                           | 15   | 208  | 2   | 27   | 2   | 0   | 1   | 2   | 257  | Missing                         | 33          | 204  | 3  | 26  | 2  | 3  | 1 | 1  | 273  |     |       |
| 1-3 years postsecondary education |      |      |     |      |     |     |     |     |      | Income ≥ 40,250 <80,500€        |             |      |    |     |    |    |   |    |      |     |       |
| MDI < 21                          | 2361 | 6512 | 84  | 515  | 93  | 54  | 10  | 21  | 9650 | MDI < 21                        | 1586        | 4113 | 74 | 318 | 62 | 34 | 6 | 14 | 6207 |     |       |
| MDI 21 - 25                       | 39   | 134  | 1   | 31   | 6   | 9   | 3   | 2   | 225  | MDI 21 - 25                     | 22          | 83   | 1  | 19  | 4  | 7  | 0 | 1  | 137  |     |       |
| MDI >25                           | 28   | 122  | 8   | 59   | 14  | 20  | 2   | 4   | 257  | MDI >25                         | 22          | 73   | 7  | 32  | 8  | 13 | 5 | 4  | 164  |     |       |
| Missing                           | 42   | 177  | 5   | 22   | 2   | 3   | 0   | 0   | 251  | Missing                         | 20          | 81   | 2  | 13  | 1  | 1  | 0 | 0  | 118  |     |       |
| 3+ years postsecondary education  |      |      |     |      |     |     |     |     |      | Income ≥80,500€                 |             |      |    |     |    |    |   |    |      |     |       |
| MDI < 21                          | 1667 | 3789 | 59  | 254  | 64  | 31  | 1   | 6   | 5871 | MDI < 21                        | 1969        | 3923 | 44 | 209 | 63 | 26 | 0 | 4  | 6238 |     |       |
| MDI 21 - 25                       | 25   | 61   | 2   | 20   | 8   | 6   | 0   | 1   | 123  | MDI 21 - 25                     | 27          | 62   | 2  | 12  | 4  | 5  | 2 | 2  | 116  |     |       |
| MDI >25                           | 19   | 74   | 7   | 27   | 10  | 8   | 3   | 6   | 154  | MDI >25                         | 10          | 61   | 5  | 15  | 7  | 7  | 0 | 2  | 107  |     |       |
| Missing                           | 25   | 68   | 0   | 12   | 1   | 1   | 0   | 0   | 107  | Missing                         | 13          | 24   | 0  | 1   | 1  | 0  | 0 | 0  | 39   |     |       |
| Pct                               |      |      |     |      |     |     |     |     |      | Spec#                           | Pct         |      |    |     |    |    |   |    |      |     | Spec# |
| No postsec education              | 0    | 1    | 2   | 3    | 4   | 5   | 6   | 7   |      | Income < 40,250€                | 0           | 1    | 2  | 3   | 4  | 5  | 6 | 7  |      |     |       |
| MDI < 21                          | 20   | 71   | 0,7 | 6,5  | 0,2 | 0,4 | 0,2 | 0,2 | 0,9  | MDI < 21                        | 17          | 73   | 1  | 8   | 1  | 1  | 0 | 0  | 100  | 1,6 |       |
| MDI 21 - 25                       | 10   | 67   | 2,2 | 14,0 | 3,2 | 3,2 | 0,0 | 1,1 | 100  | 6,5                             | MDI 21 - 25 | 14   | 58 | 1   | 14 | 7  | 4 | 1  | 1    | 100 | 11,6  |
| MDI >25                           | 7    | 46   | 3,7 | 28,7 | 2,2 | 8,1 | 1,5 | 2,9 | 100  | 11,8                            | MDI >25     | 8    | 48 | 2   | 28 | 3  | 8 | 0  | 3    | 100 | 11,5  |
| 1-3 years postsecondary education |      |      |     |      |     |     |     |     |      | Income ≥ 40,250 <80,500€        |             |      |    |     |    |    |   |    |      |     |       |
| MDI < 21                          | 24   | 67   | 0,9 | 5,3  | 1,0 | 0,6 | 0,1 | 0,2 | 100  | 1,6                             | MDI < 21    | 26   | 66 | 1   | 5  | 1  | 1 | 0  | 0    | 100 | 1,6   |
| MDI 21 - 25                       | 17   | 60   | 0,4 | 13,8 | 2,7 | 4,0 | 1,3 | 0,9 | 100  | 8,0                             | MDI 21 - 25 | 16   | 61 | 1   | 14 | 3  | 5 | 0  | 1    | 100 | 8,0   |
| MDI >25                           | 11   | 47   | 3,1 | 23,0 | 5,4 | 7,8 | 0,8 | 1,6 | 100  | 14,0                            | MDI >25     | 13   | 45 | 4   | 20 | 5  | 8 | 3  | 2    | 100 | 15,9  |
| 3+ years postsecondary education  |      |      |     |      |     |     |     |     |      | Income ≥80,500€                 |             |      |    |     |    |    |   |    |      |     |       |
| MDI < 21                          | 28   | 65   | 1,0 | 4,3  | 1,1 | 0,5 | 0,0 | 0,1 | 100  | 1,6                             | MDI < 21    | 32   | 63 | 1   | 3  | 1  | 0 | 0  | 0    | 100 | 1,4   |
| MDI 21 - 25                       | 20   | 50   | 1,6 | 16,3 | 6,5 | 4,9 | 0,0 | 0,8 | 100  | 11,4                            | MDI 21 - 25 | 23   | 53 | 2   | 10 | 3  | 4 | 2  | 2    | 100 | 9,5   |
| MDI >25                           | 12   | 48   | 4,5 | 17,5 | 6,5 | 5,2 | 1,9 | 3,9 | 100  | 13,6                            | MDI >25     | 9    | 57 | 5   | 14 | 7  | 7 | 0  | 2    | 100 | 13,1  |

Treatment level: 0: none; 1: GP (general practitioner); 2: GP-mental health consultations; 3: antidepressants; 4: psychologist; 5: private psychiatrist; 6: public psychiatrist; 7: mental hospital

#Spec: Specialized services includes 4+5+6

1  
2  
3  
4  
5  
6  
7  
8  
9  
10  
11  
12  
13  
14  
15  
16  
17  
18  
19  
20  
21  
22  
23  
24  
25  
26  
27  
28  
29  
30  
31  
32  
33  
34  
35  
36  
37  
38  
39  
40  
41  
42  
43  
44  
45  
46  
47

For peer review only

STROBE Statement for the study: **Socioeconomic position, symptoms of depression, and subsequent health care utilization and treatment: a Danish register-based six-month follow-up on a survey study.**

|                              | Item No | Recommendation                                                                                                                                                                                    | Addressed on page:     |
|------------------------------|---------|---------------------------------------------------------------------------------------------------------------------------------------------------------------------------------------------------|------------------------|
| <b>Title and abstract</b>    | 1       | (a) Indicate the study's design with a commonly used term in the title or the abstract                                                                                                            | 1                      |
|                              |         | (b) Provide in the abstract an informative and balanced summary of what was done and what was found                                                                                               | 2                      |
| <b>Introduction</b>          |         |                                                                                                                                                                                                   |                        |
| Background/rationale         | 2       | Explain the scientific background and rationale for the investigation being reported                                                                                                              | 3                      |
| Objectives                   | 3       | State specific objectives, including any prespecified hypotheses                                                                                                                                  | 3                      |
| <b>Methods</b>               |         |                                                                                                                                                                                                   |                        |
| Study design                 | 4       | Present key elements of study design early in the paper                                                                                                                                           | 3                      |
| Setting                      | 5       | Describe the setting, locations, and relevant dates, including periods of recruitment, exposure, follow-up, and data collection                                                                   | 4                      |
| Participants                 | 6       | (a) Give the eligibility criteria, and the sources and methods of selection of participants. Describe methods of follow-up                                                                        | 4 - 5                  |
|                              |         | (b) For matched studies, give matching criteria and number of exposed and unexposed                                                                                                               |                        |
| Variables                    | 7       | Clearly define all outcomes, exposures, predictors, potential confounders, and effect modifiers. Give diagnostic criteria, if applicable                                                          | 4 - 5<br>Table 1       |
| Data sources/<br>measurement | 8*      | For each variable of interest, give sources of data and details of methods of assessment (measurement). Describe comparability of assessment methods if there is more than one group              | 4 - 5<br>Table 1       |
| Bias                         | 9       | Describe any efforts to address potential sources of bias                                                                                                                                         |                        |
| Study size                   | 10      | Explain how the study size was arrived at                                                                                                                                                         | 4 + 8 &<br>Suppl Fig 1 |
| Quantitative variables       | 11      | Explain how quantitative variables were handled in the analyses. If applicable, describe which groupings were chosen and why                                                                      | 4 - 6                  |
| Statistical methods          | 12      | (a) Describe all statistical methods, including those used to control for confounding                                                                                                             | 6 - 7                  |
|                              |         | (b) Describe any methods used to examine subgroups and interactions                                                                                                                               |                        |
|                              |         | (c) Explain how missing data were addressed                                                                                                                                                       | 7                      |
|                              |         | (d) If applicable, explain how loss to follow-up was addressed                                                                                                                                    | 4                      |
|                              |         | (e) Describe any sensitivity analyses                                                                                                                                                             |                        |
| <b>Results</b>               |         |                                                                                                                                                                                                   |                        |
| Participants                 | 13*     | (a) Report numbers of individuals at each stage of study—eg numbers potentially eligible, examined for eligibility, confirmed eligible, included in the study, completing follow-up, and analysed | 8<br>Suppl fig 1       |
|                              |         | (b) Give reasons for non-participation at each stage                                                                                                                                              | Figure 1               |
|                              |         | (c) Consider use of a flow diagram                                                                                                                                                                | Figure 1               |
| Descriptive data             | 14*     | (a) Give characteristics of study participants (eg demographic, clinical, social) and information on exposures and potential confounders                                                          | Table 1                |
|                              |         | (b) Indicate number of participants with missing data for each variable of interest                                                                                                               | Table 1                |
|                              |         | (c) Summarise follow-up time (eg, average and total amount)                                                                                                                                       |                        |

|    |                          |     |                                                                                  |                            |
|----|--------------------------|-----|----------------------------------------------------------------------------------|----------------------------|
| 1  | Outcome data             | 15* | Report numbers of outcome events or summary measures over time                   |                            |
| 2  | Main results             | 16  | (a) Give unadjusted estimates and, if applicable, confounder-adjusted            | Table 4<br>Supp tab<br>2+3 |
| 3  |                          |     | estimates and their precision (eg, 95% confidence interval). Make clear          |                            |
| 4  |                          |     | which confounders were adjusted for and why they were included                   |                            |
| 5  |                          |     | (b) Report category boundaries when continuous variables were categorized        | 4                          |
| 6  |                          |     | (c) If relevant, consider translating estimates of relative risk into absolute   |                            |
| 7  |                          |     | risk for a meaningful time period                                                |                            |
| 8  | Other analyses           | 17  | Report other analyses done—eg analyses of subgroups and interactions, and        | 7                          |
| 9  |                          |     | sensitivity analyses                                                             |                            |
| 10 | <b>Discussion</b>        |     |                                                                                  |                            |
| 11 | Key results              | 18  | Summarise key results with reference to study objectives                         | 13                         |
| 12 | Limitations              | 19  | Discuss limitations of the study, taking into account sources of potential       | 15                         |
| 13 |                          |     | bias or imprecision. Discuss both direction and magnitude of any potential       |                            |
| 14 |                          |     | bias                                                                             |                            |
| 15 | Interpretation           | 20  | Give a cautious overall interpretation of results considering objectives,        | 13 - 16                    |
| 16 |                          |     | limitations, multiplicity of analyses, results from similar studies, and other   |                            |
| 17 |                          |     | relevant evidence                                                                |                            |
| 18 | Generalisability         | 21  | Discuss the generalisability (external validity) of the study results            | 15-16                      |
| 19 | <b>Other information</b> |     |                                                                                  |                            |
| 20 | Funding                  | 22  | Give the source of funding and the role of the funders for the present study     | 1                          |
| 21 |                          |     | and, if applicable, for the original study on which the present article is based |                            |

\*Give information separately for exposed and unexposed groups.

**Note:** An Explanation and Elaboration article discusses each checklist item and gives methodological background and published examples of transparent reporting. The STROBE checklist is best used in conjunction with this article (freely available on the Web sites of PLoS Medicine at <http://www.plosmedicine.org/>, Annals of Internal Medicine at <http://www.annals.org/>, and Epidemiology at <http://www.epidem.com/>). Information on the STROBE Initiative is available at <http://www.strobe-statement.org>.

# BMJ Open

## Socioeconomic position, symptoms of depression, and subsequent mental health care treatment: a Danish register-based six-month follow-up study on a population survey.

|                                 |                                                                                                                                                                                                                                                                                                                                                                                                                                                                                                                                                                                                                                                 |
|---------------------------------|-------------------------------------------------------------------------------------------------------------------------------------------------------------------------------------------------------------------------------------------------------------------------------------------------------------------------------------------------------------------------------------------------------------------------------------------------------------------------------------------------------------------------------------------------------------------------------------------------------------------------------------------------|
| Journal:                        | <i>BMJ Open</i>                                                                                                                                                                                                                                                                                                                                                                                                                                                                                                                                                                                                                                 |
| Manuscript ID                   | bmjopen-2017-020945.R2                                                                                                                                                                                                                                                                                                                                                                                                                                                                                                                                                                                                                          |
| Article Type:                   | Research                                                                                                                                                                                                                                                                                                                                                                                                                                                                                                                                                                                                                                        |
| Date Submitted by the Author:   | 13-Jun-2018                                                                                                                                                                                                                                                                                                                                                                                                                                                                                                                                                                                                                                     |
| Complete List of Authors:       | Packness, Aake; Syddansk Universitet Det Sundhedsvidenskabelige Fakultet, Public Health; Psykiatrien i Region Sjælland, Psychiatric Research Unit<br>Halling, Anders; Linnaeus Universitetet Institutionen for sprak, Department of Medicine and Optometry<br>Hastrup, Lene; Psykiatrien i Region Sjælland, Psychiatric Research Unit<br>Simonsen, Erik; Psykiatrien i Region Sjælland, Psychiatric Research Unit<br>Wehberg, Sonja; Syddansk Universitet Institut for Sundhedstjenesteforskning, Department of Public Health<br>Waldorff, Frans; University of Southern Denmark, Research Unit for General Practice, Health Science Department |
| <b>Primary Subject Heading</b>: | Health services research                                                                                                                                                                                                                                                                                                                                                                                                                                                                                                                                                                                                                        |
| Secondary Subject Heading:      | Mental health, General practice / Family practice, Health policy, Public health, Epidemiology                                                                                                                                                                                                                                                                                                                                                                                                                                                                                                                                                   |
| Keywords:                       | Depression & mood disorders < PSYCHIATRY, Common Mental Disorders, Access, PUBLIC HEALTH, PRIMARY CARE, Equity                                                                                                                                                                                                                                                                                                                                                                                                                                                                                                                                  |
|                                 |                                                                                                                                                                                                                                                                                                                                                                                                                                                                                                                                                                                                                                                 |

SCHOLARONE™  
Manuscripts

1  
2  
3  
4  
5 **Socioeconomic position, symptoms of depression, and subsequent mental health care treatment: a Danish**  
6 **register-based six-month follow-up study on a population survey.**  
7

8 A Packness, A Halling, LH Hastrup, E Simonsen, S Wehberg, FB Waldorff  
9

10  
11 Department of Public Health, University of Southern Denmark, DK-5000 Odense, Denmark. Aake Packness, MPH,  
12 Research Unit for General Practice, University of Southern Denmark. Anders Halling, professor, Department of  
13 Medicine and Optometry, Faculty of Health and Life Sciences, Linnaeus University, SE-391 85 Kalmar, Sweden.  
14 Lene H Hastrup, senior researcher, Psychiatric Research Unit, Region of Zealand, DK-4200 Slagelse, Denmark. Erik  
15 Simonsen, professor, Department of Clinical Medicine, University of Copenhagen, Psychiatric Research Unit,  
16 Region of Zealand, Denmark. Sonja Wehberg, statistician, Department of Public Health and Research Unit of  
17 Clinical Epidemiology, Institute of Clinical Research, University of Southern Denmark, DK-5000 Odense, Denmark.  
18 Frans B Waldorff, professor, Department of Public Health, University of Southern Denmark, DK-5000 Odense,  
19 Denmark.  
20

21  
22 Correspondence to: A Packness [apackness@health.sdu.dk](mailto:apackness@health.sdu.dk)  
23 ORCID-0000-0002-4695-6214  
24

25 Research Unit of General Practice, Institute of Public Health, J.B. Winsløws Vej 9A, DK-5000 Odense C, Denmark.  
26 Telephone: +45 20537264  
27

28  
29  
30 Word count: 4,870  
31

32  
33 The Corresponding Author has the right to grant on behalf of all authors and does grant on behalf of all authors an  
34 exclusive licence on a worldwide basis to the BMJ Publishing Group Ltd to permit this article (if accepted) to be  
35 published in BMJ editions and any other BMJGL products and sub-licences such use and exploit all subsidiary  
36 rights, as set out in our licence.  
37

38 All authors have completed the Unified Competing Interest form (available on request from the corresponding  
39 author) and declare: no support from any organisation for the submitted, no financial relationships with any  
40 organisations that might have an interest in the submitted work in the previous three years, and no other  
41 relationships or activities that could appear to have influenced the submitted work.  
42

43  
44 Funding: The study has been supported by an unrestricted grant (No 15-000342) from the Health Research  
45 Foundation of Region Zealand.  
46

47 **Transparency declaration**

48 Aake Packness affirms that this manuscript is an honest, accurate, and transparent account of the study being  
49 reported, that no important aspects of the study have been omitted, and that any discrepancies from the study as  
50 planned have been explained.  
51  
52  
53  
54  
55  
56  
57  
58  
59  
60

## Abstract

**Objective:** Examine whether the severity of symptoms of depression were associated with the type of mental health care treatment (MHCT) received, independent of socioeconomic position (SEP).

**Design:** Register-based six-month follow-up study on participants from the Danish General Suburban Population Study (GESUS) 2010-2013, who scored the Major Depression Inventory (MDI).

**Participants:** 19,011 respondents from GESUS.

**Interventions:** MHCT of the participants was tracked in national registers four months prior and six months after their MDI score. MHCT was graduated in levels. SEP was defined by years of formal postsecondary education and income categorised in three levels. Data was analysed using logistic and Poisson regression analyses.

**Outcomes:** MHCT included number of contacts to: general practitioner (GP), GP mental health counselling, psychologist, psychiatrist, emergency contacts, admissions to mental hospital, and prescriptions of antidepressants.

**Results:** For 547 respondents with moderate to severe symptoms of depression there was no difference across SEP in use of services, contact (y/n), frequency of contact, or level of treatment, except respondents with low SEP had more frequent contact with their GP. However, of the 547, 10% had no treatment contacts at all, and 47% had no treatment beyond GP consultation. Among respondents with no/few symptoms of depression, postsecondary education  $\geq 3$  years was associated with more contact with specialized services (adjusted odds ratio aOR 1.92; 95% confidence interval (CI) 1.18-3.13); however, this difference did not apply for income; additionally, high SEP was associated with fewer prescriptions of antidepressants (education aOR 0.69; CI 0.50-0.95; income aOR 0.56, CI 0.39-0.80) compared to low SEP.

**Conclusion:** Participants with symptoms of depression were treated according to the severity of their symptoms, independent of SEP; however, more than half with moderate to severe symptoms received no treatment beyond GP consultation. People with low SEP and no/few symptoms of depression were more often treated with antidepressants.

The study was approved by The Danish Data Protection Agency Journal number 2015-41-3984.

Accessible at: <https://www.datatilsynet.dk/fortegnelsen/soeg-i-fortegnelsen/>

### Strengths and limitations of this study

- The design of this study, combining data from a population survey on depression symptom-scores with prospective register data on health care use and medication, is unique in health service research on treatment of people with symptoms of depression.
- The study design made it possible to reduce the inherent problem of recall bias in these types of studies.
- The actual reasons for treatment contacts or for prescription of antidepressants were not known, they could have been caused by other disorders than depression.
- The study sample was generally better educated than the population they were sampled from



## Title:

**Socioeconomic position, symptoms of depression, and subsequent mental health care treatment: a Danish register-based six-month follow-up study on a population survey.**

## Introduction

Equal access to health care based on need and the reduction of health inequalities are major policy objectives in most OECD countries<sup>1</sup>. Similarly, the World Health Organization states that addressing social inequalities contributes significantly to health and well-being of individuals and countries<sup>2</sup>.

Sustained economic hardship can lead to poorer physical, psychological, and cognitive functioning<sup>3</sup>, and is furthermore associated with a higher prevalence of mental health problems<sup>4</sup>. Specifically, depressive disorders are more prevalent among people with a low socioeconomic position (SEP)<sup>5</sup> and enhanced by worsening socioeconomic circumstances<sup>6</sup>. Whereas low SEP is an outcome of schizophrenia low SEP is a determinant for depression<sup>7,8</sup>. Additionally, depression is a major health problem, globally ranked as the single largest contributor to non-fatal health loss, accounting for 7.5% overall in years lived with disability<sup>9</sup>. It is estimated that life expectancy is reduced by 14 years for men and 10 years for women treated for severe depression<sup>10</sup>.

Equity in access to health care is commonly defined as equal access for equal need. However, both *access* and *need* are ambiguous concepts<sup>11</sup>. It has been documented that patients with a high SEP use more specialized health care services<sup>12,13</sup>, also within mental health care<sup>14</sup>; yet there remains a gap between those in need of mental health care and those who receive it<sup>15-17</sup>. Additionally, not all users of mental health care are in clinical need<sup>18</sup>. As for depression and anxiety disorders, some studies have found access to specialist care to be reflective of clinical need, with little inequity in SEP<sup>19,20</sup>, whereas others report specialized mental health services are not provided to persons with low SEP according to need<sup>21,22</sup>, or that higher SEP is associated with more use of specialized mental health services<sup>23,24</sup>. This uncertainty and the fact that depressive disorders are widespread and more common among persons with lower SEP makes these disorders both relevant and well suited to evaluate the capability of health care systems to address the needs of economically deprived citizens. Depression is a serious disorder with extensive personal, social and economic consequences, which makes its treatment an important issue and health equality an urgent cause.

## Objectives

We aimed to evaluate whether the Danish health care system delivers equal treatment to patients with symptoms of depression. We defined *mental health care treatment* (MCHT) as the use of specific health care services related to the treatment of depressive disorders, as well as treatment with antidepressants.

The objective was to examine if the severity of symptoms of depression (need) was associated with the mental health care treatment received, independent of SEP in both type and frequency of treatments, and highest gained treatment level within six months following a symptom score in a survey study.

## Method

### *Design*

A six-month follow-up study on respondents with symptoms of depression, combining survey data with register data on mental health care treatment.

### **Setting: Danish health care system**

1  
2  
3 Health care is tax-funded in Denmark and free at delivery, except for dental care and visits to psychologists for  
4 adults, which are both partly subsidized<sup>25</sup>. The general practitioner (GP) acts as a gatekeeper to more specialized  
5 care. Treatment by a psychologist is subsidized for patients with specific conditions, such as reaction to specific  
6 traumatic events, moderate depression, and, specifically for citizens between 18 and 38 years, also moderate  
7 anxiety disorders. In 2014, the co-payment for a psychologist appointment was equivalent to 44€ per session<sup>26</sup>.  
8 Each psychologist is obliged to obtain a special authorization from the Danish Supervisory Board of Psychological  
9 Practice in order to be subsidized.  
10

### 11 ***Study population and data sources***

12  
13 The study was conducted as a follow-up study on mental health care utilization and use of antidepressants,  
14 examining participants who scored high on symptoms of depression in the Danish General Suburban Population  
15 Study (GESUS)<sup>27</sup> in the municipality of Næstved, Denmark. The municipality of Næstved is located 90 kilometres  
16 south of the capital Copenhagen. It has a total population of 81,000 and a socioeconomic index score 4% lower  
17 than the 2013 national average<sup>28</sup>. The GESUS data was collected from January 2010 through October 2013. The  
18 aim of GESUS was facilitate epidemiologic and genetic research by using information from questionnaires, health  
19 examinations, biochemical measurements, genetic variants and public registers to analyze the occurrence of co-  
20 morbidities (e.g. diabetes, cardiovascular disease, pulmonary disease and cancer) and mortality. All citizens over  
21 the age of 30 were invited, as were a random selection of one-quarter of citizens between 20 and 30 years of age.  
22 The study consists of 21,253 participants, equivalent to 43% of the invited citizens, the median age of participants  
23 were 56 years and 52 years for the non-participants. Data from the self-administered GESUS questionnaire was  
24 used in the present study.  
25  
26  
27  
28

29  
30 Persons with permanent residence in Denmark are registered in the Danish Civil Registration System (CRS)<sup>29</sup> and  
31 are assigned a unique 10-digit identification number, the Central Personal Register Number (CPR). The CPR  
32 number was registered in the survey data and thus provided a way to match respondents with information on  
33 their age and gender, and also made it is possible to identify the individuals in all public data registers in Denmark.  
34 In addition to the data sources already mentioned, data concerning vital status and dates of migration were  
35 gathered from the CRS as well.  
36  
37

38  
39 Using the CPRs from GESUS, we linked to national registers and tracked the use of healthcare services and  
40 antidepressants for four months (120 days) prior and six months (180 days) after the respondents entered the  
41 GESUS study, or until their death or migration, if that occurred before. Data from national registers covered the  
42 years 2010-2014 in order to fit a timeframe of four months prior to index date; however, the sample was reduced  
43 to include only respondents entering the GESUS study from May 2010, due to lack of data availability from 2009.  
44 The period of four months prior to the study was chosen assuming active treatment would include a treatment  
45 appointment or renewed prescription at least every three to four months.  
46  
47

### 48 ***Independent variables***

49 Data on independent variables came from GESUS.

### 50 ***Measure of need***

51  
52 Depression was chosen as an expression of need, with the Major Depression Inventory (MDI) as a measurement  
53 tool, extracted from the GESUS questionnaire. The MDI is based on the 12-item Likert scale and has been found to  
54 have an adequate internal and external validity for defining different stages of depression<sup>30</sup>. The MDI is also based  
55 on the ICD-10 diagnostic criteria for depressive disorder<sup>31</sup>, with scores ranging from 0 to 50: scores ≤20 do not  
56  
57  
58  
59

1  
2 indicate depression; mild depression is defined as a score from 21-25; moderate depression from 26-30; and  
3 severe depression from 31-50<sup>32</sup>. In the study, we collapsed moderate and severe depression into the same  
4 category, reducing the categories to three in order to gain statistical power: *no/few symptoms* (summed MDI 0 –  
5 20), *mild symptoms* (summed MDI 21-25), and *moderate/severe symptoms* (summed MDI 26+). This splitting of  
6 symptomatic individuals into only two groups (mild or moderate/severe) was supported by the recommended  
7 therapeutic approach at the time: patients with mild symptoms were recommended “watchful waiting” and  
8 perhaps supportive consultations, whereas patients with moderate to severe depression were recommended  
9 antidepressants and therapy by a psychologist or a psychiatrist<sup>33</sup>. If more than two items were missing in the MDI,  
10 the score was categorized as missing<sup>34</sup>.  
11  
12  
13  
14

### 15 *Socioeconomic position*

16 SEP is commonly measured by income, occupation, housing tenure, or education; higher education in particular is  
17 known to predict higher response rates in questionnaires<sup>35</sup>. Education and income were chosen as measures of  
18 SEP in this study due to the respondents’ age distribution skewing older than the general population; older age  
19 groups tend to have lower education, and they also have lower incomes, but occupation is not a useful SEP  
20 measurement for retired individuals. Education was classified as, *No postsecondary education*: if the respondent  
21 did not complete any postsecondary education; *1-3 years postsecondary education*: for vocational education of 1 -  
22 3 years; *or for academy/professional graduates of 1 - 3 years*; *3+ postsecondary education*: for baccalaureate who  
23 completed 3 - 4 years, and *Academic* for those who completed graduate study of  $\geq 5$  years. Students were  
24 categorized at the level that their studies would end in, e.g. students in doctoral programs would be categorized  
25 as Academics even though they had not yet completed 5 years of graduate study.  
26  
27  
28  
29

30 Information on income was also extracted from the GESUS questionnaire, where it was reported in Danish Kroner  
31 (DDK). 100 DDK equals 13.42€, a fixed exchange rate for many years. Income was grouped into three equal  
32 groups: *Less than 300,000 DDK*; *300,000-599,999 DDK*; and *600,000+ DDK* and reported as: *<40,250€*;  *$\geq 40,250 <$*   
33 *80,499€*; or  *$\geq 80,500€$* .  
34  
35

36 When both income and education show the same association to an outcome, it will be addressed as an association  
37 to SEP; otherwise the association will be addressed to the variable in question (income/education).  
38  
39  
40

### 41 *Extrinsic variables*

42 Sociodemographic data included age, gender, marital status, and cohabitation status.  
43

44 Information on *somatic comorbidity* included: previous acute myocardial infarction (AMI), arteriosclerosis, angina  
45 pectoris, stroke, cancer, diabetes mellitus, hyper- or hypo-thyroidism. The somatic disorders were all grouped into  
46 one variable. Previous depressive episodes were registered separately.  
47  
48

49 *Present medication* covered self-reported use of antidepressants. Respondents defined as being in *present*  
50 *treatment* included both participants who reported use of antidepressants and participants identified in registers,  
51 as described below, who had redeemed a prescription for antidepressants and/or had contact with a psychiatrist  
52 and/or a psychologist within four months prior to the date of returning the questionnaire (in the following termed  
53 the *index date*) with the depression score.  
54  
55

### 56 *Dependent variables*

57 Data on dependable variables was drawn from national registers.  
58  
59  
60

1  
2  
3 The outcome variables were graded according to the stepwise treatment of increasing intensity for depression as  
4 was recommended in the Danish national guidelines at the time<sup>25</sup>. The guidelines start with #1) counselling and #  
5 2) therapy provided by the GP, followed by # 3) prescription of antidepressants, followed by # 4) referral to  
6 therapy with a psychologist, then # 5) referral to treatment by a psychiatrist, and finally referral to # 6) outpatient  
7 public psychiatrist or eventually #7) inpatient treatment at a psychiatric hospital (see code definitions in  
8 Supplement Table 1; an additional #0 refer to no treatment contact). Emergency visits to a mental hospital were  
9 included in the category of hospital contacts. The more severe or non-respondent the depression is to the  
10 proscribed treatment, the higher the patient is supposed to move in the recommended treatment hierarchy.  
11 Treatment by psychologists (#step 4) or psychiatrists (#steps 5 # and #6), whether private or public, were pooled  
12 into one group in some analyses due to low numbers of observations. Data on the utilization of private  
13 psychiatrists, psychologists, and general practitioners (GPs) was drawn from the Danish National Health Service  
14 Register for Primary Care<sup>36</sup>. For psychologists, only subsidized services are in the register. Respondents covered by  
15 private insurance and treated for depression or anxiety are included in the data, as insurance agencies require  
16 referral from GPs to compensate the patient.  
17  
18  
19  
20

21 Mental health counselling provided by a GP consists of at least two talks within the first six months and up to  
22 seven talks within one year. This type of therapeutic counselling is registered and paid as additional  
23 reimbursement to the GP. In the study, this service was termed mental health counselling by a GP (MHC by GP).  
24 Topics for ordinary consultations by GP are not registered in the national registers.  
25  
26

27 Data on prescriptions for antidepressants (Anatomical Therapeutic Chemical (ATC) classification system N06A)  
28 were extracted from the Danish National Prescription Registry<sup>37,38</sup>. However, bupropion (ATC N06AX12), which is  
29 approved for the treatment of depression in some countries, was excluded from this study since it is only  
30 prescribed for smoking cessation in Denmark.  
31  
32

33 Information concerning public in- and outpatient psychiatric treatment was drawn from the Danish National  
34 Patient Register<sup>39</sup> (ICD-10 coded F00 – F99).  
35  
36

### 37 **Statistical analyses**

38 First, we estimated the association between SEP and the different binary outcome variables (that is, the five  
39 different types of health care contact: *No health care contact*, *GP consultation*, *Mental health counselling by GP*,  
40 *Antidepressants*, and *Specialized mental health services*) in separate logistic regression models, both uni- and  
41 multivariable. Each model was stratified into three MDI categories: no/few symptoms (MDI < 21), symptoms of  
42 mild depression (MDI 21-25), and symptoms of moderate to severe depression (MDI ≥ 26). The SEP category '*No*  
43 *postsecondary education* and income <40,250€' was used as the reference category. To examine a possible  
44 interaction between SEP and MDI category, we employed logistic regression models for each outcome, with  
45 patients having *No postsecondary education / <40,250€* and *no/few depression symptoms* as key reference.  
46  
47  
48

49 Second, in order to evaluate differences in visits and prescription rates, we estimated incidence rate ratios (IRR) by  
50 Poisson regression models for each type of contact (*GP consultation*, *Mental health counselling by GP*,  
51 *Antidepressants*, and *Specialized mental health services*). For each type of contact, analyses were restricted to  
52 those patients who had at least one contact. For exposure, death and emigration within 180 days after index date  
53 were taken into consideration. As above, analyses were stratified into MDI category, and the SEP category '*No*  
54 *education* and < 40,250€' was used as a reference category.  
55  
56  
57  
58  
59  
60

1  
2  
3 Finally, we performed a linear regression analysis for the effect of combined SEP and MDI category on the highest  
4 reached treatment level (see treatment progression described above). The treatment levels were categorized as  
5 shown in Supplementary Table 1 (0: no treatment/contact; 1: GP consultation; 2: MHC by GP; 3: antidepressants;  
6 4: psychologist; 5: private psychiatrist; 6: public psychiatrist; 7: psychiatric hospital). Patients having *No*  
7 *postsecondary education* / < 40,250€ and *no/few depression symptoms* were the key reference groups.  
8  
9

10 All multivariable regression models included age (20-59 versus 60+), gender, present treatment with  
11 antidepressants, and psychologist or psychiatrist (*yes/no*), in addition to the variable studied in the univariate  
12 (crude) analysis. In analyses including income, cohabitation was also included.  
13  
14

15 The significance level was 5% throughout, and all reported confidence intervals were 95%. All statistical analyses  
16 were performed using Stata 14<sup>40</sup>.  
17  
18

### 19 **Patient and Public Involvement**

20 The study did not involve patients or public in planning or execution.  
21  
22

### 23 **Ethics**

24 Access to data from the GESUS was approved by the GESUS board in December 2015. The data were stored at a  
25 server at Statistics Denmark. The collection and handling of the data has been approved by the Danish Data  
26 Protection Agency, Journal number: 2015-41-3984. Approval by an ethics committee is not required for register  
27 studies in Denmark.  
28  
29  
30  
31  
32  
33  
34  
35  
36  
37  
38  
39  
40  
41  
42  
43  
44  
45  
46  
47  
48  
49  
50  
51  
52  
53  
54  
55  
56  
57  
58  
59  
60

## Results

The study included 19,011 respondents from the GESUS study; the original 21,253 were reduced by 1,627 respondents who entered before May 2010 due to data unavailability for 2009. The respondents were further reduced by an additional 615 who did not have a valid MDI score (see flowchart, Supplement Figure 1). 29 deaths and four persons emigrating were included in the analysis only until death or migration. In all, 988 (5.2%) had symptoms of depression. Of these, 441 had symptoms of mild depression and 547 had symptoms of moderate and severe depression, and of the latter group 271 were rated severe.

**Table 1. Baseline characteristics of the study sample by MDI grade**

| MDI score                                        | All<br>n (pct.) | MDI < 21<br>None/few | MDI 21 - 25<br>Mild | MDI 26+<br>Moder./sev§ | MDI missing<br>NA |
|--------------------------------------------------|-----------------|----------------------|---------------------|------------------------|-------------------|
| <b>Symptoms of depression</b>                    |                 |                      |                     |                        |                   |
| All                                              | 19626 (100)     | 18023 (100)          | 441 (100)           | 547 (100)              | 615 (100)         |
| <b>In treatment*</b>                             |                 |                      |                     |                        |                   |
| No                                               | 18076 (92.1)    | 16860 (93.5)         | 334 (75.7)          | 335 (61.2)             | 547 (88.9)        |
| Yes                                              | 1550 (7.9)      | 1163 (6.5)           | 107 (24.3)          | 212 (38.8)             | 68 (11.1)         |
| <b>Gender</b>                                    |                 |                      |                     |                        |                   |
| Male                                             | 8927 (45.5)     | 8349 (46.3)          | 162 (36.7)          | 168 (30.7)             |                   |
| Female                                           | 10699 (54.5)    | 9674 (53.7)          | 279 (63.3)          | 379 (69.3)             |                   |
| <b>Age group</b>                                 |                 |                      |                     |                        |                   |
| 20-29                                            | 294 (1.5)       | 266 (1.5)            | 10 (2.3)            | 17 (3.1)               |                   |
| 30-39                                            | 2382 (12.1)     | 2206 (12.2)          | 79 (17.9)           | 86 (15.7)              |                   |
| 40-49                                            | 4186 (21.3)     | 3891 (21.6)          | 106 (24)            | 146 (26.7)             |                   |
| 50-59                                            | 4417 (22.5)     | 4100 (22.7)          | 115 (26.1)          | 144 (26.3)             |                   |
| 60-69                                            | 5123 (26.1)     | 4771 (26.5)          | 74 (16.8)           | 93 (17)                |                   |
| 70+                                              | 3224 (16.4)     | 2789 (15.5)          | 57 (12.9)           | 61 (11.2)              |                   |
| <b>Marital status</b>                            |                 |                      |                     |                        |                   |
| Married                                          | 13398 (68.3)    | 12519 (69.5)         | 234 (53.1)          | 259 (47.3)             |                   |
| Separated/divorced                               | 2174 (11.1)     | 1936 (10.7)          | 71 (16.1)           | 117 (21.4)             |                   |
| Widow/er                                         | 1385 (7.1)      | 1172 (6.5)           | 37 (8.4)            | 45 (8.2)               |                   |
| None of the above                                | 2669 (13.6)     | 2396 (13.3)          | 99 (22.4)           | 126 (23)               |                   |
| <b>Cohabiting</b>                                |                 |                      |                     |                        |                   |
| No                                               | 4342 (22.1)     | 3745 (20.8)          | 147 (33.3)          | 217 (39.7)             |                   |
| Yes (incl missing)                               | 15284 (77.9)    | 14278 (79.2)         | 294 (66.7)          | 330 (60.3)             |                   |
| <b>Education</b>                                 |                 |                      |                     |                        |                   |
| None (No postsecondary)                          | 2988 (15.2)     | 2502 (13.9)          | 93 (21.1)           | 136 (24.9)             |                   |
| Vocational/1-3yrs (1-3 years postsecondary)      | 8227 (41.9)     | 7645 (42.4)          | 169 (38.3)          | 199 (36.4)             |                   |
| Academy/professional <3yrs (1-3 yrs postsecund.) | 2156 (11)       | 2005 (11.1)          | 56 (12.7)           | 58 (10.6)              |                   |
| Baccalaureate /3-4yrs (3+ years postsecondary)   | 5024 (25.6)     | 4706 (26.1)          | 104 (23.6)          | 137 (25)               |                   |
| Academic/5+yrs (3+ years postsecondary)          | 1231 (6.3)      | 1165 (6.5)           | 19 (4.3)            | 17 (3.1)               |                   |
| <b>Income</b>                                    |                 |                      |                     |                        |                   |
| less than 150.000DDK (< 40,250€)                 | 1063 (5.4)      | 847 (4.7)            | 38 (8.6)            | 69 (12.6)              |                   |
| 150.000 - 299.999DDK (<40,250€)                  | 3406 (17.4)     | 3003 (16.7)          | 100 (22.7)          | 139 (25.4)             |                   |
| 300,000 - 449,999 DDK (≥40,250 <80,500€)         | 3601 (18.3)     | 3344 (18.6)          | 73 (16.6)           | 98 (17.9)              |                   |
| 450,000 - 599,000DDK (≥40,250 <80,500€)          | 3025 (15.4)     | 2863 (15.9)          | 64 (14.5)           | 66 (12.1)              |                   |
| 600,000 - 749,999DDK (≥80,500€)                  | 3245 (16.5)     | 3086 (17.1)          | 74 (16.8)           | 64 (11.7)              |                   |
| 750,000 - 899,999DDK (≥80,500€)                  | 1856 (9.5)      | 1794 (10)            | 22 (5)              | 29 (5.3)               |                   |
| 900,000 - 1,049,999DDK (≥80,500€)                | 693 (3.5)       | 667 (3.7)            | 12 (2.7)            | 9 (1.6)                |                   |
| 1,050,000DKR + (≥80,500€)                        | 706 (3.6)       | 691 (3.8)            | 8 (1.8)             | 5 (.9)                 |                   |
| Missing                                          | 2031 (10.3)     | 1728 (9.6)           | 50 (11.3)           | 68 812.4)              |                   |
| <b>Comorb. former depression</b>                 |                 |                      |                     |                        |                   |
| No                                               | 16755 (85.4)    | 15826 (87.8)         | 255 (57.8)          | 210 (38.4)             |                   |
| Yes                                              | 2484 (12.7)     | 1917 (10.6)          | 173 (39.2)          | 319 (58.3)             |                   |
| Missing                                          | 387 (2)         | 280 (1.6)            | 13 (2.9)            | 18 (3.3)               |                   |
| <b>Comorbidity somatic, all †</b>                |                 |                      |                     |                        |                   |
| No                                               | 13791 (70.3)    | 13109 (72.7)         | 195 (44.2)          | 168 (30.7)             |                   |
| Yes                                              | 5835 (29.7)     | 4914 (27.3)          | 246 (55.8)          | 379 (69.3)             |                   |
| <b>Medication antidepressants #</b>              |                 |                      |                     |                        |                   |
| No                                               | 18537 (94.5)    | 17213 (95.5)         | 363 (82.3)          | 385 (70.4)             | 576 (93.7)        |
| Yes                                              | 1089 (5.5)      | 810 (4.5)            | 78 (17.7)           | 162 (29.6)             | 39 (6.3)          |

§ Moderate or severe  
\* In treatment at index date or 120 days before by psychologist, psychiatrist, or antidepressant prescription, according to GESUS or registers  
† Somatic comorbidities: Ischemic heart disease, diabetes, cancer, metabolic diseases  
# replied in questionnaire



1  
2  
3 The baseline characteristics of the study sample are shown in table 1, in total, and stratified by severity of  
4 symptoms of depression. Respondents with symptoms of mild to severe depression tended to be: younger, more  
5 singles, living without a partner, and without formal education, compared to those with no/few symptoms.  
6

7 In the study sample respondents with no education beyond the secondary level were underrepresented and  
8 constituted half the proportion of the study population, according to Statistics Denmark; and the proportion with  
9 more than 3 years of postsecondary education was 32% in the sample compared to 19% in the population in  
10 Næstved<sup>41</sup>.  
11  
12

13 Table 2 shows odds ratios for mental health care treatment contacts. Among respondents with no/few symptoms,  
14 the group with three or more years of postsecondary education were 30% more likely to have *no healthcare*  
15 *contacts at all* when compared to the group without postsecondary education (adjusted odds ratio (aOR) 1.32,  
16 confidence interval (CI) 1.18 - 1.49). Similarly were respondents in the highest income group 66% more likely to  
17 have *no healthcare contacts at all* when compared to the lowest income group (aOR 1.66, CI 1.46-1.89). Higher  
18 education (3+ years) as well as high income was associated with fewer consultations with a GP and fewer  
19 prescriptions of antidepressants, compared to those without postsecondary education or with low income.  
20 However, increased educational level was associated with more contact with specialized services (aOR 1.81, CI  
21 1.13 - 2.88; aOR 1.92, CI 1.18 - 3.13); a difference not seen between the income groups.  
22  
23  
24

25 Among respondents with symptoms of mild depression, there was no statistically significant difference across  
26 educational groups or income groups in odds for contacts and prescriptions in the adjusted analyses, except those  
27 with 1-3 years of postsecondary education had a lower use of mental health counselling by GP (aOR 0.30, CI 0.10 -  
28 0.91) compared to respondents without any postsecondary education.  
29  
30

31 In the group with symptoms of moderate to severe symptoms of depression there was no difference across  
32 socioeconomic categories in any type of health care contact, when adjusted for age, gender and present  
33 treatment.  
34  
35  
36  
37  
38  
39  
40  
41  
42  
43  
44  
45  
46  
47  
48  
49  
50  
51  
52  
53  
54  
55  
56  
57  
58  
59  
60



1  
2  
3  
4  
5  
6  
7

8 **Table 2: Odds ratios for type of Mental health care treatment by educational- and income level stratified by MDI grade**

| Symptoms, depression                    | No/Few (MDI <21)           |                         | Mild (MDI 21-25)           |                         | Moderate/severe (MDI >25)  |                  |
|-----------------------------------------|----------------------------|-------------------------|----------------------------|-------------------------|----------------------------|------------------|
|                                         | Crude OR<br>(N=18023 pts.) | OR (adjusted)*          | Crude OR<br>(N = 441 pts.) | OR (adjusted)*          | Crude OR<br>(N = 547 pts.) | OR (adjusted)*   |
| <b>No contact at all</b>                |                            |                         |                            |                         |                            |                  |
| <b>Education</b>                        |                            |                         |                            |                         |                            |                  |
| No postsecondary educ.                  | Ref                        | Ref                     | Ref                        | Ref                     | Ref                        | Ref              |
| 1-3 years postsec. educ.                | <b>1.26 (1.13–1.40)</b>    | 1.10 (0.98–1.23)        | 1.96 (0.91–4.22)           | 1.62 (0.71–3.67)        | 1.73 (0.79–3.77)           | 1.62 (0.72–3.65) |
| 3+ years postsec. educ.                 | <b>1.54 (1.38–1.72)</b>    | <b>1.32 (1.18–1.49)</b> | <b>2.38 (1.05–5.38)</b>    | 2.01 (0.84–4.83)        | 1.99 (0.87–4.55)           | 1.79 (0.76–4.23) |
| <b>Income</b>                           | (N=16295)                  |                         | (N=391)                    |                         | (N=479)                    |                  |
| Income < 40,250€                        | Ref                        | Ref**                   | Ref                        | Ref**                   | Ref                        | Ref**            |
| Income ≥ 40,250 <80,500€                | <b>1.69 (1.53–1.87)</b>    | <b>1.39 (1.24–1.56)</b> | 1.20 (0.62–2.33)           | 0.79 (0.36–1.76)        | 1.74 (0.89–3.40)           | 1.59 (0.72–3.52) |
| Income ≥80,500€                         | <b>2.27 (2.06–2.51)</b>    | <b>1.66 (1.46–1.89)</b> | 1.90 (0.99–3.63)           | 1.35 (0.55–3.33)        | 1.16 (0.51–2.63)           | 1.04 (0.38–2.82) |
| <b>GP consultation</b>                  |                            |                         |                            |                         |                            |                  |
| No postsecondary educ.                  | Ref                        | Ref                     | Ref                        | Ref                     | Ref                        | Ref              |
| 1-3 years postsec. educ.                | 0.80 (0.72–0.89)           | 0.92 (0.82–1.02)        | 0.52 (0.26–1.06)           | 0.64 (0.31–1.35)        | 0.68 (0.35–1.31)           | 0.70 (0.36–1.37) |
| 3+ years postsec. educ.                 | 0.66 (0.59–0.74)           | <b>0.77 (0.68–0.86)</b> | <b>0.46 (0.21–0.97)</b>    | 0.54 (0.24–1.19)        | 0.69 (0.34–1.41)           | 0.74 (0.36–1.53) |
| <b>Income</b>                           |                            |                         |                            |                         |                            |                  |
| Income < 40,250€                        | Ref                        | Ref**                   | Ref                        | Ref**                   | Ref                        | Ref**            |
| Income ≥ 40,250 <80,500€                | <b>0.60 (0.54–0.66)</b>    | <b>0.72 (0.64–0.80)</b> | 0.90 (0.48–1.67)           | 1.25 (0.60–2.61)        | 0.55 (0.30–1.00)           | 0.53 (0.27–1.07) |
| Income ≥80,500€                         | <b>0.45 (0.41–0.50)</b>    | <b>0.60 (0.53–0.68)</b> | 0.63 (0.34–1.84)           | 0.79 (0.34–1.84)        | 0.94 (0.44–1.97)           | 0.81 (0.33–2.01) |
| <b>GP Mental health counseling</b>      |                            |                         |                            |                         |                            |                  |
| No postsecondary educ.                  | Ref                        | Ref                     | Ref                        | Ref                     | Ref                        | Ref              |
| 1-3 years postsec. educ.                | 1.20 (0.84–1.71)           | 1.09 (0.76–1.57)        | <b>0.34 (0.12–0.97)</b>    | <b>0.30 (0.10–0.91)</b> | 1.20 (0.61–2.33)           | 1.27 (0.65–2.50) |
| 3+ years postsec. educ.                 | 1.31 (0.90–1.89)           | 1.21 (0.83–1.76)        | 1.26 (0.50–3.17)           | 1.03 (0.38–2.81)        | 1.23 (0.59–2.55)           | 1.30 (0.62–2.73) |
| <b>Income</b>                           |                            |                         |                            |                         |                            |                  |
| Income < 40,250€                        | Ref                        | Ref**                   | Ref                        | Ref**                   | Ref                        | Ref**            |
| Income ≥ 40,250 <80,500€                | 1.07 (0.80–1.43)           | 1.09 (0.78–1.53)        | 1.14 (0.43–3.05)           | 1.40 (0.44–4.47)        | <b>2.06 (1.05–4.02)</b>    | 1.79 (0.81–3.97) |
| Income ≥80,500€                         | 0.84 (0.62–1.14)           | 0.85 (0.57–1.28)        | 1.20 (0.44–3.31)           | 1.33 (0.34–3.96)        | 1.66 (0.77–3.59)           | 1.35 (0.52–3.53) |
| <b>Antidepressants</b>                  |                            |                         |                            |                         |                            |                  |
| No postsecondary educ.                  | Ref                        | Ref                     | Ref                        | Ref                     | Ref                        | Ref              |
| 1-3 years postsec. educ.                | 0.85 (0.71–1.01)           | 0.75 (0.55–1.01)        | 0.96 (0.52–1.77)           | 1.11 (0.47–2.65)        | 0.72 (0.47–1.10)           | 0.82 (0.43–1.56) |
| 3+ years postsec. educ.                 | <b>0.69 (0.57–0.83)</b>    | <b>0.69 (0.50–0.95)</b> | 1.17 (0.60–2.29)           | 1.40 (0.54–3.63)        | 0.65 (0.40–1.05)           | 0.86 (0.42–1.77) |
| <b>Income</b>                           |                            |                         |                            |                         |                            |                  |
| Income < 40,250€                        | Ref                        | Ref**                   | Ref                        | Ref**                   | Ref                        | Ref**            |
| Income ≥ 40,250 <80,500€                | <b>0.67 (0.57–0.78)</b>    | <b>0.71 (0.52–0.95)</b> | 0.77 (0.43–1.39)           | 1.29 (0.51–3.25)        | 0.67 (0.43–1.03)           | 0.53 (0.25–1.11) |
| Income ≥80,500€                         | <b>0.44 (0.37–0.52)</b>    | <b>0.56 (0.39–0.80)</b> | 0.63 (0.33–1.20)           | 1.25 (0.39–3.96)        | <b>0.53 (0.32–0.89)</b>    | 0.53 (0.20–1.36) |
| <b>Specialized services<sup>‡</sup></b> |                            |                         |                            |                         |                            |                  |
| No postsecondary educ.                  | Ref                        | Ref                     | Ref                        | Ref                     | Ref                        | Ref              |
| 1-3 years postsec. educ.                | <b>1.94 (1.24–3.03)</b>    | <b>1.81 (1.13–2.88)</b> | 1.34 (0.52–3.46)           | 0.79 (0.27–2.36)        | 1.30 (0.70–2.43)           | 1.73 (0.87–3.41) |
| 3+ years postsec. educ.                 | <b>1.91 (1.20–3.05)</b>    | <b>1.92 (1.18–3.13)</b> | 2.01 (0.75–5.41)           | 1.41 (0.45–4.36)        | 1.25 (0.63–2.49)           | 1.67 (0.78–3.57) |
| <b>Income</b>                           |                            |                         |                            |                         |                            |                  |
| Income < 40,250€                        | Ref                        | Ref**                   | Ref                        | Ref**                   | Ref                        | Ref**            |
| Income ≥ 40,250 <80,500€                | 1.03 (0.75–1.42)           | 1.11 (0.76–1.64)        | 0.67 (0.30–1.49)           | 0.79 (0.36–1.76)        | 1.32 (0.73–2.37)           | 1.47 (0.69–3.14) |
| Income ≥80,500€                         | 0.89 (0.64–1.23)           | 0.99 (0.63–1.55)        | 0.96 (0.44–2.09)           | 1.35 (0.55–3.33)        | 1.05 (0.53–2.11)           | 1.36 (0.52–3.56) |

34  
35  
36  
37  
38  
39  
40  
41 \* Adjusted for age- group 60 +/-, gender, present treatment of antidepressants, psychologist or psychiatrist  
42 \*\* Adjusted for age-group 60 +/-, gender, present treatment of antidepressants, psychologist or psychiatrist, cohabitation  
43 <sup>‡</sup> Psychologist or psychiatrist public or private  
44 Results significant within a 95% confidence interval are marked in bold

**Table 3 Incidence rate ratios for *Mental health care treatments* by education- and income level stratified by MDI grade**

| Symptoms of depression             | No/few (MDI <21)        |                         | Mild (MDI 21-25)        |                         | Moderate/severe (MDI >25) |                         |
|------------------------------------|-------------------------|-------------------------|-------------------------|-------------------------|---------------------------|-------------------------|
| GP consultation                    | IRR (crude)             | IRR (Adjusted)*         | IRR (crude)             | IRR (Adjusted)*         | IRR (crude)               | IRR (Adjusted)*         |
| <b>Education</b>                   | (N=18023)               |                         | (N=441)                 |                         | (N=547)                   |                         |
| No postsecondary educ.             | Ref                     | Ref                     | Ref                     | Ref                     | Ref                       | Ref                     |
| 1-3 years postsec. educ.           | <b>0.82 (0.80–0.84)</b> | <b>0.87 (0.85–0.89)</b> | <b>0.79 (0.69–0.89)</b> | <b>0.88 (0.77–0.99)</b> | <b>0.81 (0.73–0.89)</b>   | <b>0.81 (0.74–0.89)</b> |
| 3+ years postsec. educ.            | <b>0.77 (0.75–0.80)</b> | <b>0.84 (0.81–0.86)</b> | <b>0.74 (0.64–0.86)</b> | <b>0.83 (0.72–0.97)</b> | <b>0.76 (0.68–0.85)</b>   | <b>0.77 (0.69–0.86)</b> |
| <b>Income</b>                      | (N=16295)               |                         | (N=391)                 |                         | (N=479)                   |                         |
| Income < 40,250€                   | Ref                     | Ref**                   | Ref                     | Ref**                   | Ref                       | Ref**                   |
| Income ≥40,250 <80,500€            | <b>0.81 (0.80-0.83)</b> | <b>0.88 (0.85-0.90)</b> | <b>0.75 (0.66–0.85)</b> | 0.88 (0.76–1.02)        | <b>0.74 (0.67-0.82)</b>   | <b>0.81 (0.72-0.91)</b> |
| Income ≥80,500€                    | <b>0.67 (0.66-0.69)</b> | <b>0.78 (0.76-0.81)</b> | <b>0.63 (0.55–0.73)</b> | <b>0.78 (0.65–0.94)</b> | <b>0.66 (0.59-0.75)</b>   | <b>0.75 (0.65-0.86)</b> |
| <b>GP Mental health counseling</b> |                         |                         |                         |                         |                           |                         |
| No postsecondary educ.             | Ref                     | Ref                     | Ref                     | Ref                     | Ref                       | Ref                     |
| 1-3 years postsec. educ.           | 0.93 (0.73–1.20)        | 0.93 (0.72–1.20)        | 1.36 (0.70–2.64)        | 1.22 (0.58–2.56)        | 1.08 (0.74–1.58)          | 1.13 (0.77–1.65)        |
| 3+ years postsec. educ.            | 0.93 (0.72–1.22)        | 0.93 (0.71–1.21)        | 0.85 (0.44–1.61)        | 0.82 (0.40–1.69)        | 0.76 (0.48–1.18)          | 0.79 (0.50–1.24)        |
| Income < 40,250€                   | Ref                     | Ref                     | Ref                     | Ref                     | Ref                       | Ref                     |
| Income ≥40,250 <80,500€            | 0.98 (0.79–1.22)        | 0.93 (0.74–1.18)        | 0.73 (0.39–1.36)        | 0.97 (0.49–1.91)        | 0.83 (0.56–1.23)          | 0.69 (0.42–1.14)        |
| Income ≥80,500€                    | 1.00 (0.80–1.25)        | 0.94 (0.71–1.24)        | <b>0.45 (0.22–0.96)</b> | <b>0.39 (0.18–0.88)</b> | 1.07 (0.69–1.64)          | 0.86 (0.50–1.48)        |
| <b>Antidepressants#</b>            |                         |                         |                         |                         |                           |                         |
| No postsecondary educ.             | Ref                     | Ref                     | Ref                     | Ref                     | Ref                       | Ref                     |
| 1-3 years postsec. educ.           | 0.95 (0.85–1.05)        | 0.93 (0.84–1.03)        | 1.03 (0.73–1.46)        | 1.05 (0.73–1.50)        | 1.07 (0.89–1.28)          | 1.06 (0.88–1.27)        |
| 3+ years postsec. educ.            | 1.00 (0.89–1.12)        | 1.01 (0.90–1.13)        | 1.10 (0.76–1.59)        | 1.11 (0.77–1.62)        | 1.12 (0.91–1.37)          | 1.08 (0.88–1.33)        |
| Income < 40,250€                   | Ref                     | Ref**                   | Ref                     | Ref**                   | Ref                       | Ref**                   |
| Income ≥40,250 <80,500€            | 0.98 (0.90–1.08)        | 1.00 (0.90–1.11)        | 1.09 (0.79–1.49)        | 1.29 (0.90–1.84)        | 0.97 (0.80–1.18)          | 0.92 (0.73–1.16)        |
| Income ≥80,500€                    | 0.92 (0.83–1.02)        | 0.95 (0.84–1.09)        | 1.02 (0.71–1.46)        | 1.18 (0.74–1.88)        | 1.18 (0.94–1.47)          | 1.11 (0.84–1.46)        |
| <b>Specialized services#</b>       |                         |                         |                         |                         |                           |                         |
| No postsecondary educ.             | Ref                     | Ref                     | Ref                     | Ref                     | Ref                       | Ref                     |
| 1-3 years postsec. educ.           | 0.97 (0.77–1.22)        | 0.94 (0.75–1.19)        | 1.11 (0.71–1.71)        | 0.93 (0.58–1.48)        | 0.93 (0.72–1.21)          | 0.94 (0.72–1.22)        |
| 3+ years postsec. educ.            | 1.06 (0.84–1.34)        | 1.02 (0.80–1.29)        | 1.32 (0.85–2.05)        | 1.02 (0.63–1.66)        | 1.09 (0.82–1.43)          | 1.10 (0.83–1.46)        |
| Income < 40,250€                   | Ref                     | Ref**                   | Ref                     | Ref**                   | Ref                       | Ref**                   |
| Income ≥40,250 <80,500€            | 1.09 (0.92–1.28)        | 1.20 (0.99–1.45)        | 1.30 (0.91–1.85)        | 1.30 (0.88–1.94)        | 1.01 (0.78–1.30)          | 0.77 (0.57–1.06)        |
| Income ≥80,500€                    | 1.18 (1.00–1.39)        | <b>1.35 (1.09–1.68)</b> | <b>1.58 (1.14–2.19)</b> | 1.21 (0.79–1.86)        | 1.46 (1.12–1.92)          | 1.00 (0.69–1.45)        |

\* Adjusted for age-group 60 +/-, gender, present treatment of antidepressants, psychologist or psychiatrist  
 \*\* Adjusted for age-group 60 +/-, gender, present treatment of antidepressants, psychologist or psychiatrist, cohabitation  
 # Psychologist or psychiatrist, public or private  
 # Number reimbursed prescriptions  
 Results significant within a 95% confidence interval are marked in bold

Table 3 shows the rate (incidence rate ratios (IRR)) of visits and number of prescriptions of antidepressants stratified by severity of symptoms. At all grades of symptoms of depression short education and low income were associated higher rates of visits to GP..

Among participants with no/few symptoms of depression, high income was associated with more frequent visits to a specialist, compared to the low income group (aIRR 1.35, CI 1.09-1.68).

Among participants with mild symptoms of depression high income was associated with a lower visit rate for GP-MHC than the low-income group (aIRR 0.39, CI 0.18-0.88).

In the group with symptoms of moderate to severe depression there were no significant differences between income- or educational groups in visit rates to services beyond GP, when adjusted for age, gender, and present treatment among those using services.

Table 4 shows the highest gained treatment level within the 180 day window in crude numbers. (Supplementary table 2 shows Number and mean number of mental health care treatment by MDI grade). More severe symptoms were met with a higher level of treatment, though 10% of the respondents with symptoms of moderate to severe

depression had no contact at all. 47% of the 547 with symptoms of moderate to severe depression had no treatment or contacts beyond a GP consultation.

**Table 4. Highest gained treatment level by MDI grade**

| Final treatment level\MDI grade | No/few       | Mild       | Mod./severe |
|---------------------------------|--------------|------------|-------------|
| No contacts                     | 4540 (25.2)  | 73 (16.6)  | 56 (10.2)   |
| GP consultation                 | 12084 (67)   | 257 (58.3) | 259 (47.3)  |
| GP MHC                          | 160 (.9)     | 5 (1.1)    | 20 (3.7)    |
| Antidepressants#                | 931 (5.2)    | 64 (14.5)  | 125 (22.9)  |
| Psychologists                   | 162 (.9)     | 17 (3.9)   | 27 (4.9)    |
| Priv psychiatrist               | 96 (.5)      | 18 (4.1)   | 39 (7.1)    |
| Out-pat. Psychiatry             | 17 (.1)      | 3 (.7)     | 7 (1.3)     |
| Admission MH & EA **            | 33 (.2)      | 4 (.9)     | 14 (2.6)    |
| Sum                             | 18.023 (100) | 441 (100)  | 547 (100)   |

Percent's in brackets

# Reimbursed prescriptions

\* Contact to either psychologist or psychiatrist, public or private

\*\* MH: Mental hospital; EA: Emergency access psychiatric ward

Table 5 shows that respondents with symptoms of depression gained a significantly higher treatment level, increasing with higher symptom score, compared to those with no/few symptoms and no postsecondary education or low income. (Supplementary table 3 shows highest treatment level gained within six months by education, income and severity of symptoms, in crude numbers and percentage.) For the group with no/few symptoms, respondents with 3+ years of postsecondary education or higher income reached a lower level overall. We found no statistically significant differences between educational groups stratified by grade of symptoms, but a significant increase in treatment level within each educational group when depression score increased from no/few symptoms to symptoms of mild depression, and again when it changed to symptoms of moderate/severe depression (results not shown). SEP measured by income had similar outcomes, but differed in the group with mild symptoms of depression, where only respondents with high income gained a higher treatment level compared to the low income group with no/few symptoms.

**Table 5. Mean level of Mental health care treatment by educational and income level and MDI grade**

| No/few symptoms of depression                 |               | $\beta^*$                   |
|-----------------------------------------------|---------------|-----------------------------|
| <b>Education</b> .97 (N=19011)                |               |                             |
| No postsecondary education                    | 0.98 (N=2502) | (Ref)                       |
| 1-3 years postsecondary education             | 0.94 (N=9650) | <b>-0.06 (-0.09; -0.03)</b> |
| 3+ years postsecondary education              | 0.87 (N=5871) | <b>-0.05 (-0.08; -0.02)</b> |
| <b>Income</b> .96 (N=17165)                   |               |                             |
| Income < 40,250€                              | 1.07 (N=3850) | (Ref)**                     |
| Income ≥40,250 <80,500€                       | 0.93 (N=6207) | -0.01 (-0.04; 0.02)         |
| Income ≥80,500€                               | 0.81 (N=6238) | <b>-0.12 (-0.15; -0.09)</b> |
| <b>Mild symptoms of depression</b>            |               |                             |
| No postsecondary education                    | 1.49 (N=93)   | <b>0.15 (0.01; 0.29)</b>    |
| 1-3 years postsecondary education             | 1.47 (N=225)  | <b>0.14 (0.05; 0.24)</b>    |
| 3+ years postsecondary education              | 1.58 (N=123)  | <b>0.22 (0.10; 0.35)</b>    |
| Income < 40,250€                              | 1.62 (N=138)  | 0.05 (-0.06; 0.17)          |
| Income ≥40,250 <80,500€                       | 1.46 (N=137)  | 0.11 (-0.01; 0.23)          |
| Income ≥80,500€                               | 1.47 (N=116)  | <b>0.22 (0.09; 0.34)</b>    |
| <b>Moderate/severe symptoms of depression</b> |               |                             |
| No postsecondary education                    | 2.18 (N=136)  | <b>0.37 (0.26; 0.49)</b>    |
| 1-3 years postsecondary education             | 1.99 (N=257)  | <b>0.35 (0.26; 0.44)</b>    |
| 3+ years postsecondary education              | 2.01 (N=154)  | <b>0.45 (0.33; 0.56)</b>    |
| Income < 40,250€                              | 2.10 (N=208)  | <b>0.28 (0.18; 0.37)</b>    |
| Income ≥40,250 <80,500€                       | 2.06 (N=164)  | <b>0.40 (0.29; 0.51)</b>    |
| Income ≥80,500€                               | 1.80 (N=107)  | <b>0.34 (0.21; 0.47)</b>    |

\* Adjusted for agegr 60 +/-, gender, present treatment of antidepressants, psychologist or psychiatrist

\*\*Adjusted for agegr 60 +/-, gender, present treatment of antidepressants, psychologist or psychiatrist, cohabitation

Treatment levels: 0; no contact; 1: GP consultation; 2: GP MHC; 3: Antidepressants; 4: psychologist;

5: priv. psychiatrist; 6: publ. psychiatrist; 7: psychiatric hospital & emergency visits

## Discussion

Participants with symptoms of depression were treated according to the severity of the symptoms, independent of SEP; however, more than half with moderate to severe symptoms received no treatment beyond GP consultation. People in low SEP and with no/few symptoms of depression were more often treated with antidepressants.

### Symptoms of depression & use of services

Respondents in need and in contact with health care providers were treated according to their needs. This finding aligns with other studies on treatment of depression<sup>42</sup> and a recent Swedish study designed as ours<sup>43</sup>. Some studies likewise found SEP had no independent impact on the type of treatment<sup>19 44 45</sup> or intensity of treatment<sup>37;46</sup>. Yet some studies have found that higher education was associated with more use of specialized mental health care, even when adjusted for needs<sup>47-49</sup>. However, beside the Swedish study all these prior studies rely on recalled service use only, however, and thus may be subject to recall bias.

### Symptoms of depression & no use

A Swedish follow-up study of more than 2,000 respondents with symptoms of depression (MDI>20) or anxiety likewise found that one-third did not seek care at all. People with a higher education were less likely to seek care at all, and if they did, they more often sought help from a psychologist<sup>50</sup>. Other studies report that 35-52% of respondents with symptoms of severe common mental disorders have no treatment contacts<sup>36;51</sup>. As in the

1  
2  
3 Swedish study, we found respondents with 3+ years of postsecondary education or high income were less likely to  
4 have contacts at all, compared to respondents without postsecondary education or low income, but these  
5 differences were not significant in the groups with symptoms of depression.  
6

7 GPs' ability to detect depression could be questioned, since only half the respondents with moderate to severe  
8 symptoms of depression are treated. When compared to ratings determined through semi-structured interviews,  
9 the detection rates for depression in primary health care are relatively low, with a sensitivity rate of 50% and a  
10 specificity rate of 81%<sup>52</sup> in 2009, and more recently in 2014, a sensitivity rate of 51% and a specificity rate of 87%,  
11 when compared to a standardised instrument as the Patient Health Questionnaire-9<sup>53</sup>. The use of depression  
12 scoring tools validated for primary care could improve detection rates; if self-administered, it would be less time-  
13 consuming for GPs and perhaps a more realistic approach<sup>49</sup>. It is noteworthy that the proportion receiving the  
14 highest treatment level from a GP was the same across educational groups.  
15  
16  
17

18 A German study on trends in non-help-seeking for mental disorders found a downward trend, finding that 57% of  
19 the citizens with present symptoms of a mental disorder had never sought help for a mental problem in the years  
20 2009-2012<sup>54</sup>; this result is very similar to the findings of our study.  
21  
22  
23  
24

#### 25 *No/few symptoms of depression & use of services*

26 The group that was treated, but scored with no/few symptoms of depression, may indicate emerging needs or an  
27 overuse of services. Since respondents did not each undergo additional screening by a professional, there is a lack  
28 of verification for the level of need beyond the self-reported symptoms on the inventory. However, we consider a  
29 comparison across socioeconomic groups relevant in this group, as in the other symptoms groups.  
30  
31

32 Firstly, we found no/few symptoms of depression was associated with more use of specialized mental health  
33 services for respondents with postsecondary education when compared to those with no postsecondary  
34 education, adjusting for age, gender, and present treatment. Notably, when income was used as an indicator of  
35 SEP, no difference in use of specialist services was found. Other researchers have found higher education is  
36 associated with more use of specialized services and suggest it could be due to the fact that higher-educated  
37 individuals might recognize and accept psychiatric needs more than lower-educated individuals<sup>47</sup>; or that mental  
38 health treatment makes heavy demands on a client's cognitive capacities and this presents a greater obstacle for  
39 people with less education<sup>48</sup>. What is seen in the group with no/few symptoms could be the treatment of  
40 emerging mental health problems, and a result of specialized services being requested more by patients with  
41 postsecondary education, or that specialized services are a more evident first choice by the GP for some patients.  
42 We had also expected the expenses associated with the use of psychologists in Denmark<sup>55</sup> would have an impact,  
43 but it did not.  
44  
45  
46  
47

48 An Australian study found that only a small proportion (4%) of individuals without any disorders or need indicators  
49 were among those receiving mental health care. Though this group comprised a fair proportion of service users,  
50 the vast majority only sought brief primary care or counselling treatment rather than consultations with  
51 psychiatrists, where they constituted only 7% of psychiatry patients<sup>56</sup>. That study did not relate the use of services  
52 to SEP. However, a Canadian study did find that individuals using mental health care and having no symptoms of  
53 mental disorders were better educated compared to those with mental disorders using the services<sup>16</sup>.  
54  
55  
56  
57  
58  
59  
60

1  
2  
3 Secondly, we found that prescription of antidepressants was more common in the group with no/few symptoms  
4 and in low SEP. Similar findings were shown in another Australian study, where low SEP was associated with  
5 higher prescription rates not attributable to higher rates of depression<sup>57</sup>. The most plausible reason for this  
6 association is that depressive disorders are more prevalent in this group and antidepressants are the first choice of  
7 treatment, or that antidepressants are more commonly used as analgesic medications in this group, as chronic  
8 pain is more common for persons with low SEP<sup>58</sup>.

### 10 11 *Strengths and limitations*

12 A major strength of this study was that we were able to obtain reliable data on need from a large sample of  
13 people in the GESUS as well as high-quality data on healthcare contacts and prescriptions of antidepressants from  
14 national registers, addressing challenges common in studies of equality in health care<sup>9</sup>. To our knowledge, this is  
15 the first study combining survey data of depression scores and SEP with register data on mental health care  
16 treatment. Thus we managed to avoid the inherent problem of recall bias, which is a common problem in these  
17 types of studies<sup>59</sup>.

18  
19  
20  
21 SEP may be defined in different several ways<sup>35</sup>, but in the present study we used education and income as  
22 indicators of SEP. The span of respondents seen in the sample, from a few students to a high proportion of older  
23 and retired persons, indicated that income and employment status would be less potent to differentiate the  
24 resources that respondents could be expected to have. For that reason, education was the first choice, paired with  
25 income, even though older age is associated with lower educational attainment<sup>27</sup>. Additionally, education seems a  
26 particularly important factor when evaluating the use of health care specialists<sup>10</sup>.

27  
28  
29 The study related respondents' use of services based on an indication of need (MDI score) that might not capture  
30 the fluctuations in all six months afterwards, which is a potential limitation. Even though need will change over  
31 time, such change would not be expected to differ among the socioeconomic groups; however, if it did, it would  
32 be expected to trend towards higher need for those in low SEP.

33  
34  
35 The actual reasons for treatment contacts were not known, nor were the reasons for prescriptions of  
36 antidepressants known; both could have been for disorders other than depression, indicating a potential  
37 limitation of the study design. The variety of other possible disorders would tend to be more common for people  
38 in low SEP, and may explain the generally higher use of GP by respondents in low SEP.

39  
40  
41 Another potential limitation is that not all services used are included in the registers. If a patient is not referred by  
42 a GP and pays the full expense for a treatment out of pocket, there is no state reimbursement and subsequently  
43 no registration of the treatment in the registers. This would usually indicate high-income individuals, which is  
44 often associated with more years of postsecondary education. We do not expect this to be a common scenario,  
45 though we have no data to support this.

### 46 47 48 *Implications*

49 For clinicians and policy makers it is of particular interest to know that the treatment of patients with symptoms of  
50 depression matched the severity of symptoms and was independent of the SEP of the patient.

51  
52  
53 A high proportion with symptoms of depression was not treated. Initiatives to improve mental health literacy  
54 might help people with symptoms of depression to address mental health problems when consulting their GP and  
55 thereby increase treatment rates. Better attention to mental health by the GP is also necessary, and probably a  
56 more systematic approach in evaluating patients' mental health should be implemented.



1  
2  
3 An interesting disparity between education and income on use of specialized services was found in the group with  
4 no/few symptoms. Are specialized services – most likely psychologists – the first choice for the GP when the  
5 patient has more years of postsecondary education? Is the initial treatment of patients with depressive symptoms  
6 different depending on their education, and why are the prescription rates of antidepressants much higher for  
7 persons in low SEP compared to those in high SEP? These issues deserve in-depth exploration in order to more  
8 fully address issues of health inequity.  
9  
10

### 11 12 **Conclusion**

13  
14 We found no differentiation between socioeconomic groups in the treatment of respondents with symptoms of  
15 moderate to severe depression when looking at treatment contact, frequency of contacts, or level of treatment.  
16 However, more than half the respondents with moderate to severe symptoms had no treatment beyond GP  
17 consultation. Respondents with no/few symptoms of depression used services differently; people with low SEP  
18 were more often treated with antidepressants than people with high SEP, whereas people with postsecondary  
19 education were more likely to receive specialist services compared to those without postsecondary education,  
20 though this association was not found for income.  
21  
22  
23  
24  
25  
26  
27  
28  
29

### 30 **Author contributions**

31 The statistical analyses were performed by statistician SW. AP conceived the research and wrote the first draft of  
32 the manuscript assisted by FBW. FBW contributed substantially to the study design and choice of analysis. AH, ES,  
33 and LH contributed to the data analysis, interpretation of results and critical revision of the manuscript.  
34  
35

### 36 **Acknowledgement**

37 With acknowledgment to Mogens Vestergaard professor Department of Public Health, Aarhus University,  
38 Denmark for comments and contributions in the initial stage of the study. We thank GESUS for sharing data, the  
39 Health Research Foundation of Region Zealand for financial support, and former head nurse Tove Kjærbo for  
40 initiating the study.  
41  
42

43 Data sharing: no additional data available.  
44  
45  
46  
47  
48  
49  
50  
51  
52  
53  
54  
55  
56  
57  
58  
59  
60



1. OECD. Health policies and data: Health Inequalities 2017 [updated 6/11/2017. Available from: <http://www.oecd.org/els/health-systems/inequalities-in-health.htm>.
2. World Health Organization. Health 2020. A European policy framework and strategy for the 21st century. Copenhagen, 2013:1-184.
3. Lynch JW, Kaplan GA, Shema SJ. Cumulative impact of sustained economic hardship on physical, cognitive, psychological, and social functioning. *N Engl J Med* 1997;337(26):1889-95. doi: 10.1056/NEJM199712253372606 [doi]
4. Ahnquist J, Wamala SP. Economic hardships in adulthood and mental health in Sweden. The Swedish National Public Health Survey 2009. *BMC Public Health* 2011;11:788. doi: 10.1186/1471-2458-11-788
5. Lorant V, Deliege D, Eaton W, et al. Socioeconomic inequalities in depression: a meta-analysis. *Am J Epidemiol* 2003;157(2):98-112.
6. Lorant V, Croux C, Weich S, et al. Depression and socio-economic risk factors: 7-year longitudinal population study. *Br J Psychiatry* 2007;190:293-8.:293-98.
7. Muntaner C, Eaton WW, Miech R, et al. Socioeconomic position and major mental disorders. *Epidemiologic reviews* 2004;26(1):53-62.
8. Dohrenwend BP, Levav I, Shrout PE, et al. Socioeconomic status and psychiatric disorders: the causation-selection issue. *Science (New York, NY)* 1992;255(5047):946-52. [published Online First: 1992/02/21]
9. World Health Organization. Depression and Other Common Mental Disorders: Global Health Estimates. Geneva, 2017:1-24.
10. Laursen TM, Musliner KL, Benros ME, et al. Mortality and life expectancy in persons with severe unipolar depression. *J Affect Disord* 2016;193:203-7. doi: 10.1016/j.jad.2015.12.067. Epub;2016 Jan 6.:203-07.
11. Goddard M, Smith P. Equity of access to health care services: theory and evidence from the UK. *Soc Sci Med* 2001;53(9):1149-62.
12. Fjaer EL, Balaj M, Stornes P, et al. Exploring the differences in general practitioner and health care specialist utilization according to education, occupation, income and social networks across Europe: findings from the European social survey (2014) special module on the social determinants of health. *Eur J Public Health* 2017;27(suppl\_1):73-81.
13. Hanratty B, Zhang T, Whitehead M. How close have universal health systems come to achieving equity in use of curative services? A systematic review. *Int J Health Serv* 2007;37(1):89-109.
14. ten Have M, Iedema J, Ormel J, et al. Explaining service use for mental health problems in the Dutch general population: the role of resources, emotional disorder and functional impairment. *Soc Psychiatry Psychiatr Epidemiol* 2006;41(4):285-93.
15. Andrews G, Issakidis C, Carter G. Shortfall in mental health service utilisation. *Br J Psychiatry* 2001;179:417-25.:417-25.
16. Kohn R, Saxena S, Levav I, et al. The treatment gap in mental health care. *Bull World Health Organ* 2004;82(11):858-66.
17. Lin E, Goering P, Offord DR, et al. The use of mental health services in Ontario: epidemiologic findings. *Can J Psychiatry* 1996;41(9):572-77.
18. Fleury MJ, Ngui AN, Bamvita JM, et al. Predictors of healthcare service utilization for mental health reasons. *Int J Environ Res Public Health* 2014;11(10):10559-86.
19. Glozier N, Davenport T, Hickie IB. Identification and management of depression in Australian primary care and access to specialist mental health care. *Psychiatr Serv* 2012;63(12):1247-51. doi: 1392910 [pii];10.1176/appi.ps.201200017 [doi]

- 1  
2  
3 20. Boerema AM, Ten Have M, Kleiboer A, et al. Demographic and need factors of early, delayed and no mental  
4 health care use in major depression: a prospective study. *BMC psychiatry* 2017;17(1):367. doi:  
5 10.1186/s12888-017-1531-8 [published Online First: 2017/11/18]
- 6 21. Hansen AH, Høye A. Gender differences in the use of psychiatric outpatient specialist services in Tromsø,  
7 Norway are dependent on age: a population-based cross-sectional survey. *BMC Health Serv Res* 2015;15:  
8 doi:10.1186/s12913-015-1146-z.:doi-1146.
- 9 22. Dezetter A, Duhoux A, Menear M, et al. Reasons and Determinants for Perceiving Unmet Needs for Mental  
10 Health in Primary Care in Quebec. *Can J Psychiatry* 2015;60(6):284-93.
- 11 23. Evans-Lacko S, Aguilar-Gaxiola S, Al-Hamzawi A, et al. Socio-economic variations in the mental health  
12 treatment gap for people with anxiety, mood, and substance use disorders: results from the WHO World  
13 Mental Health (WMH) surveys. *Psychol Med* 2017;1-12. doi: 10.1017/s0033291717003336 [published  
14 Online First: 2017/11/28]
- 15 24. Packness A, Waldorff FB, Christensen RD, et al. Impact of socioeconomic position and distance on mental  
16 health care utilization: a nationwide Danish follow-up study. *Soc Psychiatry Psychiatr Epidemiol* 2017;10:  
17 1437. doi: doi: 10.1007/s00127-017-1437-2
- 18 25. Pedersen KM, Andersen JS, Sondergaard J. General practice and primary health care in Denmark. *J Am Board  
19 Fam Med* 2012;25 Suppl 1:S34-8. doi: 10.3122/jabfm.2012.02.110216.:S34-S38.
- 20 26. Larsen A. Psykologbehandling: [www.sundhed.dk](http://www.sundhed.dk); 2014 [updated 9/29/2014. Available from:  
21 [www.sundhed.dk/borger/sygdomme-a-aa/sociale-ydelser/sociale-  
23 ydelser/behandling/psykologbehandling/](http://www.sundhed.dk/borger/sygdomme-a-aa/sociale-ydelser/sociale-<br/>22 ydelser/behandling/psykologbehandling/).
- 24 27. Bergholdt HK, Bathum L, Kvetny J, et al. Study design, participation and characteristics of the Danish General  
25 Suburban Population Study. *Dan Med J* 2013;60(9):A4693. doi: A4693 [pii]
- 26 28. Økonomi- og Indenrigsministeriet. [Alligement between municipalities and general subsidizes 2014]  
27 Kommunal udligning og generelle tilskud 2014. In: Indenrigsministeriet Ø-o, ed. København, 2013:1-246.
- 28 29. Pedersen CB. The Danish Civil Registration System. *Scand J Public Health* 2011;39(7 Suppl):22-25.
- 29 30. Olsen LR, Jensen DV, Noerholm V, et al. The internal and external validity of the Major Depression Inventory in  
30 measuring severity of depressive states. *Psychol Med* 2003;33(2):351-56.
- 31 31. World Health Organization. The ICD-10 Classification of Mental and Behavioural Disorders 1989.
- 32 32. Bech P, Timmerby N, Martiny K, et al. Psychometric evaluation of the Major Depression Inventory (MDI) as  
33 depression severity scale using the LEAD (Longitudinal Expert Assessment of All Data) as index of validity.  
34 *BMC Psychiatry* 2015;15:190. doi: 10.1186/s12888-015-0529-3.:190-0529.
- 35 33. Sundhedsstyrelsen. [Referenceprogram for treatment of unipolar depression in adults]. In: (SfR) SfR, ed.  
36 Copenhagen, 2007:1-138.
- 37 34. Bech P. Clinical Psychometrics. First ed. Oxford: John Wiley & Sons, Ltd. 2012:153-53.
- 38 35. Galobardes B, Shaw M, Lawlor DA, et al. Indicators of socioeconomic position (part 1). *J Epidemiol Community  
39 Health* 2006;60(1):7-12. doi: 10.1136/jech.2004.023531 [doi]
- 40 36. Andersen JS, Olivarius NF, Krasnik A. The Danish National Health Service Register. *Scand J Public Health  
41 2011;39(7 Suppl):34-37.*
- 42 37. Kildemoes HW, Sorensen HT, Hallas J. The Danish National Prescription Registry. *Scand J Public Health  
43 2011;39(7 Suppl):38-41.*
- 44 38. World Health Organization CCfDSM. Guidelines for ATC classification and DDD assignment 2014. 17 ed. Oslo:  
45 Norwegian Institute of Public Health 2013:1-273.
- 46 39. Lynge E, Sandegaard JL, Rebolj M. The Danish National Patient Register. *Scand J Public Health* 2011;39(7  
47 Suppl):30-33.
- 48 40. Stata Statistical Software: Release 14. [program]. 1 version: College Station,TX:StataCorp LP., 2015.
- 49 41. Statistics Denmark. StatBank Denmark [Public Database]. Statistics Denmark; [Available from:  
50 [www.statistikbanken.dk](http://www.statistikbanken.dk) accessed 11/11 2015.
- 51 42. McCracken C, Dalgard OS, Ayuso-Mateos JL, et al. Health service use by adults with depression: Community  
52 survey in five European countries - Evidence from the ODIN study. *British Journal of Psychiatry*  
53 2006;189(AUG.):August. doi: <http://dx.doi.org/10.1192/bjp.bp.105.015081>
- 54  
55  
56  
57  
58  
59  
60

43. Sun Y, Moller J, Lundin A, et al. Utilization of psychiatric care and antidepressants among people with different severity of depression: a population-based cohort study in Stockholm, Sweden. *Soc Psychiatry Psychiatr Epidemiol* 2018;53(6):607-15. doi: 10.1007/s00127-018-1515-0
44. Gabilondo A, Rojas-Farreras S, Rodriguez A, et al. Use of primary and specialized mental health care for a major depressive episode in Spain by ESEMeD respondents. *Psychiatr Serv* 2011;62(2):152-61.
45. Dey M, Jorm AF. Social determinants of mental health service utilization in Switzerland. *Int J Public Health* 2017;62(1):85-93.
46. ten Have M, Nuyen J, Beekman A, et al. Common mental disorder severity and its association with treatment contact and treatment intensity for mental health problems. *Psychol Med* 2013;1-11.
47. Hansen AH, Halvorsen PA, Ringberg U, et al. Socio-economic inequalities in health care utilisation in Norway: a population based cross-sectional survey. *BMC Health Serv Res* 2012;12:336. doi: 10.1186/1472-6963-12-336.:336-12.
48. ten Have M, Oldehinkel A, Vollebergh W, et al. Does educational background explain inequalities in care service use for mental health problems in the Dutch general population? *Acta Psychiatr Scand* 2003;107:178-87.
49. Vasiliadis HM, Tempier R, Lesage A, et al. General practice and mental health care: determinants of outpatient service use. *Can J Psychiatry* 2009;54(7):468-76.
50. Wallerblad A, Moller J, Forsell Y. Care-Seeking Pattern among Persons with Depression and Anxiety: A Population-Based Study in Sweden. *Int J Family Med* 2012;2012:895425. doi: 10.1155/2012/895425. Epub;2012 May 10.:895425.
51. Perkins D, Fuller J, Kelly BJ, et al. Factors associated with reported service use for mental health problems by residents of rural and remote communities: cross-sectional findings from a baseline survey. *BMC Health Serv Res* 2013;13:157. doi: 10.1186/1472-6963-13-157.:157-13.
52. Mitchell AJ, Vaze A, Rao S. Clinical diagnosis of depression in primary care: a meta-analysis. *Lancet* 2009;374(9690):609-19.
53. Carey M, Jones K, Meadows G, et al. Accuracy of general practitioner unassisted detection of depression. *Aust N Z J Psychiatry* 2014;48(6):571-78.
54. Brandstetter S, Dodoo-Schittko F, Speerforck S, et al. Trends in non-help-seeking for mental disorders in Germany between 1997-1999 and 2009-2012: a repeated cross-sectional study. *Soc Psychiatry Psychiatr Epidemiol* 2017:10-1384.
55. Kiil A, Houlberg K. How does copayment for health care services affect demand, health and redistribution? A systematic review of the empirical evidence from 1990 to 2011. *Eur J Health Econ* 2014;15(8):813-28.
56. Bobevski I, Rosen A, Meadows G. Mental health service use and need for care of Australians without diagnoses of mental disorders: findings from a large epidemiological survey. *Epidemiol Psychiatr Sci* 2017;%19:1-11. doi: 10.1017/S2045796017000300.:1-11.
57. Butterworth P, Olesen SC, Leach LS. Socioeconomic differences in antidepressant use in the PATH Through Life Study: evidence of health inequalities, prescribing bias, or an effective social safety net? *J Affect Disord* 2013;149(1-3):75-83.
58. Riskowski JL. Associations of socioeconomic position and pain prevalence in the United States: findings from the National Health and Nutrition Examination Survey. *Pain medicine (Malden, Mass)* 2014;15(9):1508-21. doi: 10.1111/pme.12528 [published Online First: 2014/08/21]
59. Brusco NK, Watts JJ. Empirical evidence of recall bias for primary health care visits. *BMC Health Serv Res* 2015;15:381. doi: 10.1186/s12913-015-1039-1.:381-1039.

Socioeconomic position, symptoms of depression and subsequent mental health care treatment: a Danish register-based six-month follow-up study on a population survey.

**Supplementary figure and tables**

Figure 1

Sampling from the Danish General Suburban Population Study

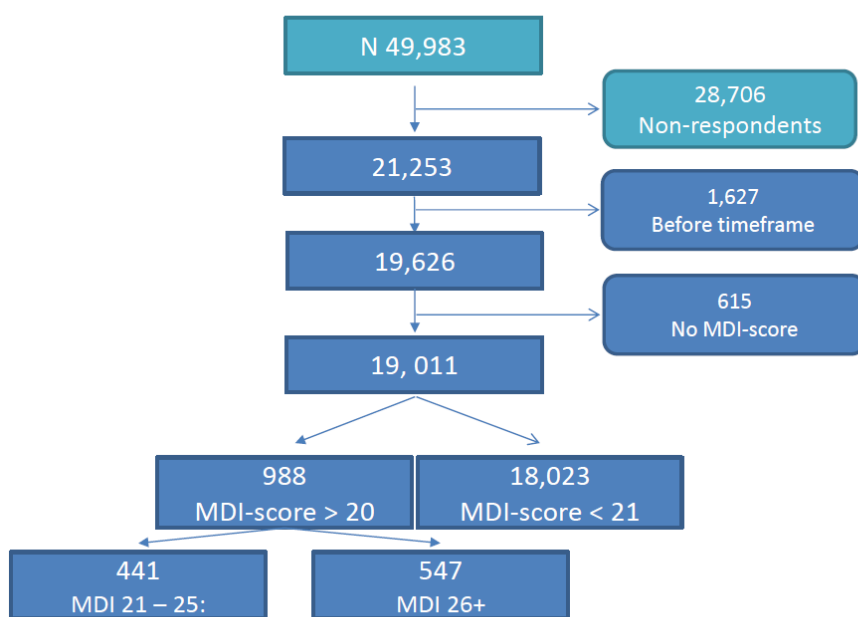

AD: Antidepressants; MDI: Major Depression Inventory

Supplement Table 1. Definition of treatment levels

| Level | Primary health care | Additional health care             | Defined by source and code                              |
|-------|---------------------|------------------------------------|---------------------------------------------------------|
| 0     | No contact          |                                    | Not in NPR, NHR, NPrR                                   |
| 1     | GP                  | Consultation                       | + NHR GP (800101 + 800120 + (800411 – 800491) + 804001) |
| 2     | GP                  | Mental health counselling by GP    | + NHR GP & contact concerning mental health (806101)    |
| 3     | GP                  | Antidepressants                    | + NPrR by ATC: N06A – excluding N06AX12                 |
| 4     | GP                  | Private psychologist               | +NHR (630110 – 630211) + (630214 – 630340)              |
| 5     | GP                  | Private psychiatrist               | +NHR (240110 – 240140) + (240210 – 240236) + 241401     |
| 6     | GP                  | Out-patient psychiatry             | +NPR by ICD-10: F 00– F99.99                            |
| 7     | GP                  | Mental hospital & Emergency visits | +NPR by ICD-10: F 00– F99.99                            |

NPR: The National Patient Register; NHR: The National Health Service Register; NPrR: The National Prescription Registry; ATC: Anatomical Therapeutic Chemical classification.

Socioeconomic position, symptoms of depression and subsequent mental health care treatment:  
a Danish register-based six-month follow-up study on a population survey.

**Supplement Table 2. Number and mean number of Mental health care treatments by MDI grade**

| <b>Symptoms of depression</b>   | <b>No/few</b> | <b>Mild</b> | <b>Moderate/severe</b> | <b>Total</b> |
|---------------------------------|---------------|-------------|------------------------|--------------|
| Persons n (Pct.)                | 18023 (100)   | 441 (100)   | 547 (100)              | 19011 (100)  |
| <b>No contact</b>               |               |             |                        |              |
| Persons n (Pct.)                | 4540 (25.2)   | 73 (16.6)   | 56 (10.2)              | 4669 (24.6)  |
| <b>GP consultation</b>          |               |             |                        |              |
| Persons n (Pct.)                | 13329 (74.0)  | 356 (80.7)  | 474 (86.7)             | 14159 (74.5) |
| Visits n                        | 45044         | 1433        | 2252                   | 48729        |
| Visit rates $\bar{x}$           | 3.38          | 4.03        | 4.75                   | 3.44         |
| <b>GP MHC</b>                   |               |             |                        |              |
| Persons n (Pct.)                | 329 (1.8)     | 28 (6.3)    | 64 (11.7)              | 421 (2.2)    |
| Visits n                        | 611           | 57          | 168                    | 836          |
| Visit rates $\bar{x}$           | 1.86          | 2.04        | 2.63                   | 1.99         |
| <b>Antidepressants#</b>         |               |             |                        |              |
| Persons n (Pct.)                | 1056 (5.9)    | 87 (29.7)   | 186 (34.0)             | 1329 (7.0)   |
| Prescriptions n                 | 2769          | 227         | 670                    | 3666         |
| Prescrip rates $\bar{x}$        | 2.62          | 2.61        | 3.60                   | 2.76         |
| <b>Psychologists</b>            |               |             |                        |              |
| Persons n (Pct.)                | 167 (0.9)     | 19 (4.3)    | 31 (5.7)               | 217 (1.1)    |
| Visits n                        | 706           | 112         | 144                    | 962          |
| Visit rates $\bar{x}$           | 4.23          | 5.89        | 4.65                   | 4.43         |
| <b>Private psychiatrist</b>     |               |             |                        |              |
| Persons n (Pct.)                | 100 (0.6)     | 20 (4.5)    | 42 (7.7)               | 162 (0.9)    |
| Visits n                        | 274           | 57          | 201                    | 532          |
| Visit rates $\bar{x}$           | 2.74          | 2.85        | 4.79                   | 3.28         |
| <b>Out-patient Psychiatry</b>   |               |             |                        |              |
| Persons n (Pct.)                | 22 (0.1)      | 4 (0.9)     | 9 (1.6)                | 35 (0.2)     |
| Visits n                        | 103           | 34          | 46                     | 183          |
| Visit rates $\bar{x}$           | 4.68          | 8.50        | 5.11                   | 5.23         |
| <b>Specialized services*</b>    |               |             |                        |              |
| Persons n (Pct.)                | 283 (1.6)     | 40 (9.1)    | 76 (13.9)              | 399 (2.1)    |
| Visits n                        | 1083          | 203         | 391                    | 1677         |
| Visit rates $\bar{x}$           | 3.83          | 5.07        | 5.14                   | 4.20         |
| <b>Admission MH &amp; EA **</b> |               |             |                        |              |
| Persons n (Pct.)                | 33 (0.2)      | 4 (0.9)     | 14 (2.6)               | 51 (0.3)     |
| Visits n                        | 49            | 11          | 37                     | 97           |
| Visit rates $\bar{x}$           | 1.48          | 2.75        | 2.64                   | 1.90         |

$\bar{x}$  Mean number of visits by respondents using the service/prescriptions

# Reimbursed prescriptions

\* Contact to either psychologist or psychiatrist, public or private

\*\* MH: Mental hospital; EA: Emergency access psychiatric ward

Supplement Table 3. Highest treatment level gained within six months by education, income, and severity of symptoms, in crude numbers and percentage

| Crude                                    | Highest gained treatment level* |          |          |          |          |          |          |          |      | Crude                              | Highest gained treatment level* |          |          |          |          |          |          |          |      |     |              |
|------------------------------------------|---------------------------------|----------|----------|----------|----------|----------|----------|----------|------|------------------------------------|---------------------------------|----------|----------|----------|----------|----------|----------|----------|------|-----|--------------|
| <b>No postsec education</b>              | 0                               | 1        | 2        | 3        | 4        | 5        | 6        | 7        |      | <b>Income &lt; 40,250€</b>         | 0                               | 1        | 2        | 3        | 4        | 5        | 6        | 7        |      |     |              |
| MDI < 21                                 | 512                             | 1783     | 17       | 162      | 5        | 11       | 6        | 6        | 2502 | MDI < 21                           | 649                             | 2809     | 28       | 292      | 26       | 27       | 7        | 12       | 3850 |     |              |
| MDI 21 - 25                              | 9                               | 62       | 2        | 13       | 3        | 3        | 0        | 1        | 93   | MDI 21 - 25                        | 19                              | 80       | 2        | 20       | 9        | 6        | 1        | 1        | 138  |     |              |
| MDI >25                                  | 9                               | 63       | 5        | 39       | 3        | 11       | 2        | 4        | 136  | MDI >25                            | 17                              | 99       | 4        | 58       | 7        | 16       | 1        | 6        | 208  |     |              |
| Missing                                  | 15                              | 208      | 2        | 27       | 2        | 0        | 1        | 2        | 257  | Missing                            | 33                              | 204      | 3        | 26       | 2        | 3        | 1        | 1        | 273  |     |              |
| <b>1-3 years postsecondary education</b> |                                 |          |          |          |          |          |          |          |      | <b>Income ≥ 40,250 &lt;80,500€</b> |                                 |          |          |          |          |          |          |          |      |     |              |
| MDI < 21                                 | 2361                            | 6512     | 84       | 515      | 93       | 54       | 10       | 21       | 9650 | MDI < 21                           | 1586                            | 4113     | 74       | 318      | 62       | 34       | 6        | 14       | 6207 |     |              |
| MDI 21 - 25                              | 39                              | 134      | 1        | 31       | 6        | 9        | 3        | 2        | 225  | MDI 21 - 25                        | 22                              | 83       | 1        | 19       | 4        | 7        | 0        | 1        | 137  |     |              |
| MDI >25                                  | 28                              | 122      | 8        | 59       | 14       | 20       | 2        | 4        | 257  | MDI >25                            | 22                              | 73       | 7        | 32       | 8        | 13       | 5        | 4        | 164  |     |              |
| Missing                                  | 42                              | 177      | 5        | 22       | 2        | 3        | 0        | 0        | 251  | Missing                            | 20                              | 81       | 2        | 13       | 1        | 1        | 0        | 0        | 118  |     |              |
| <b>3+ years postsecondary education</b>  |                                 |          |          |          |          |          |          |          |      | <b>Income ≥80,500€</b>             |                                 |          |          |          |          |          |          |          |      |     |              |
| MDI < 21                                 | 1667                            | 3789     | 59       | 254      | 64       | 31       | 1        | 6        | 5871 | MDI < 21                           | 1969                            | 3923     | 44       | 209      | 63       | 26       | 0        | 4        | 6238 |     |              |
| MDI 21 - 25                              | 25                              | 61       | 2        | 20       | 8        | 6        | 0        | 1        | 123  | MDI 21 - 25                        | 27                              | 62       | 2        | 12       | 4        | 5        | 2        | 2        | 116  |     |              |
| MDI >25                                  | 19                              | 74       | 7        | 27       | 10       | 8        | 3        | 6        | 154  | MDI >25                            | 10                              | 61       | 5        | 15       | 7        | 7        | 0        | 2        | 107  |     |              |
| Missing                                  | 25                              | 68       | 0        | 12       | 1        | 1        | 0        | 0        | 107  | Missing                            | 13                              | 24       | 0        | 1        | 1        | 0        | 0        | 0        | 39   |     |              |
| <b>Pct</b>                               |                                 |          |          |          |          |          |          |          |      | <b>Spec#</b>                       | <b>Pct</b>                      |          |          |          |          |          |          |          |      |     | <b>Spec#</b> |
| <b>No postsec education</b>              | <b>0</b>                        | <b>1</b> | <b>2</b> | <b>3</b> | <b>4</b> | <b>5</b> | <b>6</b> | <b>7</b> |      | <b>Income &lt; 40,250€</b>         | <b>0</b>                        | <b>1</b> | <b>2</b> | <b>3</b> | <b>4</b> | <b>5</b> | <b>6</b> | <b>7</b> |      |     |              |
| MDI < 21                                 | 20                              | 71       | 0,7      | 6,5      | 0,2      | 0,4      | 0,2      | 0,2      |      | 0,9                                | MDI < 21                        | 17       | 73       | 1        | 8        | 1        | 1        | 0        | 0    | 100 | 1,6          |
| MDI 21 - 25                              | 10                              | 67       | 2,2      | 14,0     | 3,2      | 3,2      | 0,0      | 1,1      | 100  | 6,5                                | MDI 21 - 25                     | 14       | 58       | 1        | 14       | 7        | 4        | 1        | 1    | 100 | 11,6         |
| MDI >25                                  | 7                               | 46       | 3,7      | 28,7     | 2,2      | 8,1      | 1,5      | 2,9      | 100  | 11,8                               | MDI >25                         | 8        | 48       | 2        | 28       | 3        | 8        | 0        | 3    | 100 | 11,5         |
| <b>1-3 years postsecondary education</b> |                                 |          |          |          |          |          |          |          |      | <b>Income ≥ 40,250 &lt;80,500€</b> |                                 |          |          |          |          |          |          |          |      |     |              |
| MDI < 21                                 | 24                              | 67       | 0,9      | 5,3      | 1,0      | 0,6      | 0,1      | 0,2      | 100  | 1,6                                | MDI < 21                        | 26       | 66       | 1        | 5        | 1        | 1        | 0        | 0    | 100 | 1,6          |
| MDI 21 - 25                              | 17                              | 60       | 0,4      | 13,8     | 2,7      | 4,0      | 1,3      | 0,9      | 100  | 8,0                                | MDI 21 - 25                     | 16       | 61       | 1        | 14       | 3        | 5        | 0        | 1    | 100 | 8,0          |
| MDI >25                                  | 11                              | 47       | 3,1      | 23,0     | 5,4      | 7,8      | 0,8      | 1,6      | 100  | 14,0                               | MDI >25                         | 13       | 45       | 4        | 20       | 5        | 8        | 3        | 2    | 100 | 15,9         |
| <b>3+ years postsecondary education</b>  |                                 |          |          |          |          |          |          |          |      | <b>Income ≥80,500€</b>             |                                 |          |          |          |          |          |          |          |      |     |              |
| MDI < 21                                 | 28                              | 65       | 1,0      | 4,3      | 1,1      | 0,5      | 0,0      | 0,1      | 100  | 1,6                                | MDI < 21                        | 32       | 63       | 1        | 3        | 1        | 0        | 0        | 0    | 100 | 1,4          |
| MDI 21 - 25                              | 20                              | 50       | 1,6      | 16,3     | 6,5      | 4,9      | 0,0      | 0,8      | 100  | 11,4                               | MDI 21 - 25                     | 23       | 53       | 2        | 10       | 3        | 4        | 2        | 2    | 100 | 9,5          |
| MDI >25                                  | 12                              | 48       | 4,5      | 17,5     | 6,5      | 5,2      | 1,9      | 3,9      | 100  | 13,6                               | MDI >25                         | 9        | 57       | 5        | 14       | 7        | 7        | 0        | 2    | 100 | 13,1         |

Treatment level: 0: none; 1: GP (general practitioner); 2: GP-mental health consultations; 3: antidepressants; 4: psychologist; 5: private psychiatrist; 6: public psychiatrist; 7: mental hospital

#Spec: Specialized services includes 4+5+6



STROBE Statement for the study: **Socioeconomic position, symptoms of depression, and subsequent health care utilization and treatment: a Danish register-based six-month follow-up on a survey study.**

|                              | Item No | Recommendation                                                                                                                                                                                    | Addressed on page:     |
|------------------------------|---------|---------------------------------------------------------------------------------------------------------------------------------------------------------------------------------------------------|------------------------|
| <b>Title and abstract</b>    | 1       | (a) Indicate the study's design with a commonly used term in the title or the abstract                                                                                                            | 1                      |
|                              |         | (b) Provide in the abstract an informative and balanced summary of what was done and what was found                                                                                               | 2                      |
| <b>Introduction</b>          |         |                                                                                                                                                                                                   |                        |
| Background/rationale         | 2       | Explain the scientific background and rationale for the investigation being reported                                                                                                              | 3                      |
| Objectives                   | 3       | State specific objectives, including any prespecified hypotheses                                                                                                                                  | 3                      |
| <b>Methods</b>               |         |                                                                                                                                                                                                   |                        |
| Study design                 | 4       | Present key elements of study design early in the paper                                                                                                                                           | 3                      |
| Setting                      | 5       | Describe the setting, locations, and relevant dates, including periods of recruitment, exposure, follow-up, and data collection                                                                   | 4                      |
| Participants                 | 6       | (a) Give the eligibility criteria, and the sources and methods of selection of participants. Describe methods of follow-up                                                                        | 4 - 5                  |
|                              |         | (b) For matched studies, give matching criteria and number of exposed and unexposed                                                                                                               |                        |
| Variables                    | 7       | Clearly define all outcomes, exposures, predictors, potential confounders, and effect modifiers. Give diagnostic criteria, if applicable                                                          | 4 - 5<br>Table 1       |
| Data sources/<br>measurement | 8*      | For each variable of interest, give sources of data and details of methods of assessment (measurement). Describe comparability of assessment methods if there is more than one group              | 4 - 5<br>Table 1       |
| Bias                         | 9       | Describe any efforts to address potential sources of bias                                                                                                                                         |                        |
| Study size                   | 10      | Explain how the study size was arrived at                                                                                                                                                         | 4 + 8 &<br>Suppl Fig 1 |
| Quantitative variables       | 11      | Explain how quantitative variables were handled in the analyses. If applicable, describe which groupings were chosen and why                                                                      | 4 - 6                  |
| Statistical methods          | 12      | (a) Describe all statistical methods, including those used to control for confounding                                                                                                             | 6 - 7                  |
|                              |         | (b) Describe any methods used to examine subgroups and interactions                                                                                                                               |                        |
|                              |         | (c) Explain how missing data were addressed                                                                                                                                                       | 7                      |
|                              |         | (d) If applicable, explain how loss to follow-up was addressed                                                                                                                                    | 4                      |
|                              |         | (e) Describe any sensitivity analyses                                                                                                                                                             |                        |
| <b>Results</b>               |         |                                                                                                                                                                                                   |                        |
| Participants                 | 13*     | (a) Report numbers of individuals at each stage of study—eg numbers potentially eligible, examined for eligibility, confirmed eligible, included in the study, completing follow-up, and analysed | 8<br>Suppl fig 1       |
|                              |         | (b) Give reasons for non-participation at each stage                                                                                                                                              | Figure 1               |
|                              |         | (c) Consider use of a flow diagram                                                                                                                                                                | Figure 1               |
| Descriptive data             | 14*     | (a) Give characteristics of study participants (eg demographic, clinical, social) and information on exposures and potential confounders                                                          | Table 1                |
|                              |         | (b) Indicate number of participants with missing data for each variable of interest                                                                                                               | Table 1                |
|                              |         | (c) Summarise follow-up time (eg, average and total amount)                                                                                                                                       |                        |



|    |                          |     |                                                                                  |                            |
|----|--------------------------|-----|----------------------------------------------------------------------------------|----------------------------|
| 1  | Outcome data             | 15* | Report numbers of outcome events or summary measures over time                   |                            |
| 2  | Main results             | 16  | (a) Give unadjusted estimates and, if applicable, confounder-adjusted            | Table 4<br>Supp tab<br>2+3 |
| 3  |                          |     | estimates and their precision (eg, 95% confidence interval). Make clear          |                            |
| 4  |                          |     | which confounders were adjusted for and why they were included                   |                            |
| 5  |                          |     | (b) Report category boundaries when continuous variables were categorized        | 4                          |
| 6  |                          |     | (c) If relevant, consider translating estimates of relative risk into absolute   |                            |
| 7  |                          |     | risk for a meaningful time period                                                |                            |
| 8  | Other analyses           | 17  | Report other analyses done—eg analyses of subgroups and interactions, and        | 7                          |
| 9  |                          |     | sensitivity analyses                                                             |                            |
| 10 | <b>Discussion</b>        |     |                                                                                  |                            |
| 11 | Key results              | 18  | Summarise key results with reference to study objectives                         | 13                         |
| 12 | Limitations              | 19  | Discuss limitations of the study, taking into account sources of potential       | 15                         |
| 13 |                          |     | bias or imprecision. Discuss both direction and magnitude of any potential       |                            |
| 14 |                          |     | bias                                                                             |                            |
| 15 | Interpretation           | 20  | Give a cautious overall interpretation of results considering objectives,        | 13 - 16                    |
| 16 |                          |     | limitations, multiplicity of analyses, results from similar studies, and other   |                            |
| 17 |                          |     | relevant evidence                                                                |                            |
| 18 | Generalisability         | 21  | Discuss the generalisability (external validity) of the study results            | 15-16                      |
| 19 | <b>Other information</b> |     |                                                                                  |                            |
| 20 | Funding                  | 22  | Give the source of funding and the role of the funders for the present study     | 1                          |
| 21 |                          |     | and, if applicable, for the original study on which the present article is based |                            |

\*Give information separately for exposed and unexposed groups.

**Note:** An Explanation and Elaboration article discusses each checklist item and gives methodological background and published examples of transparent reporting. The STROBE checklist is best used in conjunction with this article (freely available on the Web sites of PLoS Medicine at <http://www.plosmedicine.org/>, Annals of Internal Medicine at <http://www.annals.org/>, and Epidemiology at <http://www.epidem.com/>). Information on the STROBE Initiative is available at <http://www.strobe-statement.org>.
