# Supplementary material for: Socioeconomic position, symptoms of depression and subsequent mental healthcare treatment: a Danish register-based 6-month follow-up study on a population survey
Source: PubMed Central journal article supplement — BMJ Open. 2018 Oct 3;8(10):e020945. doi: 10.1136/bmjopen-2017-020945 (PMC6194401; doi:10.1136/bmjopen-2017-020945), 2018-10-03
Supplement: bmjopen-2017-020945supp001.pdf [file bmjopen-2017-020945supp001.pdf]

Socioeconomic position, symptoms of depression and subsequent mental health care treatment: a Danish register-based six-month follow-up study on a population survey.

**Supplementary figure and tables**

Figure 1

Sampling from the Danish General Suburban Population Study

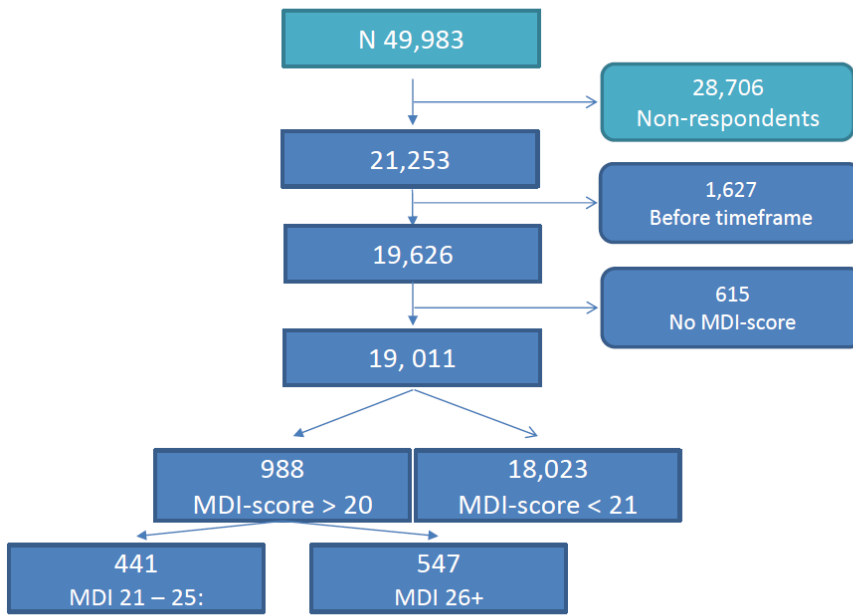

AD: Antidepressants; MDI: Major Depression Inventory

Supplement Table 1. Definition of treatment levels

| Level | Primary health care | Additional health care             | Defined by source and code                              |
|-------|---------------------|------------------------------------|---------------------------------------------------------|
| 0     | No contact          |                                    | Not in NPR, NHR, NPrR                                   |
| 1     | GP                  | Consultation                       | + NHR GP (800101 + 800120 + (800411 – 800491) + 804001) |
| 2     | GP                  | Mental health counselling by GP    | + NHR GP & contact concerning mental health (806101)    |
| 3     | GP                  | Antidepressants                    | + NPrR by ATC: N06A – excluding N06AX12                 |
| 4     | GP                  | Private psychologist               | +NHR (630110 – 630211) + (630214 – 630340)              |
| 5     | GP                  | Private psychiatrist               | +NHR (240110 – 240140) + (240210 – 240236) + 241401     |
| 6     | GP                  | Out-patient psychiatry             | +NPR by ICD-10: F 00– F99.99                            |
| 7     | GP                  | Mental hospital & Emergency visits | +NPR by ICD-10: F 00– F99.99                            |

NPR: The National Patient Register; NHR: The National Health Service Register; NPrR: The National Prescription Registry; ATC: Anatomical Therapeutic Chemical classification.

Socioeconomic position, symptoms of depression and subsequent mental health care treatment:  
a Danish register-based six-month follow-up study on a population survey.

**Supplement Table 2. Number and mean number of *Mental health care treatments* by MDI grade**

| <b>Symptoms of depression</b>   | <b>No/few</b> | <b>Mild</b> | <b>Moderate/severe</b> | <b>Total</b> |
|---------------------------------|---------------|-------------|------------------------|--------------|
| Persons n (Pct.)                | 18023 (100)   | 441 (100)   | 547 (100)              | 19011 (100)  |
| <b>No contact</b>               |               |             |                        |              |
| Persons n (Pct.)                | 4540 (25.2)   | 73 (16.6)   | 56 (10.2)              | 4669 (24.6)  |
| <b>GP consultation</b>          |               |             |                        |              |
| Persons n (Pct.)                | 13329 (74.0)  | 356 (80.7)  | 474 (86.7)             | 14159 (74.5) |
| Visits n                        | 45044         | 1433        | 2252                   | 48729        |
| Visit rates $\bar{x}$           | 3.38          | 4.03        | 4.75                   | 3.44         |
| <b>GP MHC</b>                   |               |             |                        |              |
| Persons n (Pct.)                | 329 (1.8)     | 28 (6.3)    | 64 (11.7)              | 421 (2.2)    |
| Visits n                        | 611           | 57          | 168                    | 836          |
| Visit rates $\bar{x}$           | 1.86          | 2.04        | 2.63                   | 1.99         |
| <b>Antidepressants#</b>         |               |             |                        |              |
| Persons n (Pct.)                | 1056 (5.9)    | 87 (29.7)   | 186 (34.0)             | 1329 (7.0)   |
| Prescriptions n                 | 2769          | 227         | 670                    | 3666         |
| Prescrip rates $\bar{x}$        | 2.62          | 2.61        | 3.60                   | 2.76         |
| <b>Psychologists</b>            |               |             |                        |              |
| Persons n (Pct.)                | 167 (0.9)     | 19 (4.3)    | 31 (5.7)               | 217 (1.1)    |
| Visits n                        | 706           | 112         | 144                    | 962          |
| Visit rates $\bar{x}$           | 4.23          | 5.89        | 4.65                   | 4.43         |
| <b>Private psychiatrist</b>     |               |             |                        |              |
| Persons n (Pct.)                | 100 (0.6)     | 20 (4.5)    | 42 (7.7)               | 162 (0.9)    |
| Visits n                        | 274           | 57          | 201                    | 532          |
| Visit rates $\bar{x}$           | 2.74          | 2.85        | 4.79                   | 3.28         |
| <b>Out-patient Psychiatry</b>   |               |             |                        |              |
| Persons n (Pct.)                | 22 (0.1)      | 4 (0.9)     | 9 (1.6)                | 35 (0.2)     |
| Visits n                        | 103           | 34          | 46                     | 183          |
| Visit rates $\bar{x}$           | 4.68          | 8.50        | 5.11                   | 5.23         |
| <b>Specialized services*</b>    |               |             |                        |              |
| Persons n (Pct.)                | 283 (1.6)     | 40 (9.1)    | 76 (13.9)              | 399 (2.1)    |
| Visits n                        | 1083          | 203         | 391                    | 1677         |
| Visit rates $\bar{x}$           | 3.83          | 5.07        | 5.14                   | 4.20         |
| <b>Admission MH &amp; EA **</b> |               |             |                        |              |
| Persons n (Pct.)                | 33 (0.2)      | 4 (0.9)     | 14 (2.6)               | 51 (0.3)     |
| Visits n                        | 49            | 11          | 37                     | 97           |
| Visit rates $\bar{x}$           | 1.48          | 2.75        | 2.64                   | 1.90         |

$\bar{x}$  Mean number of visits by respondents using the service/prescriptions

# Reimbursed prescriptions

\* Contact to either psychologist or psychiatrist, public or private

\*\* MH: Mental hospital; EA: Emergency access psychiatric ward

Supplement Table 3. Highest treatment level gained within six months by education, income, and severity of symptoms, in crude numbers and percentage

| Crude                                    |      |      |     |      |     |     |     |     |       | Crude                              |             |      |    |     |    |    |   |    |       |     |      |
|------------------------------------------|------|------|-----|------|-----|-----|-----|-----|-------|------------------------------------|-------------|------|----|-----|----|----|---|----|-------|-----|------|
| Highest gained treatment level*          |      |      |     |      |     |     |     |     |       | Highest gained treatment level*    |             |      |    |     |    |    |   |    |       |     |      |
| No postsec education                     | 0    | 1    | 2   | 3    | 4   | 5   | 6   | 7   |       | Income < 40,250€                   | 0           | 1    | 2  | 3   | 4  | 5  | 6 | 7  |       |     |      |
| MDI < 21                                 | 512  | 1783 | 17  | 162  | 5   | 11  | 6   | 6   | 2502  | MDI < 21                           | 649         | 2809 | 28 | 292 | 26 | 27 | 7 | 12 | 3850  |     |      |
| MDI 21 - 25                              | 9    | 62   | 2   | 13   | 3   | 3   | 0   | 1   | 93    | MDI 21 - 25                        | 19          | 80   | 2  | 20  | 9  | 6  | 1 | 1  | 138   |     |      |
| MDI >25                                  | 9    | 63   | 5   | 39   | 3   | 11  | 2   | 4   | 136   | MDI >25                            | 17          | 99   | 4  | 58  | 7  | 16 | 1 | 6  | 208   |     |      |
| Missing                                  | 15   | 208  | 2   | 27   | 2   | 0   | 1   | 2   | 257   | Missing                            | 33          | 204  | 3  | 26  | 2  | 3  | 1 | 1  | 273   |     |      |
| <b>1-3 years postsecondary education</b> |      |      |     |      |     |     |     |     |       | <b>Income ≥ 40,250 &lt;80,500€</b> |             |      |    |     |    |    |   |    |       |     |      |
| MDI < 21                                 | 2361 | 6512 | 84  | 515  | 93  | 54  | 10  | 21  | 9650  | MDI < 21                           | 1586        | 4113 | 74 | 318 | 62 | 34 | 6 | 14 | 6207  |     |      |
| MDI 21 - 25                              | 39   | 134  | 1   | 31   | 6   | 9   | 3   | 2   | 225   | MDI 21 - 25                        | 22          | 83   | 1  | 19  | 4  | 7  | 0 | 1  | 137   |     |      |
| MDI >25                                  | 28   | 122  | 8   | 59   | 14  | 20  | 2   | 4   | 257   | MDI >25                            | 22          | 73   | 7  | 32  | 8  | 13 | 5 | 4  | 164   |     |      |
| Missing                                  | 42   | 177  | 5   | 22   | 2   | 3   | 0   | 0   | 251   | Missing                            | 20          | 81   | 2  | 13  | 1  | 1  | 0 | 0  | 118   |     |      |
| <b>3+ years postsecondary education</b>  |      |      |     |      |     |     |     |     |       | <b>Income ≥80,500€</b>             |             |      |    |     |    |    |   |    |       |     |      |
| MDI < 21                                 | 1667 | 3789 | 59  | 254  | 64  | 31  | 1   | 6   | 5871  | MDI < 21                           | 1969        | 3923 | 44 | 209 | 63 | 26 | 0 | 4  | 6238  |     |      |
| MDI 21 - 25                              | 25   | 61   | 2   | 20   | 8   | 6   | 0   | 1   | 123   | MDI 21 - 25                        | 27          | 62   | 2  | 12  | 4  | 5  | 2 | 2  | 116   |     |      |
| MDI >25                                  | 19   | 74   | 7   | 27   | 10  | 8   | 3   | 6   | 154   | MDI >25                            | 10          | 61   | 5  | 15  | 7  | 7  | 0 | 2  | 107   |     |      |
| Missing                                  | 25   | 68   | 0   | 12   | 1   | 1   | 0   | 0   | 107   | Missing                            | 13          | 24   | 0  | 1   | 1  | 0  | 0 | 0  | 39    |     |      |
| Pct                                      |      |      |     |      |     |     |     |     |       | Pct                                |             |      |    |     |    |    |   |    |       |     |      |
| No postsec education                     | 0    | 1    | 2   | 3    | 4   | 5   | 6   | 7   | Spec# | Income < 40,250€                   | 0           | 1    | 2  | 3   | 4  | 5  | 6 | 7  | Spec# |     |      |
| MDI < 21                                 | 20   | 71   | 0,7 | 6,5  | 0,2 | 0,4 | 0,2 | 0,2 | 0,9   | MDI < 21                           | 17          | 73   | 1  | 8   | 1  | 1  | 0 | 0  | 100   | 1,6 |      |
| MDI 21 - 25                              | 10   | 67   | 2,2 | 14,0 | 3,2 | 3,2 | 0,0 | 1,1 | 100   | 6,5                                | MDI 21 - 25 | 14   | 58 | 1   | 14 | 7  | 4 | 1  | 1     | 100 | 11,6 |
| MDI >25                                  | 7    | 46   | 3,7 | 28,7 | 2,2 | 8,1 | 1,5 | 2,9 | 100   | 11,8                               | MDI >25     | 8    | 48 | 2   | 28 | 3  | 8 | 0  | 3     | 100 | 11,5 |
| <b>1-3 years postsecondary education</b> |      |      |     |      |     |     |     |     |       | <b>Income ≥ 40,250 &lt;80,500€</b> |             |      |    |     |    |    |   |    |       |     |      |
| MDI < 21                                 | 24   | 67   | 0,9 | 5,3  | 1,0 | 0,6 | 0,1 | 0,2 | 100   | 1,6                                | MDI < 21    | 26   | 66 | 1   | 5  | 1  | 1 | 0  | 0     | 100 | 1,6  |
| MDI 21 - 25                              | 17   | 60   | 0,4 | 13,8 | 2,7 | 4,0 | 1,3 | 0,9 | 100   | 8,0                                | MDI 21 - 25 | 16   | 61 | 1   | 14 | 3  | 5 | 0  | 1     | 100 | 8,0  |
| MDI >25                                  | 11   | 47   | 3,1 | 23,0 | 5,4 | 7,8 | 0,8 | 1,6 | 100   | 14,0                               | MDI >25     | 13   | 45 | 4   | 20 | 5  | 8 | 3  | 2     | 100 | 15,9 |
| <b>3+ years postsecondary education</b>  |      |      |     |      |     |     |     |     |       | <b>Income ≥80,500€</b>             |             |      |    |     |    |    |   |    |       |     |      |
| MDI < 21                                 | 28   | 65   | 1,0 | 4,3  | 1,1 | 0,5 | 0,0 | 0,1 | 100   | 1,6                                | MDI < 21    | 32   | 63 | 1   | 3  | 1  | 0 | 0  | 0     | 100 | 1,4  |
| MDI 21 - 25                              | 20   | 50   | 1,6 | 16,3 | 6,5 | 4,9 | 0,0 | 0,8 | 100   | 11,4                               | MDI 21 - 25 | 23   | 53 | 2   | 10 | 3  | 4 | 2  | 2     | 100 | 9,5  |
| MDI >25                                  | 12   | 48   | 4,5 | 17,5 | 6,5 | 5,2 | 1,9 | 3,9 | 100   | 13,6                               | MDI >25     | 9    | 57 | 5   | 14 | 7  | 7 | 0  | 2     | 100 | 13,1 |

Treatment level: 0: none; 1: GP (general practitioner); 2: GP-mental health consultations; 3: antidepressants; 4: psychologist; 5: private psychiatrist; 6: public psychiatrist; 7: mental hospital

#Spec: Specialized services includes 4+5+6
